1 Correspondence: Dr. Alan M. Jones  
2 Address: Department of Biology  
3 The University of North Carolina at Chapel Hill  
4 Coker Hall, CB#3280

5  
6 Phone : (919) 962-6932  
7 Fax: (919) 962-1625  
8 E-mail: alan\_jones@unc.edu

9  
10 The author responsible for distribution of materials integral to the findings presented in this article  
11 is Dr. Alan Jones [alan\\_jones@unc.edu](mailto:alan_jones@unc.edu)

12 **Running Title:** Biased System Signaling

13 **Keywords:**

14  
15  
16  
17  
18  
19  
20  
21  
22  
23  
24  
25  
26

27 **Title: Biased Signaling: Distinct Ligand-directed Plasma Membrane**  
28 **Signalosomes Using a Common RGS/ G protein Core**

29 **AUTHORS** Timothy J. Ross-Elliott<sup>1</sup>, Justin Watkins<sup>1</sup>, Xiaoyi Shan<sup>2</sup>, Fei Lou<sup>1</sup>, Bernd  
30 Dreyer<sup>1</sup>, Meral Tunc-Ozdemir<sup>1</sup>, Haiyan Jia<sup>1</sup>, Jing Yang<sup>1</sup>, Luguang Wu<sup>2</sup>, Yuri Trusov<sup>3</sup>,  
31 Patrick Krysan<sup>4</sup>, and Alan M. Jones<sup>1,3,5</sup>

32 Department of <sup>1</sup> Biology and <sup>3</sup> Pharmacology, University of North Carolina at Chapel Hill, Chapel  
33 Hill, NC 27599, USA.

34 <sup>2</sup>Beijing Forestry University, Beijing China 1000083

35 <sup>3</sup>School of Agriculture and Food Science, The University of Queensland, St. Lucia, Q4072,  
36 Australia.

37 <sup>4</sup>Department of Horticulture, University of Wisconsin Madison, Madison, WI 53706, USA

38 <sup>5</sup>Lead Contact

39 \*Correspondence: alan\_jones@unc.edu

40

41 **Keywords:** Arrestin analog, AtRGS1, calcium signaling, clathrin-mediated endocytosis, MAPK  
42 activation, proximity labeling, sterol-dependent endocytosis, VPS26, WNK kinase,

43

44 **Abbreviations:** *Arabidopsis thaliana* Regulator of G Signaling (AtRGS1), Clathrin-Mediated  
45 Endocytosis (CME), Sterol-Dependent Endocytosis (SDE), Total Internal Reflection  
46 Fluorescence Microscopy (TIRF), Clathrin Light Chain (CLC), Flotilin 1 (FLOT1),  
47 Vacuolar Protein Sorting 26 (VPS26)

48 **SUMMARY**

49 **Biased signaling occurs when different ligands that are directed at the same receptor launch**  
50 **different cellular outcomes. Because of their pharmacological importance, we know the most**  
51 **about biased ligands and little is known about other mechanisms to achieve signaling bias.**  
52 **In the canonical animal G protein system, endocytosis of a 7-transmembrane GPCR**  
53 **desensitizes a cell from an extracellular signal.  $\beta$ -arrestins facilitate GPCR endocytosis but**  
54 **also propagates cytoplasmic signaling depending on the bias. In Arabidopsis, GPCRs are not**  
55 **required for G protein coupled signaling because the heterotrimeric G protein complex**  
56 **spontaneously exchanges nucleotide. Instead, the prototype 7-transmembrane Regulator of**  
57 **G Signaling 1 protein AtRGS1 modulates G signaling and through ligand-dependent**  
58 **endocytosis, de-repression of signaling is initiated but canonical arrestins are not involved.**  
59 **Endocytosis initiates from two separate pools of plasma membrane: microdomains and a**  
60 **clathrin-accessible neighborhood, each with a select set of discriminators, activators, and**  
61 **newly-discovered arrestin-like adaptors. Different trafficking origins and trajectories lead**  
62 **to different cellular outcomes. Thus, compartmentation with its attendant signalosome**  
63 **architecture is a previously unknown mechanism to drive biased signaling.**

64

65 **INTRODUCTION**

66 Different ligands discriminated by the same receptor or utilizing the same core of signaling  
67 elements can set in motion a cascade of events that lead to multiple outcomes. When subsets of  
68 outcomes are ligand-specific, we label this biased signaling. This bias can be encoded in the ligand  
69 structure (biased ligands), in the receptors (biased receptors), or in the interactions between the  
70 signaling components (biased systems) (Smith et al., 2018). Of the three defined mechanisms,

71 biased ligands is the most widely studied because of its immediate pharmacological significance,  
72 such as the development of drugs that provide analgesia without the addictive side effect (Manglik  
73 et al., 2016; White et al., 2015; Wingler et al., 2019). **a) Ligand bias** occurs when a ligand stabilizes  
74 one or few of several conformations of a receptor protein which then preferentially recruits or  
75 activates signaling elements such as arrestin and the heterotrimeric G protein complex that lead  
76 toward one cellular outcome over another (Bohn et al., 2000; DeWire et al., 2013). For example,  
77 some ligands are biased towards arrestin signaling (Charest et al., 2007; Gesty-Palmer et al., 2006;  
78 Shenoy et al., 2006) such as certain dopamine agonists compared to dopamine which is biased  
79 towards D<sub>2</sub>R- $\beta$ -arrestin coupling (Allen et al., 2011). Certain opioid agonists compared to  
80 morphine are biased toward G-protein signaling (DeWire et al., 2013; Rives et al., 2012; White et  
81 al., 2015). **b) Receptor bias** occurs through recognition of the same ligand by multiple receptor  
82 types (Géhin et al., 1999) including so-called decoy receptors (Lin and Hsieh, 2011; Pan et al.,  
83 1997), some of which may in fact be functional receptors that use non-classical signaling pathways  
84 (Lin and Hsieh, 2011; Rajagopal et al., 2010a). Dopamine D<sub>1</sub> and D<sub>2</sub> class receptors recognize  
85 dopamine, but signal through different subunits of G $\alpha$  as well as arrestin (Urs et al., 2017). **c)**  
86 **System bias** involves a cell-mediated shift to one pathway over another by some unknown  
87 mechanism but one possibility is through mass action, for example, making arrestin more abundant  
88 at the receptor than G $\alpha$  or a particular kinase (Urs et al., 2016). This last category of bias signaling  
89 is the least understood and the subject of the present work.

90 Phosphorylation patterns are the chemical bar codes for biased signaling at least for  
91 arrestin-dependent outcomes (Butcher et al., 2011; Nobles et al., 2011; Shiraishi et al., 2018; Yang  
92 et al., 2015; Yang et al., 2017). G-protein coupled Receptor Kinases (GRKs) phosphorylate the C-  
93 terminus or other cytoplasmic elements of GPCRs in response to agonist binding, unlike Protein

94 Kinase A and C that phosphorylate GPCRs in a heterologous manner (Benovic et al., 1986; Sibley  
95 et al., 1987). The subsequent coupling of arrestin to phosphorylated GPCRs does not end G-protein  
96 independent signaling. Arrestin-bound GPCRs further activates multiple kinase pathways  
97 including MAPK and tyrosine kinases (DeFea et al., 2000; Luttrell et al., 2001; Rajagopal et al.,  
98 2010b). While plants lack GRK's, an Arabidopsis family of kinases called WITH NO LYSINE  
99 (**WNK**) Kinase phosphorylate the C-terminal tail of the non-canonical 7-transmembrane  
100 Regulator of G Signaling (**AtRGS1**) in response to extracellular glucose (Fu et al., 2014a; Urano  
101 et al., 2012a). AtRGS1 is also phosphorylated by other kinases including BAK1, a co-receptor for  
102 flg22 which is a Pathogen-Associated Molecular Pattern (PAMP) (Liang et al., 2018; Tunc-  
103 Ozdemir et al., 2017; Tunc-Ozdemir et al., 2016) and loss of AtRGS1 and other G protein  
104 components severely affect resistance in a wide range of pathogens (Zhong et al., 2018). System-  
105 biased signaling may be particularly relevant in plants where AtRGS1 modulates intracellular  
106 signaling transduction through G protein activation. AtRGS1 regulates G protein activation with  
107 ligand discrimination likely facilitated by membrane bound Receptor Like Kinases (RLK's) of  
108 which there are more than 600 members in Arabidopsis (Shiu and Bleecker, 2001).

109 In animals, activation of G Protein signaling results from GDP exchange for GTP on the  
110  $G\alpha$  subunit and subsequent dissociation from the GPCR, wherein this nucleotide exchange is the  
111 rate-limiting step (Ferguson et al., 1986). Desensitization of the cell toward the signal occurs  
112 through endocytosis of the GPCR mediated by arrestins (Benovic et al., 1987; Lohse et al., 1990).  
113 In Arabidopsis, however, the  $G\alpha$  subunit, AtGPA1 spontaneously exchanges nucleotide without a  
114 GPCR thus it is self-activating and it is the intrinsic GTPase activity that is the rate-limiting step  
115 (Johnston et al., 2007; Jones et al., 2011a). AtRGS1 accelerates the intrinsic GTPase of AtGPA1  
116 (Jones et al., 2011b) and as a result, inactive  $G\alpha$  remains bound to GDP until de-repression through

117 AtRGS1 endocytosis, permitting G $\alpha$  activation through nucleotide exchange and subsequent  
118 downstream signal transduction (Urano et al., 2012a). This AtRGS1 endocytosis is a well-  
119 established proxy for sustained G protein activation and the proportion of endocytosed AtRGS1 is  
120 linearly related to the proportion of G protein activation (Fu et al., 2014a). In Arabidopsis, sugars  
121 (Fu et al., 2014a; Grigston et al., 2008) and flg22 (Tunc-Ozdemir et al., 2016) activate AtRGS1  
122 (Urano et al., 2012b).

123         Physically de-coupling AtRGS1 from the heterotrimeric G protein complex by endocytosis  
124 is the crux of the de-repression mechanism, at least for sustained activation. Two modes of  
125 endocytosis in plants are known: Clathrin-Mediated Endocytosis (**CME**) and Sterol-Dependent  
126 Endocytosis (**SDE**) (Fan et al., 2015), however, the protein that directly couples to AtRGS1 and is  
127 responsible for endocytosis (equivalent of arrestin-2 or -3 for GPCRs in animals) is unknown.  
128 Extensive work has been done to elucidate the CME pathway in animal and yeast systems with the  
129 function of many molecular components being well characterized. Of particular interest is the  
130 ADAPTOR PROTEIN COMPLEX-2 (**AP-2**) that is required for recognition and binding of cargo  
131 (Jackson et al., 2010; Kelly et al., 2008; Krauss et al., 2006a), recruiting clathrin to the PM, and  
132 the subsequent formation of clathrin-coated vesicles. In the absence of AP-2 function, clathrin-  
133 coated vesicle formation is reduced and endocytosis is inhibited (Boucrot et al., 2010 ). The AP-2  
134 complex is a heteromeric complex consisting of 2 large subunits ( $\alpha$ 2 and  $\beta$ 2), 1 medium subunit  
135 ( $\mu$ 2), and 1 small subunit ( $\sigma$ 2) (Collins et al., 2002).

136         SDE is a clathrin-independent mechanism for internalization of membrane-associated  
137 proteins. Also referred to as lipid raft endocytosis, SDE of these microdomains requires Flotilin1  
138 (**Flot1**), and possibly the microdomain associated Remorin protein (Raffaele et al., 2009) for  
139 internalization of sterol-rich vesicles (Li et al., 2012b). Membrane proteins PIP2;1 and Respiratory

140 Burst Oxidase Homolog D (**RbohD**) are selectively internalized via sterol-dependent endocytosis  
141 under salt stress conditions (Hao et al., 2014; Li et al., 2011).

142 We present data illustrating a biased system where two distinct extracellular ligands induce  
143 endocytosis of AtRGS1 from separate plasma membrane origins, of which one is mediated by a  
144 previously-undiscovered plant arrestin-like protein, Vacuolar Protein Sorting 26 (VPS26). flg22  
145 initiates AtRGS1 endocytosis via CME, while glucose activates both pathways of endocytosis.  
146 Phosphorylation of AtRGS1 and involvement of individual subunits of the heterotrimeric G  
147 protein complex are also ligand specific as are the immediate downstream consequences. From  
148 the CME-mediated-AtRGS1 origin, flg22 induces a MAPK cascade known to drive transcriptional  
149 reprogramming (Lee et al., 2015), whereas from the SDE-mediated-AtRGS1 origin, glucose  
150 induces transcriptional change that is independent of the MAPK cascade.

## 151 **RESULTS**

### 152 **Biased Signaling by Two Extracellular Signals**

153 To date, there are 2 well-studied signals that directly and rapidly activate the Arabidopsis  
154 heterotrimeric G protein signaling pathway through AtRGS1 endocytosis: **1)** flg22 which is a 22-  
155 amino acid PAMP from the plant pathogen *Pseudomonas syringe* that is recognized on plant cells  
156 to initiate the innate immunity pathway (Asai et al., 2002; Felix et al., 1999; Gómez-Gómez and  
157 Boller, 2000). It is already established that flg22 is perceived extracellularly (e.g. (Jelenska et al.,  
158 2017) by co-receptors BAK1 and FLS2 as part of a larger G protein complex (Sun et al., 2013;  
159 Tunc-Ozdemir and Jones, 2017). **2)** Glucose or a glucose metabolite which is a product of  
160 photosynthesis (Tunc-Ozdemir et al., 2018) and metabolism of starch stores (Pharr and Keller,  
161 2017). An AtRGS1-mediated extracellular site of perception of glucose or its metabolite has not  
162 yet been shown.

163 Many sugars, although primarily sucrose, are transported extracellularly in the apoplastic  
164 space where they are converted to glucose by cell wall localized invertases and potentially further  
165 metabolized to a signal. These sugars are rapidly taken up through a large family of transporters  
166 (Chen et al., 2010; Williams et al., 2000) where they are detected in the cytoplasm, but some sugars  
167 may also be detected extracellularly (Li and Sheen, 2016). D-glucose or its metabolite induces  
168 rapid endocytosis of AtRGS1-dependent sugar signaling (Fu et al., 2014a; Urano et al., 2012a) and  
169 because AtRGS1 shares the membrane topology of GPCRs that perceive extracellular signals, it  
170 has been assumed that the extracellular glucose or metabolite is perceived by the AtRGS1/G  
171 protein complex. However, neither an extracellular site for perception nor direct evidence for  
172 agonist binding to AtRGS1 has been shown. To address the former, impermeant sugars were  
173 tested for the ability to activate G signaling.

174 The glucose-fructose disaccharide 6-0- $\alpha$ -D-glucopyranosyl-D-fructose (aka isomaltulose,  
175 pallatinose), is presumed not to be transported across the plant cell membrane although it acts as  
176 an active glucose precursor if synthesized intracellularly (Loreti et al., 2000; Sinha et al., 2002).  
177 While the expression of sucrose isomerase in potato increased apoplastic isomaltulose, transport  
178 across any membrane has yet to be demonstrated (Börnke et al., 2002). Importantly, isomaltulose  
179 is not hydrolyzed extracellularly (Ferne et al., 2001; Wu and Birch, 2011). To determine if  
180 isomaltulose is impermeant to the plasma membrane, we chemically synthesized [ $^{14}$ C]  
181 isomaltulose (Figure S1A) and tested for uptake into Arabidopsis seedlings. Isomaltulose was at  
182 least 9-fold less permeant to cells than glucose (Figure S1B). Therefore, to determine if sugars are  
183 perceived extracellularly by hypocotyl cells, we tested the effect of isomaltulose on AtRGS1-YFP  
184 endocytosis (Figure 1A) as a validated proxy for activation of G signaling as previously shown  
185 (Fu et al., 2014a; Urano et al., 2012a). Whereas several mono and disaccharides failed to activate



186 G signaling, extracellular isomaltulose caused AtRGS1 internalization statistically ( $P < 0.01$ ) more  
187 effectively than D-glucose (**Figure 1B**) despite being transported ~10-fold less suggesting that  
188 isomaltulose activates AtRGS1 extracellularly. Turanose is another disaccharide that is thought to  
189 be perceived extracellularly (Loreti et al., 2000) and is impermeant (Rolland et al., 2002) therefore  
190 endpoint analysis was performed using this sugar, and just as for both glucose and isomaltulose,  
191 turanose activated G signaling (**Figure 1C**). Isomaltulose and turanose are disaccharides that share  
192 a glucose ring (**Figure 1D**), suggesting that glucose or a glucose metabolite is the discriminated  
193 signal or is important for a metabolic agonist (e.g. sugar nucleotides).

#### 194 **AtRGS1 Endocytic Pathway is Signal Biased**

195 Having shown that extracellular flg22 is detected by BAK1/FLS2 (Chinchilla et al., 2006; Gómez-  
196 Gómez and Boller, 2000; Tunc-Ozdemir et al., 2016) and induces AtRGS1 endocytosis (Tunc-  
197 Ozdemir et al., 2016) and that extracellular D-glucose acts upstream of AtRGS1 endocytosis, both  
198 requiring at least in part the phosphorylation of AtRGS1 at its C terminal tail (Tunc-Ozdemir et  
199 al., 2016; Urano et al., 2012a), we turned to the question of whether these two signals activate the  
200 same pool of AtRGS1. Endocytosis in plants utilizes two primary pathways: CME and SDE. Both  
201 pathways have been individually associated with the activity of specific proteins and responses  
202 (Adam et al., 2012; Dhonukshe et al., 2007; Irani et al., 2012; Li et al., 2012b); for example, CME  
203 and SDE cooperatively regulate the activity of RbohD in the flg22 pathway (Hao et al., 2014). We  
204 used super resolution microscopies to achieve the needed spatial and temporal resolution to answer  
205 quantitative differences in signal-induced activation. To determine if one or both pathways  
206 regulate AtRGS1 activity at the membrane, we induced internalization with D-glucose and *flg22*  
207 while simultaneously inhibiting the CME pathway by arresting AP2 $\mu$  function with  
208 TyrphostinA23 (**TyrA23**) (Banbury et al., 2003; Dhonukshe et al., 2007) or inhibiting the SDE

209 pathway by suppressing microdomain formation via sterol solubilization with methyl- $\beta$ -  
210 cyclodextrin (**M $\beta$ CD**) (Ilangumaran and Hoessli, 1998; Ohtani et al., 1989). M $\beta$ CD, even at great  
211 excess, did not block *flg22*-induced AtRGS1 internalization compared to the control ( $p < 0.01$ )  
212 (**Figure 2A**). Conversely, AtRGS1 internalization induced with glucose was reduced 50% with a  
213 minimum concentration of 5mM M $\beta$ CD (**Figure 2B**). This suggests that half of the D-glucose-  
214 regulated pool of AtRGS1 is located in a SDE domain. To determine if the CME pathway regulates  
215 AtRGS1 activity, we applied TyrA23 with *flg22* or D-glucose. AtRGS1 internalization with both  
216 activators was significantly reduced ( $p < 0.01$ ); completely for *flg22*-induced AtRGS1 endocytosis  
217 (**Figure 2C**) and by 50% for D-glucose-induced AtRGS1 endocytosis (Figure 2D). The structurally  
218 similar but inactive TyrA23 analog TyrphostinA51 showed no significant effect on AtRGS1  
219 internalization ( $p < 0.01$ ) (**Figure 2C and 2D**, TyrA51), indicating that the inhibitory effect of  
220 TyrA23 is chemically specific (Banbury et al., 2003). When both inhibitors were applied  
221 simultaneously with glucose, AtRGS1 internalization was ablated (**Figure 2E**). These results  
222 suggest that there is a single *flg22*-induced pool that internalizes through a CME pathway and that  
223 there are two distinct glucose-induced pools, one internalizes through the CME pathway and the  
224 other through the SDE pathway. Because the glucose-induced pool is equally inhibited by the  
225 CME and SDE inhibitors, a rapid equilibrium between the pools is not likely, otherwise neither  
226 inhibitor would have shown efficacy.

227 To further test our hypothesis of ligand-dependent membrane origins of AtRGS1  
228 endocytosis, we used a genetic approach by measuring AtRGS1 internalization in the AP-2 $\mu$  null  
229 mutant, *ap2m* (Kim et al., 2013). The AP-2 complex plays a critical role in transporting cargo in  
230 the CME pathway, whereby the  $\mu$  subunit of this tetrameric AP-2 complex directly interacts with  
231 cargo proteins during endocytosis (Bashline et al., 2013; Krauss et al., 2006b). In the *ap2m* mutant

232 seedlings, flg22-induced AtRGS1 internalization was ablated ( $p < 0.01$ ), matching previous results  
233 with TyrA23 (Figure 2F). In contrast, glucose resulted in less AtRGS1 internalization in the *ap2m*  
234 mutant compared to Col-0 wild type ( $p < 0.01$ ). The addition of M $\beta$ CD with glucose ablated  
235 AtRGS1 internalization in the *ap2m* mutant to basal levels (Figure 2G). These observations are  
236 consistent with two signal-dependent pools of AtRGS1 on the plasma membrane; a homogenous  
237 pool for flg22 signaling and a conglomerate pool for D-glucose signaling.

### 238 **A Point Mutation in the 7 Transmembrane Domain Disarms Biased Signaling**

239 The  $\mu$  subunit of the AP-2 complex is a cargo recognition and interaction component in the CME  
240 pathway. It binds to known tyrosine motifs, YXX $\Phi$ , where X is any amino acid and  $\Phi$  is an amino  
241 acid with a hydrophobic side chain (Ohno et al., 1995). The second cytoplasmic loop in AtRGS1  
242 contains such a motif with the amino acid sequence Y<sup>112</sup>FIF (Chen et al., 2003). To determine if  
243 this motif is necessary for AtRGS1 endocytosis and a potential binding motif for AP-2 $\mu$ , we  
244 generated AtRGS1 with a tyrosine to alanine mutation (AtRGS1<sup>Y112A</sup>). flg22 failed to induce  
245 endocytosis of the AtRGS1<sup>Y112A</sup> mutant (Figure 2H). D-Glucose-induced internalization of the  
246 AtRGS1<sup>Y112A</sup> was reduced to half ( $p < 0.05$ ) compared to wild type internalization and was further  
247 reduced to the resting level with the addition of M $\beta$ CD ( $p < 0.01$ ) (Figure 2I) demonstrating that  
248 the Y<sup>112</sup>FIF is necessary for internalization and likely a recognition and binding site for AP-2 $\mu$ .  
249 The flg22-induced AtRGS1 pool is entirely mediated by the CME pathway whereas roughly half  
250 of the D-glucose-induced AtRGS1 pool internalizes through the CME pathway.

### 251 **Physically-Distinct, Dynamic Populations of AtRGS1: Architectural Basis for Biased** 252 **Signaling**

253 We showed through pharmacological and genetics approaches that two signal-dependent pools of  
254 AtRGS1 exist raising the possibility that the two AtRGS1 pools are physically distinct on the cell

255 membrane. The differential dependence on sterol and clathrin for partial glucose- vs. flg22-  
256 induced endocytosis of AtRGS1 suggests this is the case. To test this hypothesis, we imaged  
257 AtRGS1 with a GFP C-terminal tag using Total Internal Reflection Microscopy (TIRF) and  
258 IMARIS (v9.2.2, Bitplane Inc) surface tracking (Figure S2 A-E, examples of raw data). We  
259 calculated the average size and speed of AtRGS1 proteins during a 30-second interval taken from  
260 time-lapse imaging at 5 and at 15 minutes post treatment with glucose and flg22. Two clearly  
261 distinct signal-dependent populations of AtRGS1 were observed (Figure 2J). After 5 minutes under  
262 glucose conditions, the surface area of AtRGS1-GFP clusters were significantly larger ( $\bar{x} = 0.9403$   
263  $\mu\text{m}^2$   $n=4619$ ) than flg22 at ( $\bar{x} = 0.5998 \mu\text{m}^2$   $n=2026$ ) (Figure 2J inset) ( $p<0.01$ ). At 15 minutes,  
264 the area of flg22 treated AtRGS1-GFP increased slightly to  $0.6733 \mu\text{m}^2$  ( $n=1751$ ), with glucose  
265 treated AtRGS1-GFP, the area increased to  $1.0072 \mu\text{m}^2$  ( $n=6209$ ) (Figure S2 F-H). Velocity  
266 differences for AtRGS1-GFP remain consistent between 5 and 15 minutes with flg22-treated  
267 AtRGS1 averages at  $1.53\mu\text{m/s}$  and  $1.63\mu\text{m/s}$ , respectively ( $n= 2026$  and  $1751$ ) and glucose-treated  
268 AtRGS1 averages at  $0.98\mu\text{m/s}$  and  $1.01\mu\text{m/s}$  at 5 and 15 minutes, respectively ( $n= 4619$  and  $6209$ ).  
269 Two populations of differently sized AtRGS1 protein clusters provides structural support for two  
270 origins of endocytosis.

271

### 272 **The Signal Dependency Correlates with Endocytosis Marker Redistribution**

273 The Clathrin Light Chain (CLC) and Flot1 proteins are associated with CME and SDE,  
274 respectively (Fan et al., 2015; Li et al., 2012a). We generated transgenic lines expressing AtRGS1-  
275 GFP with either CLC-mCherry or Flot1-mCherry endocytosis markers to investigate the  
276 localization of AtRGS1 in relation to both markers. We imaged the response of both endocytosis  
277 markers 5 minutes after application of water, flg22, and glucose to look for changes in marker

278 distribution in the cell (Figure 2K-P). Using Manders Overlap Coefficient, we quantified the co-  
279 occurrence of both endocytosis markers with AtRGS1-GFP under all treatment conditions. We are  
280 using Manders instead of Pearson's Correlation because our qualitative analysis shows a ligand  
281 dependent change in marker localization and shape. We simply want to quantify the change in  
282 overlap of the two signals (Manders) and not the change in signal intensity (Pearsons) that may  
283 simply be a result of AtRGS1 internalization and not correlated to direct interaction with either  
284 endocytosis marker.

285 A subset of the Manders Overlap Coefficients after background subtraction are shown in  
286 Figure 2Q-V and correspond to the confocal micrographs in Figure 2K-P. M1 represents the  
287 percentage of total GFP that overlaps with mCherry. Similarly, M2 represents the percentage of  
288 total mCherry for CLC or FLOT1 that overlaps with GFP. Under conditions with no signaling  
289 ligand (Figure 2K and 2N), RGS1-GFP and our endocytosis markers have a high overlap baseline  
290 (Figure 2Q and 2R). Due to the restrictive cytoplasmic space, we believe this is not functional  
291 interaction, merely fluorescence overlap due to high protein crowding and resolution limitations.  
292 After flg22 addition (Figure 2L and 2O), the proportion of CLC associated with RGS1 decreased,  
293 with the proportion of RGS1 overlapping with CLC also decreasing significantly ( $p < 0.01$ ) (Figure  
294 2S). Simply stated, a smaller defined subset of the RGS1 and CLC populations are overlapping  
295 with each other in a ligand-dependent manner with the endocytosis marker also exhibiting a  
296 structural change. This response was not observed with FLOT1 when flg22 was added (Figure  
297 2T). With glucose addition (Figure 2M and 2P) CLC showed no significant change compared to  
298 water (Figure 2U), while FLOT1 overlap decreased with RGS1 compared to the water baseline  
299 ( $p < 0.01$ ) (Figure 2V). The same responses were observed at 15 minutes post ligand addition  
300 (Figure S2 I-T). The averages for the entire collection of M2 scores from all samples are presented

301 in **Figure 2W**. These results indicate that endocytosis markers are responding to specific ligands  
302 and subsets of the total marker and AtRGS1 protein populations are overlapping in a signal specific  
303 manner. In summary, the different intrinsic trafficking properties further support at least two pools  
304 of ligand-activated AtRGS1.

### 305 **Signaling Bias Involves Phosphorylation from Different Kinases.**

306 Phosphorylation of AtRGS1 is a necessary requisite for both glucose- and flg22-induced  
307 endocytosis. The C-terminus of AtRGS1 contains multiple di-serine residues that could serve as  
308 potential phosphorylation sites for signal transduction. A truncated version of AtRGS1 lacking the  
309 43 most C-terminal residues, AtRGS1<sup>ΔCt</sup>, served as a blunt phosphorylation-deficient mutation to  
310 determine if the C-terminal tail, in particular any C-terminal serines located there are necessary  
311 for AtRGS1 endocytosis (Figure S4A). Application of flg22 failed to internalize the AtRGS1<sup>ΔCt</sup>  
312 mutant compared to water control (p<0.01) (**Figure 3A**). Glucose application however, internalized  
313 the AtRGS1<sup>ΔCt</sup> mutant, but at 50% the level of the wild type AtRGS1 (p<0.01). MβCD completely  
314 inhibited internalization of the AtRGS1<sup>ΔCt</sup> mutant levels (p<0.01) (**Figure 3B**). These results show  
315 that the C-terminus is necessary for flg22- and glucose-induced endocytosis of AtRGS1 and  
316 support two subpopulations of AtRGS1 among the glucose-induced pool.

317 Three phosphorylated serine residues on the C-terminus of AtRGS1 at positions 428, 435,  
318 and 436 are necessary for at least partial endocytosis of AtRGS1 induced by both glucose and  
319 flg22. Therefore, we mutated these serines to alanine (AtRGS1<sup>3SA</sup>) to determine if those specific  
320 residues were necessary to induce internalization by either agonist. Upon treatment with flg22,  
321 AtRGS1<sup>3SA</sup> internalization was at basal levels compared to wild type (p<0.01) (**Figure 3C**),  
322 confirming previous results by Tunc-Ozdemir *et al* (Tunc-Ozdemir et al., 2016) and suggesting  
323 that the CME pathway is dependent on phosphorylation of serines 428, 435 and/or 436. In the case

324 of glucose, endocytosis was only partially impaired by the AtRGS1<sup>3SA</sup> mutant ( $p < 0.01$ ) (Figure  
325 3D). M $\beta$ CD completely blocked glucose-induced endocytosis of the AtRGS1<sup>3SA</sup> mutant (Figure  
326 3D), consistent with our previous results that show glucose-induced internalization utilizes both  
327 CME and SDE pathways and that the CME pathway requires phosphorylation at Ser<sub>428/435/436</sub>.

328 These results enable us to exclude an osmotic effect that effectively sequesters a portion of  
329 the plasma membrane pool of AtRGS1 into a sterol-dependent, or at least an M $\beta$ CD-inhibitable,  
330 microdomain that is incapable of internalizing its components. If an osmotic effect occurred, the  
331 presence of M $\beta$ CD would have prevented formation of these microdomains and consequently the  
332 sequestration of AtRGS1 for the endocytic pool would cause 100% internalization by glucose.  
333 This was not observed.

### 334 **System Bias by Skewed Kinase and G-protein Complex Composition**

335 Because the cluster of phosphorylated serines on the C-terminus of AtRGS1 are required for  
336 AtRGS1 internalization, we hypothesize that one mechanism for system bias is to functionally-  
337 sequester cognate kinases for glucose and flg22 in their respective ligand-delineated pools. To test  
338 this hypothesis, we quantified AtRGS1 internalization in the mutant backgrounds of the flg22-  
339 activated FLS2 kinase (*fls2*) and BAK1 co-receptor (*bak1*) and the D-glucose-activated WNK  
340 kinase (*wnk8-2*, *wnk1-1*) null mutants. Upon treatment with flg22, AtRGS1 endocytosis was  
341 ablated in *fls2* and *bak1-4* mutants ( $P < 0.01$ ), while glucose-induced internalization in these  
342 mutants was unaffected ( $P > 0.05$ ) (Figure 3E and 3F). In contrast, D-glucose-induced  
343 internalization in the *wnk8-2* was ablated, while flg22-induced AtRGS1 endocytosis was  
344 unaffected ( $P = 0.89$ ) (Figure 3G). Interestingly, a low dose, long duration application of 2%  
345 glucose over 6 hours to *wnk1-1* had no discernable affect compared to wild type (Figure S3A),  
346 prompting a revisit of the proposed mechanism that WNK1 mediates low dose-long duration

347 activation by glucose (Fu et al., 2014a). Our results suggest that FLS2 and BAK1 are specific to  
348 the CME pathway and WNK8 is specific to the SDE pathway.

349 The canonical components of the heterotrimeric G protein complex are necessary for  
350 glucose-induced internalization of AtRGS1 (Fu et al., 2014a; Urano et al., 2012a). More  
351 specifically, G $\beta\gamma$  is required for the recruitment of WNK kinases for phosphorylation of AtRGS1,  
352 leading to AtRGS1 endocytosis and activation of downstream G signaling. We hypothesized that  
353 individual components of the G protein heterotrimer may be required for biased signaling. To test  
354 this hypothesis, we quantified AtRGS1 endocytosis in G protein mutant backgrounds after flg22  
355 and glucose activation. In the AtGPA1 (G $\alpha$ ) null background, *gpa1-4*, AtRGS1 endocytosis  
356 showed no significant difference compared to wild type when glucose was applied ( $p < 0.01$ )  
357 (Figure 3H). After addition of flg22, however, AtRGS1 endocytosis was at basal levels ( $p < 0.01$   
358 value) in the absence of G $\alpha$  indicating that the G subunit is essential for this pathway (Figure 3H).  
359 We additionally tested AtRGS1 in the absence of XLG2, one member of a three-gene family of  
360 atypical, G proteins. XLG proteins have a homologous C-terminal G $\alpha$  domain and N-terminal  
361 nuclear localization signal (Ding et al., 2008). Loss of XLG2 in the *xlg2-1* mutant, did not affect  
362 AtRGS1 endocytosis by glucose application ( $p = 0.43$ ), but completely inhibited AtRGS1  
363 endocytosis to basal levels after addition of flg22 ( $p < 0.01$ ) (Figure 3I). Additionally, low dose,  
364 long duration glucose application had no effect in the *xlg2-1* mutant compared to wild type (Figure  
365 S3B). In the *agb1-2/aggl* double null mutant, AtRGS1 endocytosis was diminished after addition  
366 of flg22 ( $p < 0.01$ ) (Figure 3J). Loss of the G $\beta\gamma$  dimer in the *agb1-2/aggl* mutant had no effect on  
367 glucose-induced AtRGS1 endocytosis compared to wild type after 30 minutes of treatment with  
368 6% D-glucose ( $p < 0.01$ ) (Figure 3J). Interestingly, a 2% - 6 hour application of D-glucose required  
369 AGB1/AGG1 for activation (Figure 3K).



370 **VPS26 Is a Novel Plant  $\beta$ -arrestin-like Adaptor Necessary for AtRGS1 Endocytosis in the**  
371 **CME Pathway: Discovery and Validation**

372 In the animal G signaling pathway, GPCR endocytosis results in  $\beta$ -arrestin-mediated  
373 desensitization of the cell from an extracellular signal. Because plant genomes do not encode  
374 canonical arrestins, we sought candidate adaptors for AtRGS1 that may function like  $\beta$ -arrestins  
375 to recruit AP2/clathrin to AtRGS1 for endocytosis by querying 3-D structure databases. As shown  
376 in **Figure S4A and B**, we identified three *Arabidopsis* VACUOLAR PROTEIN SORTING 26  
377 (VPS26) proteins that contain arrestin folds (Oliviusson et al., 2006) and are orthologous to human  
378 VPS26. *Arabidopsis* VPS26A and VPS26B amino acid sequences are 91% identical whereas  
379 VPS26-like is 20% identical to VPS26A and VPS26B. In mammals and plants, VPS26 interacts  
380 with VPS29 and VPS35 in the retromer complex on the endosome (Zelazny et al., 2013). This  
381 raises the possibility that VPS26 proteins have a moonlighting function in modulating AtRGS1  
382 internalization.

383 To compare the arrestin and AtVPS26A protein structures, we first created a model of  
384 AtVPS26A using MODELLER (Martí-Renom et al., 2000). Toward this, a high quality  
385 homogeneous sequence alignment was generated using the VPS26 family (*Arabidopsis* VPS26A,  
386 VPS26B, VPS26like and *Homo sapiens* VPS26A) and arrestin family (Vertebrates: Human  
387 arrestin-1 and arrestin-2; bovine arrestin-1, arrestin-2, arrestin-2, and a variant p44; Squid arrestin-  
388 1; and the invertebrate shrimp arrestin (**Figure S5A**). Human, bovine, and squid sequences were  
389 included because PDB structures are available. The squid and shrimp sequences were added for  
390 divergence information (among the opisthokonts). AtVPS26A and human VPS26A share 56.48%  
391 sequence identity while AtVPS26A and arrestin share 14-17% sequence identities (**Figure S5B**).  
392 These results support the use of the high-resolution (2.1Å) crystal structure of *Homo sapiens*

393 Vps26a (PDB [2FAU]) to generate models of AtVPS26A. Details of the top five selected models  
394 are provided in the Methods.

395 We compared the atvps26a-2 model with the bovine arrestin-3 (PDB [3P2D (Zhan et  
396 al., 2011)] ). Although the primary amino acid identity between arrestin and AtVPS26A is only  
397 ~15% (Figure 4A), the structure of AtVPS26A model shows a remarkably similar arrestin scaffold  
398 with arrestin in which contains a semi-symmetric fold of two  $\beta$  strand sandwich structures in the  
399 N domain and C domains linked by the central loops with each sandwich formed by 3 or 4  $\beta$  sheets,  
400 respectively.

401 For arrestin, the conserved structures mainly include the N-terminal and C-terminal arm,  
402 central crest comprised of a finger loop (Hirsch et al., 1999), a middle loop (Kim et al., 2012;  
403 Shukla et al., 2013); see box ii of Fig. 4) and C loop (Kang et al., 2015) see box I of Fig. 4), Figure  
404 4A), the gate loop, polar core, and the hinge domain (Peterson and Luttrell, 2017). The N-terminal  
405 and C-terminal arms stabilize the arrestin conformation. Model atvps26a-2 shares similar N-  
406 terminal and C-terminal scaffolds with arrestin however it lacks a short  $\alpha$ -helix inside the arrestin  
407 N-terminal domain (Figure 4B) which has been implicated in receptor binding (Vishnivetskiy et  
408 al., 2011). In addition, arrestin has a longer C-terminal tail, which extend all the way to bind the  
409 N terminal domain, important for linkage to enable CME. The C terminus of atvps26a-2 has no  
410 extension. Some arrestins also have a short C-tail (Gurevich and Gurevich, 2006).

411 The overall central crest of atvps26a-2 is similar with that of arrestin which includes the  
412 finger loop, middle loop and the C loop (Figure 4C). While arrestin has a longer finger loop  
413 important for receptor binding. The rearrangement of the finger loop is a major change associated  
414 with arrestin activity, likely serving as a critical part of the activation sensor (Chen et al., 2018).

415           The polar core is the key component of the phosphate sensor. In arrestin, the polar core is  
416 comprised of five charged side chains including two Arg and three Asp that are essential to its  
417 activation (Vishnivetskiy et al., 1999). The residues in the polar core of bovine arrestin-3 are:  
418 Asp<sub>27</sub>, Arg<sub>170</sub>, Asp<sub>291</sub>, Asp<sub>298</sub> and Arg<sub>393</sub> (Figure 4D and E). The human vps26A also contains a  
419 polar core between the N terminal and C terminal domains which includes the N domain residues  
420 Glu<sub>119</sub> and Tyr<sub>121</sub>, and C domain residues Lys<sub>213</sub>, Glu<sub>215</sub>, Thr<sub>258</sub>, Tyr<sub>272</sub>, and Arg<sub>296</sub> (Shi et al.,  
421 2006). The residues of the polar core of VPS26 are conserved suggesting that they play a critical  
422 role in protein function. We thus labeled the polar core of atvps26a according to the human vps26a  
423 template. The residues of atvps26a are the N-domain residues Glu<sub>118</sub> and Tyr<sub>120</sub>, and C domain  
424 residues Arg<sub>213</sub>, Glu<sub>215</sub>, Thr<sub>258</sub>, Tyr<sub>272</sub>, and Arg<sub>296</sub> (Figure 4 F and G). Although different amino  
425 acid composition, both cores consist of positive charged residues and allow the formation of  
426 hydrogen bonds under physiological conditions. However, the orientation and shape of the polar  
427 core of VPS26 is distinct from arrestin. The arrestin polar core is embedded between  $\beta$  sheets in  
428 the N terminal domain whereas the VPS26 core is open and elongated, spanning the length of  
429 space between the N domain and C domain.

430           The most divergent arrestin structure from 3P2D is a 3Å-resolved truncated arrestin from  
431 squid (PDB 1CF1, (Bandyopadhyay et al., 2018). Unlike for bovine arrestin, the C-tail interaction  
432 with the gate loop of the polar core is weak and flexible. This functional divergence tempers the  
433 impact of the lack of a long C-tail in the atvps26a-2 model.

434           Taken together, these similarities between AtVPS26 and arrestin prompted the hypothesis  
435 that AtVPS26 is a candidate adaptor for CME of AtRGS1. Therefore, we isolated null alleles of  
436 the three VPS26 genes in Arabidopsis: VPS26A, VPS26B, and VPS26-LIKE (aka VPS26C) (Jha  
437 et al., 2018; Zelazny et al., 2013) and phenotyped the hypocoty length at 5 days, the relevant stage

438 for our cytological analyses. As shown in Figure S4F, there were no qualitative differences  
439 between VPS26 null mutants and Col-0 precluding any developmental basis for alterations in  
440 AtRGS1 activation in these mutants. In addition, the AtRGS1-YFP reporter was combined with  
441 the mutant backgrounds through generating stable transformants. As shown in Figure 4H, loss of  
442 either VPS26A or VPS26B dramatically reduced the flg22-induced internalization of AtRGS1 to  
443 levels that are not statistically different from the baseline level ( $p=0.34$ ). Loss of VPS26-like had  
444 no statistical effect on AtRGS1 internalization by flg22 ( $p=0.65$ ). Loss of any of the three VPS26  
445 proteins had no statistical effect on glucose-induced internalization of AtRGS1 ( $p<0.001$ ). To  
446 confirm that VPS26 is not involved in glucose-induced AtRGS1 internalization, we quantitated  
447 the CME and SDE portions of this trafficking pathway in the *vps26* mutants. As shown in Figure  
448 4I, in each of the *vps26* mutant backgrounds, both the TyrA23A and M $\beta$ CD-inhibitable segments  
449 of the glucose-induced internalization of AtRGS1 remained intact. This suggests that the TyrA23-  
450 dileneated (CME) pathway used by AtRGS1 when activated by flg22 differs from the TyrA23A-  
451 dileneated pathway activated by D-glucose.

452 The genetic data suggest that VPS26A and B form dimers. To test if VPS26 A and B  
453 subunits heterodimerize *in vivo*, BiFC analysis was conducted and showed that heterodimers can  
454 form from ectopically-expressed monomers and suggested that the orientation is head-to-tail  
455 (Figure 5A). Self-association of arrestin family members also occurs and may be part of a  
456 regulatory mechanism for arrestin activation (Chen et al., 2014). For relative quantitation of *in*  
457 *vivo* interaction, split luciferase was performed and found that the strongest interaction was  
458 between VPS26A and VPS26B (Figure 5B). VPS26B dimers could form under these conditions  
459 but not VPS26A dimers or any oligomer with VPS26Like subunits. We have yet to find conditions  
460 which allow stable expression of VPS26 subunits tagged with a full-length auto-fluorescent protein

461 consistent suggesting that the additional mass of the tag prevents dimer formation and that  
462 monomers are unstable.

463 To test if the full-length AtRGS1 protein interacts with the VPS26 subunits *in vivo*, BiFC,  
464 split luciferase, and Y2H analyses were performed. Fluorescent complementation of YFP by  
465 AtRGS1-nYFP with cYFP-VPS26A and with VPS26B-cYFP was observed (Figure 5C). The split  
466 luciferase assay confirmed that this interaction is as strong as the interaction between AtGPA1 and  
467 its AGB1/AGG1 partner (Figure 5D). Finally, Y2H showed that the interaction between AtRGS1  
468 and VPS26 is direct. The entire C-terminal half of AtRGS1 (thus lacking the 7 TM domain)  
469 interacts with VPS26B. Surprisingly, removal of the post RGS-box C-terminal tail which includes  
470 the Ser<sub>428,435,436</sub> phosphorylation cluster did not ablate this interaction however, additional loss of  
471 two other phosphorylated Ser located between helices VII and VIII of the RGS box completely  
472 abolished the interaction.

473

#### 474 **Biased Signaling Outputs**

475 While both D-glucose and flg22 result in different RGS1-YFP trafficking, we asked what other  
476 signaling outputs distinguish these ligands. Two rapid events of the flg22 response is the induction  
477 of MITOGEN ACTIVATED PROTEIN KINASE 6 (MPK6) activity and Ca<sup>2+</sup> signaling (Ranf et  
478 al., 2011). To test the impact of flg22 and D-glucose on MPK6 activity in etiolated hypocotyls, we  
479 employed a FRET-based sensor that measures kinase activity specifically for MPK6, called Sensor  
480 *Of MAPK Activity* (SOMA) (Zaman et al., 2019). We used SOMA lines tagged with either the  
481 human immunodeficiency virus 1 (HIV-1) nuclear export signal (SOMA-NES) or the SV40  
482 nuclear localization signal (SOMA-NLS) (Kalderon et al., 1984; Wen et al., 1995) to measure  
483 MPK6 activity in the cytosol or nucleus, respectively. Because these reporters have not been not

484 validated in hypocotyl epidermal cells, it was necessary to test FRET efficiency in the SOMA lines  
485 in response to 150 mM NaCl as a positive control (Droillard et al., 2004). FRET efficiency  
486 increased rapidly in SOMA-NES and SOMA-NLS in response to NaCl with no response observed  
487 when treated with water (Fig S5 A-D). Additionally, flg22 treatment did not cause substantial  
488 FRET efficiency changes in negative control reporter lines: SOMA<sup>T679A</sup>-NES or SOMA<sup>T679A</sup>-NLS,  
489 which contain mutations in the known phosphorylation site of SOMA that are necessary for FRET  
490 changes (Fig S5 E, F). As shown in Figures 5E and F, rapid FRET gains were observed in both  
491 SOMA-NES and SOMA-NLS within 2-4 minutes after treatment with flg22. When treated with  
492 6% D-glucose, no change in FRET efficiency was observed, suggesting that D-glucose does not  
493 induce activity of MPK6 (Fig 5G and H).

494 To determine if CME-mediated endocytosis regulates flg22-induced MPK6 activity, we  
495 pretreated SOMA-NES lines with TyrA23. TyrA23 successfully blocked the increases in FRET  
496 efficiencies that were observed in the absence of the inhibitor (Fig 5 E, replicates in Fig 5 S5 G-  
497 N). The negative control TyrA51 showed no significant effect on FRET efficiency after treatment  
498 with flg22 (Fig S5 P-V), indicating that the inhibitory effect of TyrA23 is specific to its role in  
499 blocking CME-mediated endocytosis and suggesting that AtRGS1 endocytosis, per se, is required.  
500 However, we do not exclude the possibility that within the context of flg22-induced MAPK  
501 signaling that some other CME-mediated step is rate-limiting.

502 Because D-glucose utilizes both CME and sterol-dependent pathways to induce AtRGS1  
503 internalization, we tested if the depletion of CME pools of AtRGS1 by D-glucose would alter  
504 flg22-induced MPK6 activation. After pretreating SOMA-NES lines with D-glucose for 30  
505 minutes prior to imaging, we found that D-glucose did not have an effect on flg22-increased FRET

506 efficiency (Fig 5G inset) suggesting that the glucose pool of AtRGS1 is sequestered from the flg22-  
507 induced CME of AtRGS1.

508 We tested the role of D-glucose and flg22 in triggering an increased  $\text{Ca}^{2+}$  transient response  
509 using the intensity-based  $\text{Ca}^{2+}$  sensor R-GECO1, a red-shifted intensity-based  $\text{Ca}^{2+}$  reporter  
510 (Keinath et al., 2015). We used stable transgenic Arabidopsis lines in wild type and *rgs1-2*  
511 backgrounds expressing cytosolic- and nuclear-localized R-GECO1. For our assay, D-glucose and  
512 flg22-induced  $\text{Ca}^{2+}$  signals in wild type and *rgs1-2* plants were measured over a time course in  
513 etiolated hypocotyls and normalized against the untreated samples (Fig 5 I, J).  $\text{Ca}^{2+}$  levels  
514 represented by fractional fluorescence changes ( $\Delta F/F$ ; the difference between the fluorescence  
515 intensity before and after flg22 application/ initial fluorescence intensity) increased in wild type  
516 ( $p < 0.01$ ) while  $\Delta F/F$  was greatly diminished ( $\sim 0.01$ ) in the *rgs1-2* mutant in response to flg22. D-  
517 glucose treatments did not significantly alter the  $\Delta F/F$  in Col-0 wild type or *rgs1-2* mutant,  
518 suggesting that D-glucose does not utilize AtRGS1 in a  $\text{Ca}^{2+}$  branch of the pathway. Despite both  
519 D-glucose and flg22 inducing AtRGS1-internalization, these results show that within this context,  
520 only flg22 is capable of inducing MPK6 activity and  $\text{Ca}^{2+}$  changes.

521 While D-glucose signaling mediated by AtRGS1 does not involve MAPK or  $\text{Ca}^{2+}$   
522 branches, it does elicit a cellular change; specifically, changes in expression of a small set of genes  
523 (Grigston et al., 2008; Urano et al., 2012a). *TRICHOMELESS LIKE 26 (TBL26)* was shown to be  
524 induced by glucose in an AtRGS1/G protein complex-dependent manner (Grigston et al., 2008)  
525 and since has been used as a reporter for activation (Fu et al., 2014a; Urano et al., 2016; Urano et  
526 al., 2012a). The loss of AtRGS1 inhibits TBL26 expression indicating that genetically, AtRGS1 is  
527 a positive modulator of signaling, contradictory to our understanding that RGS proteins negatively  
528 modulate G protein activation. One solution to this paradox is that endocytosis of AtRGS1 is

529 required for signal propagation. To test this, we quantitated glucose-induced TBL26 expression in  
530 the presence of TyrA23 and found that expression is dramatically reduced. This is consistent with  
531 the notion that AtRGS1 signaling has an endosomal origin, analogous to some GPCRs (Eichel and  
532 von Zastrow, 2018).

## 533 **DISCUSSION**

534 The key finding in this study is system bias wherein a single receptor-like RGS protein modulates  
535 different quantifiable signaling outputs from two distinct signal inputs (**Figure 7A**). All of the  
536 measured signal outputs correspond to a specific ligand input. For example, flg22 induces ROS,  
537 Ca<sup>2+</sup> release (**Figure 6I-K**), and MAPK signaling (**Figure 6E-H, K**) whereas D-glucose or its  
538 metabolite has a measured effect on gene expression (**Figure 6L**). For flg22, all members of the G  
539 protein heterotrimer, along with XLG2 and VPS26A/B are necessary for CME of AtRGS1.  
540 Additionally, specific phosphorylation of di-serines at the AtRGS1 C-terminus is required. What  
541 is interesting is that glucose signaling that transduces through the same CME of AtRGS1 also  
542 requires phosphorylation of the same di-serine residues, but not VPS26 for high dose and low  
543 duration sugar exposure (**Figure 7B**). This phenomenon of signaling through AtRGS1 mediated  
544 by the same mechanism of phosphorylation-dependent endocytosis with different G proteins and  
545 adapters raises the important question of how are extracellular ligands discriminated for  
546 downstream signaling events? Although AtRGS1 endocytosis is necessary for G protein activation  
547 it would seem that AtRGS1 is not the discriminator; rather an RLK protein that directly  
548 phosphorylates AtRGS1, AtGPA1 and possibly VPS26, to provide the requisite information for  
549 ligand-specific downstream signal transduction in the cell.

550 The two mechanisms of AtRGS1 endocytosis induced by D-glucose or its metabolites  
551 implies that this signal-dependent pool of AtRGS1 is bipartite, prompting the question of an



552 equilibrium or steady state between the populations. The evidence so far is that it is not. If these  
553 AtRGS1 pools were dynamically exchanging within the membrane, we would expect to induce  
554 internalization of nearly all membrane bound AtRGS1 by inhibiting one mechanism of endocytosis  
555 thereby causing a shift entirely to the other. For example, inhibiting CME with TyrA23 would  
556 force AtRGS1 endocytosis entirely to the SDE mode, however this was not observed. Inhibiting  
557 one mechanism of endocytosis only partly reduced AtRGS1 internalization, approximately by half,  
558 indicating the AtRGS1 populations may be physically isolated and static in the cell membrane  
559 (Figure 7C). Some AtRGS1 proteins may be grouped into so-called microdomains or clusters  
560 surrounded by receptor/co-receptor RLK proteins while other AtRGS1 may be distributed  
561 throughout the membrane without common neighbor RLKs (Figure 7C).

562 Similarly, the question exists whether an equilibrium between the flg22-mediated and D-  
563 glucose-mediated CME pools exists and the conclusion is again that equilibria are not likely,  
564 consistent with a genuine bias in signaling. To clarify, what we define as the “CME pools” here  
565 is the portion of either the flg22- or D-glucose-activated AtRGS1 population that is inhibited by  
566 TyrA23, by loss of the tyrosine binding motif, and by loss of the AP2 $\mu$  subunit of the clathrin  
567 complex (Figure 2). While the two pools share these properties, they do not share the requirement  
568 of the candidate adapter, VPS26 monomer or dimer (Figure 4). Moreover, when the AtRGS1 pool  
569 at the plasma membrane is depleted with D-glucose, there is no effect on the amplitude of flg22  
570 activation (Figure 6).

571 The two mechanisms in the composite glucose-induced AtRGS1 endocytosis may be a  
572 result of two distinct mechanisms of sugar perception: one through direct interaction of AtRGS1  
573 with a sugar or sugar metabolite and the other through sugar binding to a RLK in the membrane  
574 similar to flg22::FLS2 binding (Figure 7D). To compare and contrast these two ligand-biased

575 trajectories, the ordered steps of signal transduction from ligand perception (**step 1**) to  
576 internalization of AtRGS1 (**step 5**) are enumerated in Figure 7D to illustrate mechanistically what  
577 the present work revealed about each origin of endocytosis including phosphorylation (flg22- **step**  
578 **2**/glucose- **step 2**), binding of our candidate adaptor VPS26 (flg22- **step 3**), formation of clathrin  
579 coated vesicles (flg22- **step 4**/glucose- **step 3**), and finally endocytosis of AtRGS1 either via  
580 clathrin coated vesicle (flg22- **step 5** and glucose **step 4**) or sterol dependent rafts (glucose). If  
581 glucose or a metabolite is perceived by two distinct sensing mechanisms, each mechanism may  
582 operate exclusively through one origin of endocytosis with a unique core of G protein and  
583 internalization signaling components. Interestingly, within the glucose model, a system bias may  
584 exist favoring one origin of endocytosis that results from architectural differences in the membrane  
585 surrounding AtRGS1. A high density of glucose-binding RLKs may favor glucose induced CME  
586 of AtRGS1 over the SDE origin.

587         The division of G protein involvement in glucose-induced CME and SDE challenges  
588 previously published reports on the necessity for subunits of the G protein heterotrimer in the full  
589 range of glucose signaling through AtRGS1, specifically shown previously, the complete  
590 abrogation of AtRGS1 endocytosis in the G $\beta$  null mutant and partial reduction of glucose induced  
591 endocytosis with the loss of G $\alpha$  (Urano et al., 2012a). Our results confirm that G $\beta$  is required for  
592 AtRGS1 endocytosis, but only in a low dose scenario, 2% (~110nm). We show no requirement for  
593 G $\beta$  or G $\alpha$  at the higher 6% (~330nm) glucose concentration. It may be that higher sugar  
594 concentrations, those typically found at or around vascular unloading areas, illicit a quicker  
595 signaling response than low dose sugar likely found in or near epidermal cells where we quantified  
596 AtRGS1 internalization. The significance of sugar signaling with regard to cell growth, division,  
597 and maintenance may necessitate multiple dose-dependent mechanisms of signal transduction

598 encoded in different origins of endocytosis and the individual G protein associated components.  
599 An investigation of glucose-induced signaling outputs that originate through one or both  
600 mechanisms of AtRGS1 endocytosis could reveal information on the significance of each  
601 endocytosis origin and if a cell-mediated system bias truly exists.

602 Both flg22- and D-glucose outputs require AtRGS1 (Chen et al., 2003; Grigston et al.,  
603 2008; Liang et al., 2018; Tunc-Ozdemir and Jones, 2017) and an intact heterotrimeric G protein  
604 complex (Figure 3) but as discussed for D-glucose responsiveness depends on both the  
605 concentration and duration of D-glucose. We previously designated this non-threshold-based  
606 activation phenomenon as Dose-Duration Reciprocity (**DDR**) where a low dose of D-glucose for  
607 a long period reaches the same output amplitude as a high dose presented as a pulse (Fu et al.,  
608 2014a). The proposed mechanism is recruitment of WNK8 and WNK1 to the membrane by the  
609 G $\beta\gamma$  dimer AGB1/AGG as a function of DDR to phosphorylate AtRGS1 for endocytosis.  
610 However, our higher resolution analyses here challenge some aspects of that mechanism and  
611 provide deeper mechanistic insight. AGB1 is not required for high-glucose DDR but is essential  
612 for low D-glucose DDR. WNK8 kinase is required as previously shown but WNK1 is shown to  
613 not be required at low-glucose longer duration, 6 hours, DDR in contrast to previously published  
614 data (Fu, et al 2014). This discrepancy is most likely due to differences in expression level between  
615 studies (transient for Fu, et al 2014 and stable here). It has been shown that glucose responsiveness  
616 is sensitive to the pool size of AtRGS1 (Liao et al., 2017).

617 This study focuses on biased signaling launched from different architectures of two  
618 AtRGS1-centered pathways. We show that phosphorylation by different sets of kinases encodes  
619 this bias. However, the work does not address how the architecture is established or maintained  
620 but we speculate that this too is based on a phosphorylation bar code on the AtRGS1/G protein

621 complex. Therefore, establishing the dynamics of both the pre- and post-signaling phosphorylation  
622 bar codes is important for our understanding.

623         Why both cytoplasmic and extracellular glucose pools are monitored by the plant cell  
624 remains unclear. We speculate that the extracellular pool of glucose is far more dynamic than the  
625 cytoplasmic pool due to its rapid metabolic flux in metabolism occurring in the cytoplasm but not  
626 occurring in the apoplast. Therefore, an extracellular glucose detection system is more appropriate  
627 for monitoring sugars produced by photosynthesis in real time. This is consistent with the recent  
628 finding that AtRGS1 is important for detecting fluctuations in CO<sub>2</sub>-fixed sugar over the diel cycle  
629 (Chen et al., 2003; Tunc-Ozdemir et al., 2018).

630         It is conceivable that the biased system here is the crux of the Defense vs. Growth trade-  
631 off problem that plants experience. Specifically, pathogen attack compels the plant to shift its  
632 utilization of fixed sugars from building cell walls to defense molecules (Huot et al., 2014). The  
633 AtRGS1/G protein complex may be the fulcrum for this balance because it is involved in detecting  
634 fixed sugars (Mudgil et al., 2016; Tunc-Ozdemir et al., 2018), establishing cell wall composition  
635 (Delgado-Cerezo et al., 2012; Escudero et al., 2017; Klopffleisch et al., 2011) and serving as a  
636 sentinel in innate immunity (Zhong et al., 2018).

637         In conclusion, our data provide evidence for system biased signaling through AtRGS1 and  
638 introduces a previously unknown arrestin-like adaptor. We introduce the importance of system  
639 architecture as it relates to system bias in G protein complex signaling.

640

641

642 **Materials and Methods**

643 *Plant Growth Conditions*

644 Arabidopsis seeds were surface sterilized with 80% EtOH for 10 seconds while vortexing followed  
645 by a 10-second vortex with 30% bleach. Seeds were subsequently washed 3X with ddH<sub>2</sub>O and  
646 suspended in 12 well cell culture plates with ¼ MS with no sugar at pH 5.7 with 10-12 seeds per  
647 well. Plates were wrapped in aluminum foil and cold-treated at 4°C for 2 days followed by a 2-  
648 hour light treatment to induce germination. After light treatment, plates were again wrapped in  
649 aluminum foil and placed on a horizontal shaker at ambient temperature for 5 days before imaging.

650 *AtRGS1 Internalization Assay*

651 AtRGS1-YFP internalization was induced with D-Glucose and flg22 as described in Urano *et al*  
652 (Urano et al., 2012b), Fu *et al* (Fu et al., 2014b), and Tunc-Ozdemir *et al* (Tunc-Ozdemir et al.,  
653 2016). Briefly, 6% D-glucose or 1µm flg22 were applied to 3-day old seedlings for 30 and 10  
654 minutes respectively before imaging on a Zeiss LSM880 confocal scanning microscope under the  
655 conditions described below. Images were acquired on the hypocotyl epidermis 2-4 mm below the  
656 cotyledons of seedlings treated with water, glucose, and flg22 in addition to the pharmacological  
657 inhibitors outlined below. Seedling exposure to light was minimized as much as is practical while  
658 imaging to avoid light induced internalization of AtRGS1.

659 *Pharmacological Inhibition of RGS Internalization*

660 AtRGS1 internalization was inhibited with TyrA23 and MβCD under the following conditions.  
661 TyrA23 was applied to 3-day old seedlings for a pre-incubation period of 60 minutes at specified  
662 concentrations. Following the pre-incubation period, a combination of TyrA23 and 6% D-Glucose  
663 were applied to the seedlings for 30 minutes immediately followed by image acquisition. In the  
664 case of flg22, TyrA23 and 1µm flg22 were applied to the seedling for 10 minutes following the

665 pre-incubation period. For M $\beta$ CD, the pre-incubation period was 45 minutes at specified  
666 concentrations. When both inhibitors were simultaneously applied, pre-incubation was 60 minutes  
667 at the respective concentrations.

#### 668 *Confocal Imaging and RGS1 quantification*

669 Image acquisition was done with a Zeiss LSM880 (Zeiss Microscopy, Oberkochen, Germany)  
670 confocal laser scanning microscope equipped with AiryScan and GaAsP detection system. YFP  
671 excitation was 514nm and emission collection 525-565nm. For RGS internalization assays a z-  
672 stack series was acquired with 7-10 focal plane images at 0.5 $\mu$ m intervals with a C-Apochromat  
673 40x/1.2NA water immersion objective. Image processing and RGS internalization measurements  
674 were done with the Fiji distribution of ImageJ (Schindelin et al., 2012) as described by Urano *et*  
675 *al* (Urano *et al.*, 2012a) with the following modification: Internalized YFP fluorescence was  
676 measured and subtracted from total YFP fluorescence of individual cells as opposed to total  
677 fluorescence of the hypocotyl image as stated in Urano *et al.* Statistical analysis was performed  
678 using analysis of variance with n=number of cells measured.

#### 679 *TIRF imaging and area/speed measurements of AtRGS1-GFP*

680 Arabidopsis Col-0 seeds containing 35S-RGS1-GFP were grown as mentioned in the plant growth  
681 section. 5-day-old seedlings were transferred to a solution of either 6% D-glucose or 1 $\mu$ m flg22  
682 and imaged at 5, 10, and 15 minutes while immersed in the ligand solution. Imaging was performed  
683 on a Nikon Ti Eclipse with SR Apo TIRF 100x lens (NA 1.5, WD 120 $\mu$ m). GFP excitation  
684 occurred at 488nm and emission collection at 515-555nm with an Andor iXon3 EMCCD camera.  
685 60 second time-lapse imaging was initiated at the beginning of each time point with 200ms  
686 acquisition speed. Time-lapse sequences were normalized for fluorescence over time using  
687 IMARIS (v9.2.2, Bitplane AG, Zurich, Switzerland). The IMARIS Surface feature was used to

688 track and calculate the area and speed of individually identifiable AtRGS1 proteins/clusters  
689 (labeled as tracks in IMARIS) over time. The average speed and area of each unique Track for a  
690 30 second interval between 5:15-5:45 or 15:15-15:45 was calculated using a script in Matlab  
691 (Supplemental code).

#### 692 *Synthesis of [<sup>14</sup>C] isomaltulose*

693 Sucrose isomerase (SI) from *Pantoea dispersa* UQ68J (GenBank AY223549) was cloned into  
694 expression vector pET24b (Novagen) first by PCR of genomic DNA using the following PCR  
695 forward primer 5'-GGA TCC AAC AAT GGC AAC GAA TAT ACA AAA GTC C-3'\_included  
696 a BamH I restriction site and a start codon; reverse primer 5'-ATA GGT ACC TCA GTT CAG  
697 CTT ATA GAT CCC-3'\_included a Kpn I restriction site and a stop codon.

698 Expression was done using *E. coli* BL21(DE3) (Novagen), 37°C, 225 rpm. When optical  
699 density at 600 nm reached 1.00), isopropyl-D-thiogalactopyranoside was added to a final  
700 concentration of 0.5 mM for further induction. The incubation of the culture was continued for  
701 another 3 h at 28°C. Cells were harvested by centrifugation (3,000 ×g, 4°C, 10 min), resuspended  
702 in 50 mM Tris-HCl (pH 8.0)-2 mM EDTA, and then re-centrifuged. The cell pellet was  
703 immediately frozen in liquid nitrogen and stored at -75°C. Cells were suspended in extraction  
704 buffer (20 mM Tris-HCl (pH 7.4), 200 mM NaCl, 1 mM EDTA, 1 mM azide, 10 mM -  
705 mercaptoethanol) and then lysed by sonication (nine 15-s pulses at 50 W with a Branson Sonifier  
706 450 microprobe), centrifuged (10,000 ×g, 4°C, 10 min), and filtered through a 0.45-μm-pore-size  
707 membrane (Gelman Acrodisc). The pET24b vector introduced a carboxy-terminal six-His tag into  
708 expressed proteins, which were purified by adsorption to nitrilotriacetic acid (NTA) agarose  
709 (QIAGEN) and elution with 25 mM NaH<sub>2</sub>PO<sub>4</sub>-150 mM NaCl-125 mM imidazole buffer (pH 8.0)

710 by following the manufacturer's instructions. The purity of SI proteins was verified by SDS-PAGE  
711 as a single band on Coomassie Blue R-250 staining.

712  $[^{14}\text{C}]$  isomaltulose was prepared using 1.48MBq  $[\text{U-}^{14}\text{C}]$ Sucrose (Amersham, UK) in 200  
713  $\mu\text{l}$  water with 3% ethanol (equals to 0.3379 mM) was reacted with 30  $\mu\text{l}$  purified UQ68J SI for at 30  
714  $^{\circ}\text{C}$  60 min. The converted  $[^{14}\text{C}]$  isomaltulose concentration by UQ68J sucrose isomerase was  
715 estimated by three-rep parallel conversions of unlabelled sucrose (S7903, Sigma) in the same  
716 concentration of 0.3379 mM with 3% Ethanol by the same enzyme. BioLC DX600 (Dionex, USA)  
717 determinations showed  $84.0 \pm 0.106\%$  (Mean  $\pm$  SE) was converted into isomaltulose,  $3.5 \pm 0.197\%$   
718 into trehalulose; into the by-products of glucose and fructose were  $4.6 \pm 0.072\%$  and  $7.8 \pm 0.237\%$   
719 respectively; and there was no sucrose left after the reaction was stopped (Figure 1A).

#### 720 *Sugar uptake assay*

721 One-week old seedlings, grown on a filter disc overlaying 1/2X Murashige and Skoog Basal Salts,  
722 0.7% phytoigel 230C, pH 5.8, 8h/d of 100  $\mu\text{mole/m}^2/\text{s}$ , were lifted off the plate and overlaid 6 mL  
723 of water containing approx. 25,000 cpm of  $[^{14}\text{C}]$  sugars as indicated. The specific activity of the  
724 sugars was 12GBq/mmol. At the indicated times, triplicate sets of 10 seedling were gently rinsed  
725 and placed in a 1.7-mL microfuge tube with 1 mL of scintillation fluid (Perkin Elmer Inc) and  
726 radioactivity was quantitated by liquid scintillation counting. CPM from time zero (typically 80-  
727 150 cpm) was subtracted from the average of the 3 samples. The CPM for  $[^{14}\text{C}]$  isomaltulose  
728 uptake into seedlings at each time was corrected for its 84% purity. The experiment as shown was  
729 repeated once with the same result.  $[^{14}\text{C}]$  glucose uptake was repeated 4 times.

#### 730 *G protein activation*

731 Wild type (Col-0) Arabidopsis seeds expressing 35S:AtRGS1-YFP were sterilized and 10-20  
732 seeds were then sown on 1-mL liquid 1/4 X Murashige and Skoog (MS) medium without sucrose



733 in 24-well plates and stratified at 5°C for 2 days, followed by 2 hours light, then grown in darkness  
734 at 27 °C for 4 days. For best results, the plates kept in darkness but moved to the microscope room  
735 on the third day to acclimate. A Zeiss LSM710 confocal laser scanning microscope with a C-  
736 Apochromat 40X 1.2N.A. water immersion objective was used. The YFP fluorescence was excited  
737 by a 514-nm argon laser and the photomultiplier detector was set between 526 nm and 569 nm for  
738 quantification. The proportion of internalized AtRGS1 was analyzed by Image J.

739 *Live cell imaging of MAPK reporter (SOMA) lines*

740 Detached etiolated hypocotyls were prepared for imaging on the confocal microscope using the  
741 HybriWell™ method as previously described (Vang et al., 2018; Zaman et al., 2019). A hypocotyl  
742 from a dark grown 5-day-old seedling was placed on top of the droplet, and a HybriWell™ (Grace  
743 Bio-Labs, <http://gracebio.com/>, cat. no. 611102) was gently placed on the coverslide with the  
744 hypocotyl in the center to form a 150-µm deep imaging chamber with a volume of 30 µl. Ultrapure  
745 water (300 µl) was injected through one of the HybriWell™ ports using a pipettor to fill the 30-µl  
746 chamber with water and to expel any air bubbles. A 200-µl droplet of ultrapure water was then  
747 placed on one of the ports to prevent the chamber from drying out. The HybriWells containing the  
748 mounted hypocotyls were then placed in covered Petri dishes and equilibrated by incubating at  
749 20–23°C under constant light for 6–8 hours prior to imaging.

750 Confocal microscopy was performed using a Zeiss LSM 710 with a C-Apochromat  
751 40x/1.20 water immersion objective lens. Samples were excited at 458 nm with 3% power, and  
752 emission was measured between 463 and 517 nm for Turquoise GL and between 534 and 570 nm  
753 for YPet. Z-stacks were collected every 2 min with an optical slice thickness of 1.2 µm. Chemical  
754 treatments were added to the samples during imaging by pipetting 200 µl of solution containing  
755 the treatment onto one port of the HybriWell. For experiments involving tyrphostin A23 and

756 tyrphostin A51, hypocotyls were pretreated with 50  $\mu$ M of these compounds for 30 min prior to  
757 imaging.

758 Post-processing of the raw image data was performed using Fiji (Schindelin et al., 2012).  
759 The 'Z-projection' function was performed on an image stack using the 'Max Intensity' setting.  
760 The resulting projection was then separated into two images, one for the Turquoise GL emission  
761 channel and one for the YPet emission channel. The 'Subtract Background' function was  
762 performed on both images, with the 'rolling-ball radius' set as the default 50 pixels. A mask was  
763 then created from the YPet channel using the 'Convert to Mask' function. The background  
764 subtracted YPet and Turquoise GL images were then converted into 32-bit images. These 32-bit  
765 images were then multiplied by the Mask file. The resulting YPet image was divided by the  
766 resulting Turquoise GL image using the 'Image Calculator' function to create a ratio image  
767 representing the ratio of YPet to Turquoise emission. Finally, the 'Threshold' function was  
768 performed using the default values, with the 'NaN background' option enabled. The 'Fire' lookup  
769 table was then applied to the final ratio image. To measure the ratio of YPet to Turquoise GL  
770 emission, a region of interest (ROI) was selected within the ratio image using Fiji and the average  
771 ratio value within that ROI was then measured.

#### 772 *Live cell Ca<sup>++</sup> imaging with R-GECO1*

773 5-day-old etiolated hypocotyls expressing R-GECO1 calcium reporter were grown in aqueous  
774 media containing ¼ MS. Hypocotyls were excised and mounted in HybriWells 6-8 hours prior to  
775 imaging with a Zeiss LSM710 confocal laser scanning microscope equipped with a C-Apochromat  
776 40×/1.20 water immersion objective. R-GECO1 was excited using 561 nm laser with 7.0 % laser  
777 power, and emission was measured between 620 and 650 nm. Z-stacks were collected 2 min after  
778 chemical treatment with an optical slice thickness of 1.5  $\mu$ m. Chemical treatments were added to

779 the samples during imaging by pipetting 200  $\mu$ l of solution containing the treatment onto one port  
780 of the HybriWell. The digital images were analyzed with Fiji (Schindelin et al., 2012).

### 781 *Modeling AtVPS26*

782 Five models (atvps26a1-5) were created by the MODELLER using the automodel script based on  
783 the human VPS26A template 2FAU. For evaluation and selection of the "best" model, we  
784 calculated the objective function (molpdf), Discrete Optimized Protein Energy (**DOPE**) score,  
785 GA341 assessment score and root mean square deviation (**RMSD**) between the model and the  
786 template. The best model has the lowest value of the molpdf and overall DOPE assessment scores.  
787 In addition, DOPE scores were calculated per-residue and the template and the five atvps26a  
788 models were compared using GNUPLOT (**Figure S4C**) and found to be dissimilar in only three  
789 positions (residue around 60, 240, and 260). The atvps26a2 model was selected based on the  
790 lowest, RMSD value (**Figure S4D**) and plotted DOPE per-residue score curve (**Fig. S4E**). With an  
791 RMSD of 0.17 Å, atvps26a-2 differs from the template by less than the length of a C-C bond.

### 792 **SUPPLEMENTAL INFORMATION**

793 Supplemental Information includes 6 figures and 1 text file.

### 794 **ACKNOWLEDGEMENTS**

795 We would like to thank Dr. N Phan for creating the AtRGS1<sup>Y112A</sup> plasmid and transgenic lines and  
796 for experiments testing the involvement of adaptors in AtRGS1 endocytosis and data in Figure 1A  
797 and B. We thank Dr. V Gurevich for helpful comments and Dr. K Ghusinga for assistance with  
798 writing MatLab code. We thank Dr. J Huang for help in the turanose experiment. This work was  
799 supported by grants from the NIGMS (GM065989) and NSF (MCB-1713880) to A.M.J. The  
800 Division of Chemical Sciences, Geosciences, and Biosciences, Office of Basic Energy Sciences  
801 of the US Department of Energy through the grant DE-FG02-05er15671 to A.M.J. funded the

802 biochemical aspects of this project. The content is solely the responsibility of the authors and does  
803 not necessarily represent the official views of the National Institutes of Health.

#### 804 **AUTHOR CONTRIBUTIONS**

805 T.J.R-E., J.W., X.S., B.D., H.J., M.T-O, and F.L. performed experiments and produced figures.  
806 T.J.R-E., J.W., X.S., and A.M.J. designed experiments, and analyzed results. P.K provided the  
807 MAPK reporters prior to its publication and guided those experiments. L.W. synthesized and  
808 purified [<sup>14</sup>C]isomaltulose. Y.T. performed sugar uptake experiments shown in Figure 1. T.J.R-  
809 E., J.W., and A.M.J wrote the paper.

#### 810 **DECLARATION OF INTERESTS**

811 The authors declare no competing interest.

812

813

814

815 **Figure legends**

816  
817 **Figure 1. AtRGS1 perceives extracellular glucose or glucose metabolite.** flg22 is perceived  
818 extracellularly but an extracellular site of glucose perception for activation of G signaling in  
819 Arabidopsis has not yet been made with an impermeant glucose analog. See supporting data for  
820 this figure in Supplemental Material Figure S1. **A.** Isomaltulose and D-glucose induce rapid  
821 AtRGS1-YFP endocytosis in a dose-dependent manner. Images are representative from hypocotyl  
822 epidermal cells ectopically expressing AtRGS1 tagged with YFP. **B.** Despite being much less  
823 permeant to the Arabidopsis plasma membrane, isomaltulose is slightly more potent than D-  
824 glucose in activation of G signaling as measured by proxy using AtRGS1-YFP endocytosis (Fu et  
825 al., 2014a). **C.** Turanose is impermeant to plant cells (Rolland et al., 2002) yet is as effective as  
826 D-glucose in inducing AtRGS1-YFP endocytosis. **D.** Structures. Both isomaltulose and turanose  
827 share a glucose ring moiety.

828  
829 **Figure 2. Two origins of AtRGS1 endocytosis.** Pharmacological inhibitors show two origins of  
830 AtRGS1-YFP endocytosis. **(A)** AtRGS1-YFP seedlings were treated with increasing  
831 concentrations of M $\beta$ CD at 0mM (n=10), 1mM (n=7), 2mM (n=8), 5mM (8), and 10mM (n=11)  
832 for 45 min followed by incubation in the same solution but supplemented with 1  $\mu$ M flg22 for 10  
833 min or **(B)** 6% D-glucose for 30 min before imaging epidermal cells. Internalized AtRGS1-YFP  
834 was quantified to determine total endocytosis of AtRGS1. M $\beta$ CD does not inhibit flg22-induced  
835 AtRGS1 endocytosis, but does partially inhibit glucose-induced AtRGS1 endocytosis at 5mM and  
836 above (p<0.01). **(C)** TyrphostinA23, an inhibitor of CME, significantly impairs flg22-induced  
837 AtRGS1 endocytosis and **(D)** partially inhibits glucose-mediated AtRGS1 endocytosis (p<0.01).  
838 The structurally similar, but inactive analog of TyrA23, TyrA51, has no effect indicating the effect

839 of TyrA23 is specific. **(E)** When both inhibitors are applied with glucose, AtRGS1 internalization  
840 is reduced to basal levels ( $p < 0.01$ ). A genetics approach to inhibit AtRGS1 internalization confirms  
841 pharmacological results. **(F)** A genetic null mutant of *ap2 $\mu$* , the cargo recognition complex for  
842 CME, results in complete inhibition of flg22-induced AtRGS1 down to basal levels, confirming  
843 TyrA23 results. **(G)** Glucose-induced internalization of AtRGS1 is partially inhibited in the *ap2m*  
844 mutant, but further reduced to basal levels with the addition of M $\beta$ CD ( $p < 0.01$ ). **(H)** Mutation of  
845 Y<sup>112</sup> to Alanine in the AtRGS1 tyrosine motif recognized by *ap2 $\mu$* , AtRGS1<sup>Y112A</sup>, inhibits flg22-  
846 induced AtRGS1 endocytosis to basal levels. **(I)** Glucose-mediated AtRGS1 endocytosis is  
847 partially inhibited in AtRGS1<sup>Y112A</sup>, but subsequently reduced to basal levels with the addition of  
848 M $\beta$ CD ( $p < 0.01$ ). Quantification of AtRGS1-YFP fluorescence is discussed in methods. **(J)** The  
849 speed and surface area of AtRGS1-GFP particles as tracked and measured by IMARIS from 30  
850 second time lapse imaging using TIRF at 5 minutes after treatment with glucose and flg22.  
851 Identifiable AtRGS1-GFP particles are significantly smaller in the flg22 treated population  
852 compared to glucose. No significant difference in speed is observed between particles in the two  
853 treatments. **(K-P)** Endocytosis markers CLC-mCherry and FLOT1-mCherry localize to the cell  
854 periphery and increase overlap with RGS1-GFP in a ligand dependent manner after treatment with  
855 flg22 and glucose. Zeiss confocal micrographs show AtRGS1-GFP (**green channel**) and either  
856 CLC-mCherry (**red channel K-M**) or FLOT1-mCherry (**red channel N-P**) after 5 minute  
857 treatments with water (**K and N**), flg22 (**L and O**), and glucose (**M and P**). After water treatment,  
858 CLC-mCherry (**K box inset**) and FLOT1-mCherry (**N box inset**) remain distributed throughout  
859 the cell cytoplasm and highly overlapped AtRGS1-GFP particles (**Q**). After treatment with flg22,  
860 CLC-mCherry migrates to the cell periphery with an observed increase in protein agglomeration  
861 (**L red arrows**) and decrease overlap score with RGS1GFP (**S**), while FLOT1-mCherry has no

862 observable change compared to water (**G box inset and R**). Upon treatment with glucose, FLOT1-  
863 mCherry protein bodies congregate at the cell periphery (**P red arrows**) and decrease overlap with  
864 RGS1-GFP (**V**), while CLC-mCherry remains unchanged compared to water (**M box inset and**  
865 **U**). (**W**) The average overlap scores for CLC-mCherry and FLOT1-mCherry after addition of  
866 water, flg22, and glucose. flg22 addition induces a significant change in CLC compared to glucose  
867 and water while glucose induces a significant change with FLOT1 compared to flg22 and water  
868  $p < 0.01$ .

869

870 **Figure 3. CME of AtRGS1 is phosphorylation dependent and G protein monomer specific.**

871 Known phosphorylation sites at serine residues on the C-terminal end of AtRGS1 are required for  
872 both flg22 and glucose-induced CME of AtRGS1. (**A**) A truncated AtRGS1, AtRGS1<sup>ΔCt</sup>, lacking  
873 the 43 most C-terminal residues, including 8 serines, resulted in basal levels of flg22-induced  
874 AtRGS1 internalization. (**B**) Glucose-induced AtRGS1 internalization is partially reduced in  
875 AtRGS1<sup>ΔCt</sup>, but further reduced to basal levels with the addition of MβCD. (**C and D**) Mutation  
876 of three specific serine residues to alanine at 428, 435, and 436, in a full length AtRGS1,  
877 AtRGS1<sup>3SA</sup>, yielded similar results to AtRGS1<sup>ΔCt</sup> for flg22 and glucose-mediated internalization,  
878 but indicate phosphorylation of one or several specific serine residues is necessary for CME of  
879 AtRGS1. flg22 and glucose require known kinases for AtRGS1 internalization. (**E**) Genetic  
880 ablation of the flg22 receptor FLS2 yields basal levels of flg22-induced AtRGS1 internalization,  
881 but does not affect glucose-induced AtRGS1 internalization. (**F**) Similarly, null mutation the  
882 BAK1 co-receptor, *bak1-4*, results in ablated flg22-induced AtRGS1 internalization, but not for  
883 glucose. (**G**) The high dose and low duration glucose specific WNK8 kinase is necessary for  
884 glucose induced AtRGS1 internalization, but not flg22. Individual G proteins are necessary for

885 AtRGS1 endocytosis in a ligand specific manner. **(H)** A genetic null mutant of *Gα*, *gpa1-4*, limits  
886 flg22-induced endocytosis of AtRGS1 to basal levels, while glucose-induced endocytosis is  
887 unaffected compared to wild-type. **(I)** A null mutation of XLG2, *xlg2-1*, an extra-large *Gα* protein,  
888 also results in reduced flg22-induced AtRGS1 endocytosis to basal levels, but has no significant  
889 effect on glucose-mediated endocytosis compared to wild type. **(J)** A null mutation of the  
890 AGB1/AGG1 heterodimer, *agb1-2/agg1*, inhibited flg22-induced AtRGS1 endocytosis, but had  
891 no affect on high does, low duration glucose-induced AtRGS1 endocytosis. **(K)** At low does, long  
892 duration AGB1/AGG1 are necessary for glucose induced internalization. Quantification of  
893 AtRGS1-YFP fluorescence is discussed in methods.

894

895

896 **Figure 4. Arabidopsis VPS26 subunits of the retromer complex may moonlight as  $\beta$ -arrestin-**  
897 **like adaptors for AtRGS1 internalization.** **(A)** 3-D alignment of the ATVPS26A model  
898 (colored cyan) with the bovine  $\beta$ -arrestin-3 (PDB 3P2D, (colored wheat). The structure of  
899 AtVPS26A model shows a similar arrestin scaffold with  $\beta$  arrestin which contains a semi  
900 symmetric fold of two  $\beta$  strand sandwich structures in the N domain and C domains linked by the  
901 central loops (ii); each sandwich is formed by 3 or 4  $\beta$  sheets, respectively. **(B)**. Differences  
902 between ATVPS24A model and bovine  $\beta$ -arrestin-3. AtVPS26A lacks a short  $\alpha$ -helix (i) inside  
903 the arrestin N-terminal domain which has been implicated in receptor binding.  $\beta$  arrestin contains  
904 a longer C terminal tail which extend all the way to bind the N terminal domain that is important  
905 for linkage towards the clathrin-mediated endocytosis (CME) in animals. The C terminus of  
906 AtVPS26A has no extension and ends closely to the C domain. **(C)**. The central crest. The central  
907 crest of *atvps26a* is similar with that of  $\beta$  arrestin which includes the finger loop, middle loop and



908 the C loop. While  $\beta$  arrestin has a longer finger loop which is important for the receptor binding.  
909 D,E The polar core of bovine  $\beta$  arrestin-3. The residues in the polar core of bovine  $\beta$  arrestin-3  
910 are Asp<sub>27</sub>, Arg<sub>170</sub>, Asp<sub>291</sub>, Asp<sub>298</sub> and Asp<sub>393</sub> which are shown as vacuum electrostatics (D) and  
911 sticks relatively (E). F,G. The polar core of atvps26A. The residues of atvps26a are the N domain  
912 residues Glu<sub>118</sub> and Tyr<sub>120</sub>, and C domain residues Arg<sub>213</sub>, Glu<sub>215</sub>, Thr<sub>258</sub>, Tyr<sub>272</sub>, and Arg<sub>296</sub> which  
913 are also shown as vacuum electrostatics (F) and sticks (G). Although different amino acid  
914 composition, both cores consist similarly-positioned positive charged residues and allow the  
915 formation of hydrogen bonds under physiological conditions. However, the orientation and shape  
916 of the polar core of VPS26 is distinct with  $\beta$  arrestin. The arrestin polar core is embedded between  
917  $\beta$  sheets in the N terminal domain whereas the VPS26 core is open and elongated, spanning the  
918 length of space between the N domain and C domain.

919  
920 **Figure 5. Physical interaction between AtRGS1 and VPS26.** (A) Bifluorescence  
921 complementation (BiFC) of VPS26A and VPS26B showing a specific head-to-tail orientation  
922 requirement. Representative cells shown. N=5. Experiment repeated 2 times. (B) Split luciferase  
923 complementation by VPS26A and VPS26B heterodimers and VPS26B homodimers. Error bars  
924 are standard error of the mean (SEM). Means with different letters indicate significantly different  
925 (Tukey's HSD test,  $p < 0.05$ ). N=64 leaf discs from 4 individual tobacco plants. (C) BiFC of VPS26  
926 A and VPS26B with AtRGS1 in a specific orientation. (D) Split luciferase complementation by  
927 VPS26A and AtRGS1. Positive control is complementation by the heterotrimeric G protein  
928 complex (GPA1/AGB1/AGG1). Negative control is AtGPA1 and AGB1 in the absence of AGG1.  
929 Error bars are SEM. N=64. ( $p < 0.05$ ). (E) Yeast two-hybrid complementation between The  
930 cytoplasmic domain of AtRGS1 (RGS1-J5) and VPS26B. RGS1-J5 contains the linker between

931 the 7TM domain and the RGS box, the RGS box and a C-terminal tail (CT). RGS1-  $\Delta$ CT lacks the  
932 C-terminal tail which contains the phosphorylation cluster required for AtRGS1 endocytosis.  
933 RGS1-  $\Delta$ CTS<sub>405,406A</sub> lacks the CT and has two additional phosphosites mutated. -LW is  
934 leucine/tryptophan dropout, -LWH is leucine/tryptophan/histidine drop out media; 10 mM 3-AT  
935 indicates higher stringency by the addition of 10 mM 3-amino-1,2,4-triazole.

936

937 **Figure 6. MAPK activation and Ca<sup>2+</sup> signaling in response to flg22 and D-glucose. (A-D)**

938 Processed confocal images of the epidermis of etiolated hypocotyls from the SOMA-NLS (A, B)  
939 and SOMA-NES (C, D) transgenic lines depicting the ratio of YPet to Turquoise GL emission  
940 produced by exciting Turquoise GL. Scale bar represents 100  $\mu$ m. Time stamps indicate when the  
941 image was collected in minutes:seconds. Images at 00:00 were collected before treatment, while  
942 those at time point 20:00 were collected 5 minutes after treatment with 1  $\mu$ M flg22. White rectangle  
943 represent regions of interest (ROIs) used to measure YPet and Turquoise GL emission. (E-H). The  
944 ratio of YPet to Turquoise GL emission produced by exciting Turquoise GL over time was  
945 determined using the ROIs shown in (A-D). During the first 10 minutes of each experiment the  
946 samples are incubated in pure water. The arrow indicates the time at which 1  $\mu$ M flg22 (E, G) or  
947 6% D-glucose (F, H) was added to the sample. (E) SOMA-NES lines pretreated with water  
948 (orange) or 50  $\mu$ M TyrA23 (yellow) prior to imaging. Inset graph (F) shows SOMA-NES line  
949 pretreated with 6% D-glucose for 30 minutes prior to imaging. (I) flg22 dose-response in SOMA-  
950 NES lines. flg22 was added after two minutes of imaging. (J, K) R-GECO1 lines treated with  
951 flg22 or D-glucose in Col-0 (J) or *rgs1-2* (K) backgrounds. Fluorescence intensity changes of R-  
952 GECO1 in ~20 regions of interests in wild type plants. Fractional fluorescence changes ( $\Delta F/F$ ) for  
953 R-GECO1 were calculated from background corrected intensity values of R-GECO1 as (F -

954  $F_0)/F_0$ , where  $F_0$  represents the average fluorescence intensity of the baseline of a measurement  
955 of each genotype. Error bars are standard deviations. Asterisks represent statistical significance ( $P$   
956  $< 0.01$ ) between treatment and water as determined by 2-way ANOVA.

957

958 **Figure 7. Component overview of flg22 and glucose bias signaling.** (A) Simple model  
959 illustrating flg22 and glucose or metabolite input and the respective bias signaling output through  
960 AtRGS1, as well as a chart summary detailing the origins of endocytosis (CME and SDE),  
961 recognition motif and phosphorylation requirements, and individual proteins necessary for  
962 glucose- and flg22-induced endocytosis of AtRGS1. (B) Membrane overview illustrating proposed  
963 AtRGS1 microdomain clusters with common RLK neighbors. flg22 (orange circle) binds to FLS2  
964 to initiate signaling through AtRGS1. The mechanism of glucose (blue circle) perception is  
965 unknown as indicated by the question marks. After ligand perception, SDE or CME of AtRGS1  
966 occurs to permit downstream signaling. (C) A diagram of the individual components involved in  
967 the mechanism of endocytosis initiated by flg22 and glucose or metabolite. Numbers indicate the  
968 order of operations. For flg22: (1) perception of ligand, (2) phosphorylation of AtRGS1 by a RLK,  
969 (3 and 4) binding of clathrin complex and/or VPS26 in an unknown order, and (5) internalization  
970 of AtRGS1. For glucose or metabolite: (1) ligand perception by a RLK or direct interaction with  
971 AtRGS1, (2) receptor interaction with WNK kinase (In the case of SDE 2 indicates immediate  
972 endocytosis as other key components of the pathway are currently unknown), (3) phosphorylation  
973 of AtRGS1 by WNK kinases, (4) binding of clathrin complex to AtRGS1, and (5) internalization  
974 of AtRGS1. TyrA23 is shown inhibiting CME in both pathways, while M $\beta$ CD is shown inhibiting  
975 AtRGS1 microdomain formation at the membrane.

976

977

## Supplemental Information

978

979

980 **Supplemental Figure S1. Isomaltulose is nearly impermeant in Arabidopsis.** **A.** To test the  
981 permeability of Arabidopsis seedlings to isomaltulose, [<sup>14</sup>C] isomaltulose was synthesized and  
982 purified to 84% as described in the STAR\* methods. Sugar analysis is as described and the results  
983 shown. **B.** Uptake of [<sup>14</sup>C] D-glucose and [<sup>14</sup>C] isomaltulose into Arabidopsis seedlings was tested.  
984 AU, Arbitrary Units as described.

985

986 **Supplemental Figure S2. Tracking AtRGS1 after ligand addition.** **(A-E)** IMARIS surface  
987 tracking showing **(A)** the original wide-field image acquired by TIRF, **(B)** the tracked spots  
988 imposed on the original image and tracked at **(C)** 15s, **(D)** 30s, and **(F)** 60s after initiating time-  
989 lapse imaging. **(F-H)** Tracking results showing the **(F)** average speed and area for AtRGS1-GFP  
990 particles after addition of **(x)** flg22 and **(o)** glucose at 15 minutes post ligand addition. **(G)** area  
991 and **(H)** speed of AtRGS1-GFP particles are broken out into proportion of total tracked particles  
992 at 15 minutes post ligand addition. **(I-T)** Original field of view confocal micrographs highlighting  
993 areas used to calculate Manders Overlap Coefficients from Figure 2K-P (white and yellow boxes)  
994 with the addition of 15 minute post ligand addition images.

995

996 **Supplemental Figure S3. G protein involvement in low dose, long duration sugar signaling**  
997 **(A)** 2% glucose addition for 6 hours to the genetic null mutant *wnk1-1* shows no discernable  
998 difference in AtRGS1 internalization compared to wild type. **(B)** XLG2 is not necessary for  
999 AtRGS1 internalization with low-glucose DDR.

1000

1001 **Figure S4. Supplemental data used to create the VPS26 model and comparison with arrestin**

1002 **structure described in main figure 4. (A)** Homogeneous sequence alignment of VPS26 family

1003 (Arabidopsis VPS26a, VPS26b, VPS26like and Human VPS26A, VPS26B) with arrestin family

1004 (Human arrestin-1, arrestin-2 and bovine arrestin-1, arrestin-2, arrestin-3, squid arrestin-1, shrimp

1005 arrestin-1). **(B)** The identity matrix between arrestin family and VPS26 family. Clustal

1006 Omega(<https://www.ebi.ac.uk/Tools/msa/clustalo/>) was used to generate the Multiple Sequence

1007 Alignment file and the identity matrix result. Then the ESPript 3.0 (Easy Sequencing in PostScript)

1008 which is a program which renders sequence similarities and secondary structure information from

1009 aligned sequences for analysis and publication purpose is used to generate the final alignment

1010 file(<http://esprict.ibcp.fr/ESPript/ESPript/index.php>). A percentage of equivalent residues is

1011 calculated per columns, considering physico-chemical properties. A global score is calculated for

1012 all sequences by extracting all possible pairs of residues per columns, for the score greater than

1013 similarity GlobalScore (0.7), it will be rendered as coloured characters (red characters on a white

1014 background and white characters on a red background if residues are strictly conserved in the

1015 column) with blue frames. From the alignment results, AtVPS26a a high sequence identity of

1016 91.06% with AtVPS26b and a 56.48% sequence identity with human VPS26A (shown in red box

1017 in figure B). AtVPS26a and arrestin family have around 14-20% sequence identity (shown in red

1018 box in the figure). There are conserved residues exist between vps26 family and arrestin family

1019 although low sequence identity between them.(1. DpArr1, squid arrestin-1; 2. p44, bovine arrestin-

1020 1 splice variant; 3. BtArr3, Bovine Arrestin-3; 4. PmArr1, shrimp arrestin-1; 5. BtArr1, Bovine

1021 Arrestin-1; 6. HsArr1, Human Arrestin-1; 7. BtArr2, Bovine Arrestin-2; 8. HsArr2, Human

1022 Arrestin-2; 9. AtVPS26like, Arabidopsis VPS26like; 10. AtVPS26A, Arabidopsis VPS26A; 11.

1023 AtVPS26B, Arabidopsis VPS26B; 12. HsVPS26A, human VPS26A; 13. BtVPS26A, bovine  
1024 VPS26A; 14. HsVPS26B, human VPS26B; 15. BtVPS26B, bovine VPS26B.) (C) Model  
1025 evaluation results of of the 5 models of AtVPS26A. The MODELLER objective function  
1026 (molpdf), DOPE assessment scores (Discrete Optimized Protein Energy, which is a statistical  
1027 potential used to assess homology models in protein structure prediction), GA341 assessment score  
1028 (range from 0.0 (worst) to 1.0 (native-like)) and RMSD (root-mean-square deviation, Å) with the  
1029 template were calculated to evaluate the models. The "best" model is selected with the lowest value  
1030 of the molpdf, DOPE score and RMSD value. The second model (atvps26a-2) was selected given  
1031 better DOPE score and RMSD value. (D) DOPE per residue score files of the 5 atvps26a models  
1032 and the template. DOPE per residue score files of the 5 atvps26a models and the template human  
1033 VPS26A[2FAU] were plotted using GNUPLOT which is a portable command-line driven  
1034 graphing utility( <http://www.gnuplot.info/> ).Upper panel is the curves of the 5 atvps26a models  
1035 and the template. The lower panel is the curve of the “best” model atvps26a-2 with the template.  
1036 (E) 3D structural alignment between AtVPS26A model with human VPS26a template (PDB  
1037 [2FAU]). Atvps26a-2 model colored in pale-cyan and human VPS26A template colored in bright-  
1038 orange using pymol. Upper panel: Side view. Lower panel: Top view. (F) Etiolated hypocotyls of  
1039 Col-0 and VPS26 null mutants at 5 days old. Seedlings were germinated and grown in liquid MS  
1040 for 5 days and transferred to solid agar plates for imaging. Scale bar 5mm.

1041  
1042 **Supplemental Figure S5. Positive and negative controls for SOMA markers.** (A-D) (A)  
1043 Transgenic lines SOMA-NLS (Nuclear MAPK reporter) and (B) SOMA-NES (cytoplasmic  
1044 MAPK reporter) were analyzed before and after treatment with 150 mM NaCl as a positive control  
1045 and with water (C and D) as the negative control. (E,F) Negative control reporters: Mutants of

1046 the transgenic lines SOMA<sup>T679A</sup>-NLS (**E**) and SOMA<sup>T679A</sup>-NES (**F**) were treated with 1  $\mu$ M flg22.  
1047 (**G - O**) Replicate experimental tracings showing reproducibility of TyrA23 inhibition of the flg22-  
1048 induced activation of G signaling via AtRGS1-YFP internalization (**G - N**) and its corresponding  
1049 TyrA51 negative control (**O - V**). During the first 10 minutes of each experiment, SOMA-NES  
1050 lines pretreated with 50  $\mu$ M TyrA23 for 10 min (**G - N**) or 50  $\mu$ M TyrA51 (**O - V**) for 30 minutes  
1051 prior to activation with flg22. Each graph represents 1 individual hypocotyl and each trace is a  
1052 region of interest. (**W**) SOMA-NES was pretreated with 6% D-glucose for 30 minutes prior to  
1053 analysis. Hypocotyls were then treated with 1  $\mu$ M flg22.

1054  
1055 **Supplemental Figure S6. Positive and negative controls and dose response.** Transgenic lines  
1056 SOMA-NLS and SOMA-NES were analyzed before and after treatment with 150 mM NaCl as a  
1057 positive control (**A, B**) and water (**C, D**). (**E, F**) Mutants of the transgenic lines SOMA<sup>T679A</sup>-NLS  
1058 and SOMA<sup>T679A</sup>-NES were treated with 1  $\mu$ M flg22 during the first 10 minutes of each experiment  
1059 the samples. SOMA-NES lines were pretreated with 50  $\mu$ M TyrA23 (**G-N**) or 50  $\mu$ M TyrA51 (**O-**  
1060 **V**) for 30 minutes prior to imaging. (**W-AB**) flg22 dose-response in SOMA-NES lines. (**AC-AH**)  
1061 flg22 dose-response in R-GECO1 lines. Each graph represents 1 individual hypocotyl.

1062  
1063 **Supplemental Code. MatLab code for averaging unique tracked AtRGS1 particle speed and**  
1064 **area.** Speed and area data from IMARIS is exported in xls format and imported to MatLab for  
1065 sorting. Each AtRGS1 tracked protein or cluster has a unique trackID that is sorted while  
1066 maintaining association with speed and area at defined time points. We identified the start and end  
1067 location for each unique trackID and created a matrix to store the data and subsequently find the  
1068 mean for speed and area within our defined time points.

1069

1070



1071 **REFERENCES**

- 1072
- 1073 Adam, T., Bouhidel, K., Der, C., Robert, F., Najid, A., Simon-Plas, F., and Leborgne-Castel, N.  
1074 (2012). Constitutive expression of clathrin hub hinders elicitor-induced clathrin-mediated  
1075 endocytosis and defense gene expression in plant cells. *FEBS Letters* 586, 3293-3298.  
1076
- 1077 Allen, J.A., Yost, J.M., Setola, V., Chen, X., Sassano, M.F., Chen, M., Peterson, S., Yadav, P.N.,  
1078 Huang, X.-p., Feng, B., *et al.* (2011). Discovery of  $\beta$ -arrestin-biased dopamine D<sub>2</sub> ligands for  
1079 probing signal transduction pathways essential for antipsychotic efficacy. *Proceedings of the*  
1080 *National Academy of Sciences* 108, 18488-18493.  
1081
- 1082 Asai, T., Tena, G., Plotnikova, J., Willmann, M.R., Chiu, W.-L., Gomez-Gomez, L., Boller, T.,  
1083 Ausubel, F.M., and Sheen, J. (2002). MAP kinase signalling cascade in Arabidopsis innate  
1084 immunity. *Nature* 415, 977-983.  
1085
- 1086 Banbury, D.N., Oakley, J.D., Sessions, R.B., and Banting, G. (2003). Tyrphostin A23 inhibits  
1087 internalization of the transferrin Receptor by perturbing the interaction between tyrosine motifs  
1088 and the medium chain subunit of the AP-2 adaptor complex. *J Biol Chem* 278, 12022-12028.  
1089
- 1090 Bandyopadhyay, A., Van Eps, N., Eger, B.T., Rauscher, S., Yedidi, R.S., Moroni, T., West, G.M.,  
1091 Robinson, K.A., Griffin, P.R., Mitchell, J., *et al.* (2018). A novel polar core and weakly fixed C-  
1092 tail in squid arrestin provide new insight into interaction with rhodopsin. *Journal of Molecular*  
1093 *Biology* 430, 4102-4118.  
1094
- 1095 Bashline, L., Li, S., Anderson, C.T., Lei, L., and Gu, Y. (2013). The endocytosis of cellulose  
1096 synthase in Arabidopsis is dependent on  $\mu$ 2, a clathrin-mediated endocytosis adaptin. *Plant*  
1097 *physiology* 163, 150-160.  
1098
- 1099 Benovic, J., Kuhn, H., Weyand, I., Codina, J., Caron, M., and Lefkowitz, R. (1987). Functional  
1100 desensitization of the isolated beta-adrenergic receptor by the beta-adrenergic receptor kinase:  
1101 potential role of an analog of the retinal protein arrestin (48-kDa protein). *Proceedings of the*  
1102 *National Academy of Sciences of the United States of America* 84, 8879 - 8882.  
1103
- 1104 Benovic, J.L., Strasser, R.H., Caron, M.G., and Lefkowitz, R.J. (1986). Beta-adrenergic receptor  
1105 kinase: identification of a novel protein kinase that phosphorylates the agonist-occupied form of  
1106 the receptor. *Proceedings of the National Academy of Sciences* 83, 2797-2801.  
1107
- 1108 Bohn, L.M., Gainetdinov, R.R., Lin, F.-T., Lefkowitz, R.J., and Caron, M.G. (2000).  $\mu$ -Opioid  
1109 receptor desensitization by  $\beta$ -arrestin-2 determines morphine tolerance but not dependence. *Nature*  
1110 408, 720-723.  
1111
- 1112 Börnke, F., Hajirezaei, M., Heineke, D., Melzer, M., Herbers, K., and Sonnewald, U. (2002 ).  
1113 High-level production of the non-cariogenic sucrose isomer palatinose in transgenic tobacco plants  
1114 strongly impairs development. *Planta* 214, 356-364.  
1115

- 1116 Boucrot, E., Saffarian, S., Zhang, R., and Kirchhausen, T. (2010 ). Roles of AP-2 in clathrin-  
1117 mediated endocytosis. *PLoS One* 5, e10597.
- 1118
- 1119 Butcher, A.J., Prihandoko, R., Kong, K.C., McWilliams, P., Edwards, J.M., Bottrill, A., Mistry,  
1120 S., and Tobin, A.B. (2011). Differential G-protein-coupled receptor phosphorylation provides  
1121 evidence for a signaling bar code. *Journal of Biological Chemistry* 286, 11506-11518.
- 1122
- 1123 Charest, P.G., Oligny-Longpré, G., Bonin, H., Azzi, M., and Bouvier, M. (2007). The V2  
1124 vasopressin receptor stimulates ERK1/2 activity independently of heterotrimeric G protein  
1125 signalling. *Cellular Signalling* 19, 32-41.
- 1126
- 1127 Chen, J.-G., Willard, F.S., Huang, J., Liang, J., Chasse, S.A., Jones, A.M., and Siderovski, D.P.  
1128 (2003). A seven-transmembrane RGS protein that modulates plant cell proliferation. *Science* 301,  
1129 1728-1731.
- 1130
- 1131 Chen, L.-Q., Hou, B.-H., Lalonde, S., Takanaga, H., Hartung, M.L., Qu, X.-Q., Guo, W.-J., Kim,  
1132 J.-G., Underwood, W., Chaudhuri, B., *et al.* (2010). Sugar transporters for intercellular exchange  
1133 and nutrition of pathogens. *Nature* 468, 527.
- 1134
- 1135 Chen, Q., Iverson, T.M., and Gurevich, V.V. (2018). Structural basis of arrestin-dependent signal  
1136 transduction. *Trends in Biochemical Sciences* 43, 412-423.
- 1137
- 1138 Chen, Q., Zhuo, Y., Kim, M., Hanson, S.M., Francis, D.J., Vishnivetskiy, S.A., Altenbach, C.,  
1139 Klug, C.S., Hubbell, W.L., and Gurevich, V.V. (2014). Self-association of arrestin family  
1140 members. In *Arrestins - Pharmacology and Therapeutic Potential*, V.V. Gurevich, ed. (Berlin,  
1141 Heidelberg, Springer Berlin Heidelberg), pp. 205-223.
- 1142
- 1143 Chinchilla, D., Bauer, Z., Regenass, M., Boller, T., and Felix, G. (2006). The *Arabidopsis* receptor  
1144 kinase FLS2 binds flg22 and determines the specificity of flagellin perception. *The Plant Cell* 18,  
1145 465-476.
- 1146
- 1147 Collins, B.M., McCoy, A.J., Kent, H.M., Evans, P.R., and Owen, D.J. (2002). Molecular  
1148 architecture and functional model of the endocytic AP2 complex. *Cell* 109, 523-535.
- 1149
- 1150 DeFea, K.A., Zalevsky, J., Thoma, M.S., Déry, O., Mullins, R.D., and Bunnnett, N.W. (2000).  $\beta$ -  
1151 Arrestin-dependent endocytosis of proteinase-activated receptor 2 is required for intracellular  
1152 targeting of activated Erk1/2. *The Journal of Cell Biology* 148, 1267-1282.
- 1153
- 1154 Delgado-Cerezo, M., Sánchez-Rodríguez, C., Escudero, V., Miedes, E., Fernández, P.V., Jordá,  
1155 L., Hernández-Blanco, C., Sánchez-Vallet, A., Bednarek, P., Schulze-Lefert, P., *et al.* (2012).  
1156 *Arabidopsis* heterotrimeric G-protein regulates cell wall defense and resistance to necrotrophic  
1157 fungi. *Molecular Plant* 5, 98-114.
- 1158
- 1159 DeWire, S.M., Yamashita, D.S., Rominger, D.H., Liu, G., Cowan, C.L., Graczyk, T.M., Chen, X.-  
1160 T., Pitis, P.M., Gotchev, D., Yuan, C., *et al.* (2013). A G protein-biased ligand at the  $\mu$ -opioid

1161 receptor is potently analgesic with reduced gastrointestinal and respiratory dysfunction compared  
1162 with morphine. *Journal of Pharmacology and Experimental Therapeutics* 344, 708-717.  
1163  
1164 Dhonukshe, P., Aniento, F., Hwang, I., Robinson, D.G., Mravec, J., Stierhof, Y.-D., and Friml, J.  
1165 (2007). Clathrin-mediated constitutive endocytosis of PIN auxin efflux carriers in Arabidopsis.  
1166 *Current Biology* 17, 520-527.  
1167  
1168 Ding, L., Pandey, S., and Assmann, S.M. (2008). Arabidopsis extra-large G proteins (XLGs)  
1169 regulate root morphogenesis. *The Plant Journal* 53, 248-263.  
1170  
1171 Droillard, M.-J., Boudsocq, M., Barbier-Brygoo, H., and Lauriere, C. (2004). Involvement of  
1172 MPK4 in osmotic stress response pathways in cell suspensions and plantlets of Arabidopsis  
1173 thaliana: activation by hypoosmolarity and negative role in hyperosmolarity tolerance. *FEBS*  
1174 *Letters* 574, 42-48.  
1175  
1176 Eichel, K., and von Zastrow, M. (2018). Subcellular organization of GPCR signaling. *Trends in*  
1177 *Pharmacological Sciences* 39, 200-208.  
1178  
1179 Escudero, V., Jordá, L., Sopena-Torres, S., Mélida, H., Miedes, E., Muñoz-Barrios, A., Swami, S.,  
1180 Alexander, D., McKee, L.S., Sánchez-Vallet, A., *et al.* (2017). Alteration of cell wall xylan  
1181 acetylation triggers defense responses that counterbalance the immune deficiencies of plants  
1182 impaired in the  $\beta$ -subunit of the heterotrimeric G-protein. *The Plant Journal* 92, 386-399.  
1183  
1184 Fan, L., Li, R., Pan, J., Ding, Z., and Lin, J. (2015). Endocytosis and its regulation in plants. *Trends*  
1185 *in Plant Science* 20, 388-397.  
1186  
1187 Felix, G., Duran, J.D., Volko, S., and Boller, T. (1999). Plants have a sensitive perception system  
1188 for the most conserved domain of bacterial flagellin. *The Plant Journal* 18, 265-276.  
1189  
1190 Ferguson, K.M., Higashijima, T., Smigel, M.D., and Gilman, A.G. (1986). The influence of bound  
1191 GDP on the kinetics of guanine nucleotide binding to G proteins. *J Biol Chem* 261, 7393-7399.  
1192  
1193 Fernie, A.R., Roessner, U., and Geigenberger, P. (2001). The sucrose analog palatinose leads to a  
1194 stimulation of sucrose degradation and starch synthesis when supplied to discs of growing potato  
1195 tubers. *Plant Physiol* 125, 1967-1977.  
1196  
1197 Fu, Y., Lim, S., Urano, D., Tunc-Ozdemir, M., Phan, N., Elston, T., and Jones, A. (2014a).  
1198 Reciprocal encoding of signal intensity and duration in a glucose-sensing circuit. *Cell* 156, 1084-  
1199 1096.  
1200  
1201 Fu, Y., Lim, S., Urano, D., Tunc-Ozdemir, M., Phan, N.G., Elston, T.C., and Jones, A.M. (2014b).  
1202 Reciprocal encoding of signal intensity and duration in a glucose-sensing circuit. *Cell* 156, 1084-  
1203 1095.  
1204

- 1205 Géhin, M., Vivat, V., Wurtz, J.-M., Losson, R., Chambon, P., Moras, D., and Gronemeyer, H.  
1206 (1999). Structural basis for engineering of retinoic acid receptor isotype-selective agonists and  
1207 antagonists. *Chemistry & Biology* 6, 519-529.  
1208
- 1209 Gesty-Palmer, D., Chen, M., Reiter, E., Ahn, S., Nelson, C.D., Wang, S., Eckhardt, A.E., Cowan,  
1210 C.L., Spurney, R.F., Luttrell, L.M., *et al.* (2006). Distinct  $\beta$ -arrestin- and G protein-dependent  
1211 pathways for parathyroid hormone receptor-stimulated ERK1/2 activation. *Journal of Biological*  
1212 *Chemistry* 281, 10856-10864.  
1213
- 1214 Gómez-Gómez, L., and Boller, T. (2000). FLS2: An LRR receptor-like kinase involved in the  
1215 perception of the bacterial elicitor flagellin in *Arabidopsis*. *Molecular Cell* 5, 1003-1011.  
1216
- 1217 Grigston, J.C., Osuna, D., Scheible, W.R., Stitt, M., and Jones, A.M. (2008). D-glucose sensing  
1218 by a plasma membrane regulator of G signaling protein, AtRGS1. *FEBS Lett* 582, 3577-3584.  
1219 Gurevich, E., and Gurevich, V. (2006). Arrestins: ubiquitous regulators of cellular signaling  
1220 pathways. *Genome Biol* 7, 236.  
1221
- 1222 Hao, H., Fan, L., Chen, T., Li, R., Li, X., He, Q., Botella, M.A., and Lin, J. (2014). Clathrin and  
1223 membrane microdomains cooperatively regulate RbohD dynamics and activity in *Arabidopsis*.  
1224 *The Plant Cell* 26, 1729-1745.  
1225
- 1226 Hirsch, J., Schubert, C., Gurevich, V., and Sigler, P. (1999). The 2.8 Å crystal structure of visual  
1227 arrestin: a model for arrestin's regulation. *Cell* 97, 257 - 269.  
1228
- 1229 Huot, B., Yao, J., Montgomery, B.L., and He, S.Y. (2014). Growth–defense tradeoffs in plants: A  
1230 balancing act to optimize fitness. *Molecular Plant* 7, 1267-1287.  
1231
- 1232 Ilangumaran, S., and Hoessli, D.C. (1998). Effects of cholesterol depletion by cyclodextrin on the  
1233 sphingolipid microdomains of the plasma membrane. *Biochemical Journal* 335, 433-440.  
1234  
1235
- 1236 Irani, N.G., Di Rubbo, S., Mylle, E., Van den Begin, J., Schneider-Pizoń, J., Hniliková, J., Šiša,  
1237 M., Buyst, D., Vilarrasa-Blasi, J., Szatmári, A.-M., *et al.* (2012). Fluorescent castasterone reveals  
1238 BRI1 signaling from the plasma membrane. *Nature chemical biology* 8, 583.  
1239
- 1240 Jackson, L.P., Kelly, B.T., McCoy, A.J., Gaffry, T., James, L.C., Collins, B.M., Höning, S., Evans,  
1241 P.R., and Owen, D.J. (2010). A large-scale conformational change couples membrane recruitment  
1242 to cargo binding in the AP2 clathrin adaptor Complex. *Cell* 141, 1220-1229.  
1243
- 1244 Jelenska, J., Davern, S.M., Standaert, R.F., Mirzadeh, S., and Greenberg, J.T. (2017). Flagellin  
1245 peptide flg22 gains access to long-distance trafficking in *Arabidopsis* via its receptor, FLS2.  
1246 *Journal of Experimental Botany* 68, 1769-1783.  
1247
- 1248 Jha, S.G., Larson, E.R., Humble, J., Domozych, D.S., Barrington, D.S., and Tierney, M.L. (2018).  
1249 Vacuolar Protein Sorting 26C encodes an evolutionarily conserved large retromer subunit in

- 1250 eukaryotes that is important for root hair growth in *Arabidopsis thaliana*. *The Plant Journal* *94*,  
1251 595-611.
- 1252
- 1253 Johnston, C.A., Taylor, J.P., Gao, Y., Kimple, A.J., Grigston, J.C., Chen, J.-G., Siderovski, D.P.,  
1254 Jones, A.M., and Willard, F.S. (2007). GTPase acceleration as the rate-limiting step in *Arabidopsis*  
1255 G protein-coupled sugar signaling. *Proceedings of the National Academy of Sciences* *104*, 17317-  
1256 17322.
- 1257
- 1258 Jones, J., Duffy, J., M, M., Temple, B., Dohlman, H., and Jones, A. (2011a). The crystal structure  
1259 of a self-activating G protein  $\alpha$  subunit reveals its distinct mechanism of signal initiation. *Sci*  
1260 *Signal* *4*, ra8.
- 1261
- 1262 Jones, J.C., Temple, B.R.S., Jones, A.M., and Dohlman, H.G. (2011b). Functional reconstitution  
1263 of an atypical G protein heterotrimer and regulator of G protein signaling protein (RGS1) from  
1264 *Arabidopsis thaliana*. *Journal of Biological Chemistry* *286*, 13143-13150.
- 1265
- 1266 Kalderon, D., Roberts, B.L., Richardson, W.D., and Smith, A.E. (1984). A short amino acid  
1267 sequence able to specify nuclear location. *Cell* *39*, 499-509.
- 1268
- 1269 Kang, Y., Zhou, X.E., Gao, X., He, Y., Liu, W., Ishchenko, A., Barty, A., White, T.A., Yefanov,  
1270 O., Han, G.W., *et al.* (2015). Crystal structure of rhodopsin bound to arrestin by femtosecond X-  
1271 ray laser. *Nature* *523*, 561.
- 1272
- 1273 Keinath, N.F., Waadt, R., Brugman, R., Schroeder, Julian I., Grossmann, G., Schumacher, K., and  
1274 Krebs, M. (2015). Live cell imaging with R-GECO1 sheds light on flg22- and chitin-induced  
1275 transient  $[Ca^{2+}]_{cyt}$  patterns in *Arabidopsis*. *Molecular Plant* *8*, 1188-1200.
- 1276
- 1277 Kelly, B.T., McCoy, A.J., Späte, K., Miller, S.E., Evans, P.R., Höning, S., and Owen, D.J. (2008).  
1278 A structural explanation for the binding of endocytic dileucine motifs by the AP2 complex. *Nature*  
1279 *456*, 976.
- 1280
- 1281 Kim, M., Vishnivetskiy, S.A., Van Eps, N., Alexander, N.S., Cleghorn, W.M., Zhan, X., Hanson,  
1282 S.M., Morizumi, T., Ernst, O.P., Meiler, J., *et al.* (2012). Conformation of receptor-bound visual  
1283 arrestin. *Proceedings of the National Academy of Sciences* *109*, 18407-18412.
- 1284
- 1285 Kim, S.Y., Xu, Z.-Y., Song, K., Kim, D.H., Kang, H., Reichardt, I., Sohn, E.J., Friml, J., Juergens,  
1286 G., and Hwang, I. (2013). Adaptor protein complex 2-mediated endocytosis is crucial for male  
1287 reproductive organ development in *Arabidopsis*. *The Plant Cell* *25*, 2970-2985.
- 1288
- 1289 Klopffleisch, K., Phan, N., Augustin, K., Bayne, R.S., Booker, K.S., Botella, J.R., Carpita, N.C.,  
1290 Carr, T., Chen, J.-G., Cooke, T.R., *et al.* (2011). *Arabidopsis* G-protein interactome reveals  
1291 connections to cell wall carbohydrates and morphogenesis. *Mol Syst Biol* *7*, 532.
- 1292
- 1293 Krauss, M., Kukhtina, V., Pechstein, A., and Haucke, V. (2006a). Stimulation of  
1294 phosphatidylinositol kinase type I-mediated phosphatidylinositol (4,5)-bisphosphate synthesis by  
1295 AP-2 $\mu$ -cargo complexes. *Proceedings of the National Academy of Sciences* *103*, 11934-11939.

- 1296  
1297 Krauss, M., Kukhtina, V., Pechstein, A., and Haucke, V. (2006b). Stimulation of  
1298 phosphatidylinositol kinase type I-mediated phosphatidylinositol (4, 5)-bisphosphate synthesis by  
1299 AP-2 $\mu$ -cargo complexes. *Proceedings of the National Academy of Sciences* *103*, 11934-11939.  
1300  
1301 Lee, J., Eschen-Lippold, L., Lassowskat, I., Böttcher, C., and Scheel, D. (2015). Cellular  
1302 reprogramming through mitogen-activated protein kinases. *Frontiers in Plant Science* *6*.  
1303  
1304 Li, L., and Sheen, J. (2016). Dynamic and diverse sugar signaling. *Current Opinion in Plant*  
1305 *Biology* *33*, 116-125.  
1306  
1307 Li, R., Liu, P., Wan, Y., Chen, T., Wang, Q., Mettbach, U., Baluška, F., Šamaj, J., Fang, X., Lucas,  
1308 W.J., *et al.* (2012a). A Membrane Microdomain-Associated Protein, Arabidopsis Flot1, Is  
1309 Involved in a Clathrin-Independent Endocytic Pathway and Is Required for Seedling  
1310 Development. *The Plant Cell* *24*, 2105-2122.  
1311 Li, R., Liu, P., Wan, Y., Chen, T., Wang, Q., Mettbach, U., Baluška, F., Šamaj, J., Fang, X., Lucas,  
1312 W.J., *et al.* (2012b). A membrane microdomain-associated protein, Arabidopsis Flot1, is involved  
1313 in a clathrin-independent endocytic pathway and is required for seedling development. *The Plant*  
1314 *Cell* *24*, 2105-2122.  
1315  
1316 Li, X., Wang, X., Yang, Y., Li, R., He, Q., Fang, X., Luu, D.-T., Maurel, C., and Lin, J. (2011).  
1317 Single-molecule analysis of PIP2;1 Dynamics and partitioning reveals multiple modes of  
1318 *Arabidopsis* plasma membrane aquaporin regulation. *The Plant Cell* *23*, 3780-3797.  
1319  
1320 Liang, X., Ma, M., Zhou, Z., Wang, J., Yang, X., Rao, S., Bi, G., Li, L., Zhang, X., Chai, J., *et al.*  
1321 (2018). Ligand-triggered de-repression of Arabidopsis heterotrimeric G proteins coupled to  
1322 immune receptor kinases. *Cell Research*.  
1323  
1324 Liao, K.-L., Melvin, C.E., Sozzani, R., Jones, R.D., Elston, T.C., and Jones, A.M. (2017). Dose-  
1325 Duration Reciprocity for G protein activation: Modulation of kinase to substrate ratio alters cell  
1326 signaling. *PLoS ONE* *12*, e0190000.  
1327  
1328 Lin, W.-W., and Hsieh, S.-L. (2011). Decoy receptor 3: A pleiotropic immunomodulator and  
1329 biomarker for inflammatory diseases, autoimmune diseases and cancer. *Biochemical*  
1330 *Pharmacology* *81*, 838-847.  
1331  
1332 Lohse, M., Benovic, J., Codina, J., Caron, M., and Lefkowitz, R. (1990). beta-Arrestin: a protein  
1333 that regulates beta-adrenergic receptor function. *Science* *248*, 1547 - 1550.  
1334  
1335 Loreti, E., Alpi, A., and Perata, P. (2000). Glucose and disaccharide-sensing mechanisms modulate  
1336 the expression of alpha -amylase in barley embryos. *Plant Physiol* *123*, 939-948.  
1337  
1338 Luttrell, L.M., Roudabush, F.L., Choy, E.W., Miller, W.E., Field, M.E., Pierce, K.L., and  
1339 Lefkowitz, R.J. (2001). Activation and targeting of extracellular signal-regulated kinases by  $\beta$ -  
1340 arrestin scaffolds. *Proceedings of the National Academy of Sciences* *98*, 2449-2454.  
1341

- 1342 Manglik, A., Lin, H., Aryal, D.K., McCorvy, J.D., Dengler, D., Corder, G., Levit, A., Kling, R.C.,  
1343 Bernat, V., Hübner, H., *et al.* (2016). Structure-based discovery of opioid analgesics with reduced  
1344 side effects. *Nature* 537, 185.
- 1345  
1346 Martí-Renom, M.A., Stuart, A.C., Fiser, A., Sánchez, R., and, F.M., and Šali, A. (2000).  
1347 Comparative protein structure modeling of genes and genomes. *Annual Review of Biophysics and*  
1348 *Biomolecular Structure* 29, 291-325.
- 1349  
1350 Mudgil, Y., Karve, A., Teixeira, P., Jiang, K., Tunc-Ozdemir, M., and Jones, A. (2016).  
1351 Photosynthate regulation of the root system architecture mediated by the heterotrimeric G protein  
1352 complex in *Arabidopsis*. *Frontiers in Plant Science* 7.
- 1353  
1354 Nobles, K.N., Xiao, K., Ahn, S., Shukla, A.K., Lam, C.M., Rajagopal, S., Strachan, R.T., Huang,  
1355 T.-Y., Bressler, E.A., Hara, M.R., *et al.* (2011). Distinct phosphorylation sites on the  $\beta_2$ -adrenergic  
1356 receptor establish a barcode that encodes differential functions of  $\beta$ -arrestin. *Science Signaling* 4,  
1357 ra51-ra51.
- 1358  
1359 Ohno, H., Stewart, J., Fournier, M., Bosshart, H., Rhee, I., Miyatake, S., Saito, T., Gallusser, A.,  
1360 Kirchhausen, T., and Bonifacino, J. (1995). Interaction of tyrosine-based sorting signals with  
1361 clathrin-associated proteins. *Science* 269, 1872-1875.
- 1362  
1363 Ohtani, Y., Irie, T., Uekama, K., Fukunaga, K., and Pitha, J. (1989 ). Differential effects of alpha-  
1364 , beta- and gamma-cyclodextrins on human erythrocytes. *Eur J Biochem* 186, 17-22.
- 1365  
1366 Oliviusson, P., Heinzerling, O., Hillmer, S., Hinz, G., Tse, Y.C., Jiang, L., and Robinson, D.G.  
1367 (2006). Plant retromer, Localized to the prevacuolar compartment and microvesicles in  
1368 *Arabidopsis*, may interact with vacuolar sorting receptors. *The Plant Cell* 18, 1239-1252.
- 1369  
1370 Pan, G., Ni, J., Wei, Y.-F., Yu, G.-l., Gentz, R., and Dixit, V.M. (1997). An antagonist decoy  
1371 receptor and a death domain-containing receptor for TRAIL. *Science* 277, 815-818.
- 1372  
1373 Peterson, Y.K., and Luttrell, L.M. (2017). The diverse roles of arrestin scaffolds in G protein–  
1374 coupled receptor signaling. *Pharmacological Reviews* 69, 256-297.
- 1375  
1376 Pharr, D., and Keller, F. (2017). In photoassimilate distribution plants and crops source-sink  
1377 relationships (Routledge), pp. 157-183.
- 1378  
1379 Raffaele, S., Bayer, E., Lafarge, D., Cluzet, S., German Retana, S., Boubekour, T., Leborgne-  
1380 Castel, N., Carde, J.-P., Lherminier, J., Noiro, E., *et al.* (2009). Remorin, a solanaceae protein  
1381 resident in membrane rafts and plasmodesmata, impairs potato virus X movement. *The Plant Cell*  
1382 21, 1541-1555.
- 1383  
1384 Rajagopal, S., Kim, J., Ahn, S., Craig, S., Lam, C.M., Gerard, N.P., Gerard, C., and Lefkowitz,  
1385 R.J. (2010a).  $\beta$ -arrestin- but not G protein-mediated signaling by the “decoy” receptor CXCR7.  
1386 *Proceedings of the National Academy of Sciences* 107, 628-632.
- 1387

- 1388 Rajagopal, S., Rajagopal, K., and Lefkowitz, R.J. (2010b). Teaching old receptors new tricks:  
1389 biasing seven-transmembrane receptors. *Nature Reviews Drug Discovery* 9, 373.  
1390
- 1391 Ranf, S., Eschen-Lippold, L., Pecher, P., Lee, J., and Scheel, D. (2011). Interplay between calcium  
1392 signalling and early signalling elements during defence responses to microbe- or damage-  
1393 associated molecular patterns. *The Plant Journal* 68, 100-113.  
1394
- 1395 Rives, M.-L., Rossillo, M., Liu-Chen, L.-Y., and Javitch, J.A. (2012). 6'-Guanidinonaltrindole (6'-  
1396 GNTI) is a G protein-biased  $\kappa$ -opioid receptor agonist that inhibits arrestin recruitment. *Journal*  
1397 *of Biological Chemistry* 287, 27050-27054.  
1398
- 1399 Rolland, F., Moore, B., and Sheen, J. (2002). Sugar sensing and signaling in plants. *The Plant Cell*  
1400 14, S185-S205.  
1401
- 1402 Schindelin, J., Arganda-Carreras, I., Frise, E., Kaynig, V., Longair, M., Pietzsch, T., Preibisch, S.,  
1403 Rueden, C., Saalfeld, S., Schmid, B., *et al.* (2012). Fiji: an open-source platform for biological-  
1404 image analysis. *Nature Methods* 9, 676.  
1405
- 1406 Shenoy, S.K., Drake, M.T., Nelson, C.D., Houtz, D.A., Xiao, K., Madabushi, S., Reiter, E.,  
1407 Premont, R.T., Lichtarge, O., and Lefkowitz, R.J. (2006).  $\beta$ -Arrestin-dependent, G protein-  
1408 independent ERK1/2 activation by the  $\beta$ 2 adrenergic receptor. *Journal of Biological Chemistry*  
1409 281, 1261-1273.  
1410
- 1411 Shi, H., Rojas, R., Bonifacino, J.S., and Hurley, J.H. (2006). The retromer subunit Vps26 has an  
1412 arrestin fold and binds Vps35 through its C-terminal domain. *Nature Structural & Molecular*  
1413 *Biology* 13, 540-548.  
1414
- 1415 Shiraishi, Y., Natsume, M., Kofuku, Y., Imai, S., Nakata, K., Mizukoshi, T., Ueda, T., Iwai, H.,  
1416 and Shimada, I. (2018). Phosphorylation-induced conformation of  $\beta$ 2-adrenoceptor related to  
1417 arrestin recruitment revealed by NMR. *Nature Communications* 9, 194.  
1418
- 1419 Shiu, S.H., and Bleecker, A.B. (2001). Plant receptor-like gene family: diversity, function, and  
1420 signaling. *Science STKE Dec. 18th*, RE22.  
1421
- 1422 Shukla, A.K., Manglik, A., Kruse, A.C., Xiao, K., Reis, R.I., Tseng, W.-C., Staus, D.P., Hilger,  
1423 D., Uysal, S., Huang, L.-Y., *et al.* (2013). Structure of active  $\beta$ -arrestin-1 bound to a G-protein-  
1424 coupled receptor phosphopeptide. *Nature* 497, 137.  
1425
- 1426 Sibley, D.R., Benovic, J.L., Caron, M.G., and Lefkowitz, R.J. (1987). Regulation of  
1427 transmembrane signaling by receptor phosphorylation. *Cell* 48, 913-922.  
1428
- 1429 Sinha, A.K., Hofmann, M.G., Romer, U., Kockenberger, W., Elling, L., and Roitsch, T. (2002).  
1430 Metabolizable and non-metabolizable sugars activate different signal transduction pathways in  
1431 tomato. *Plant Physiol* 128, 1480-1489.  
1432



- 1433 Smith, J.S., Lefkowitz, R.J., and Rajagopal, S. (2018). Biased signalling: from simple switches to  
1434 allosteric microprocessors. *Nature Reviews Drug Discovery* 17, 243.  
1435
- 1436 Sun, Y., Li, L., Macho, A.P., Han, Z., Hu, Z., Zipfel, C., Zhou, J.-M., and Chai, J. (2013). Structural  
1437 basis for flg22-induced activation of the *Arabidopsis* FLS2-BAK1 immune complex. *Science* 342,  
1438 624-628.  
1439
- 1440 Tunc-Ozdemir, M., and Jones, A.M. (2017). Ligand-induced dynamics of heterotrimeric G  
1441 protein-coupled receptor-like kinase complexes. *PLoS ONE* 12, e0171854.  
1442
- 1443 Tunc-Ozdemir, M., Li, B., Jaiswal, D.K., Urano, D., Jones, A.M., and Torres, M.P. (2017).  
1444 Predicted functional implications of phosphorylation of regulator of G protein signaling protein in  
1445 plants. *Frontiers in Plant Science* 8.  
1446
- 1447 Tunc-Ozdemir, M., Liao, K.-L., Ross-Elliott, T.J., Elston, T.C., and Jones, A.M. (2018). Long-  
1448 distance communication in *Arabidopsis* involving a self-activating G protein. *Plant Direct* 2,  
1449 e00037.  
1450
- 1451 Tunc-Ozdemir, M., Urano, D., Jaiswal, D.K., Clouse, S.D., and Jones, A.M. (2016). Direct  
1452 modulation of heterotrimeric G protein-coupled signaling by a receptor kinase complex. *Journal*  
1453 *of Biological Chemistry* 291, 13918-13925.  
1454
- 1455 Urano, D., Maruta, N., Trusov, Y., Stoian, R., Liang, Y., Jaiswal, D., Thung, L., Botella, J., and  
1456 Jones, A. (2016). Saltatory evolution of the heterotrimeric G protein signaling mechanisms in the  
1457 plant kingdom. *Science Signaling* 9, ra93.  
1458
- 1459 Urano, D., Phan, N., Jones, J.C., Yang, J., Huang, J., Grigston, J., Philip Taylor, J., and Jones,  
1460 A.M. (2012a). Endocytosis of the seven-transmembrane RGS1 protein activates G-protein-  
1461 coupled signalling in *Arabidopsis*. *Nat Cell Biol* 14, 1079-1088.  
1462
- 1463 Urano, D., Phan, N., Jones, J.C., Yang, J., Huang, J., Grigston, J., Taylor, J.P., and Jones, A.M.  
1464 (2012b). Endocytosis of the seven-transmembrane RGS1 protein activates G-protein-coupled  
1465 signalling in *Arabidopsis*. *Nature Cell Biology* 14, 1079-1088.  
1466
- 1467 Urs, N.M., Gee, S.M., Pack, T.F., McCorvy, J.D., Evron, T., Snyder, J.C., Yang, X., Rodriguiz,  
1468 R.M., Borrelli, E., Wetsel, W.C., *et al.* (2016). Distinct cortical and striatal actions of a  $\beta$ -arrestin-  
1469 biased dopamine D2 receptor ligand reveal unique antipsychotic-like properties. *Proceedings of*  
1470 *the National Academy of Sciences* 113, E8178-E8186.  
1471
- 1472 Urs, N.M., Peterson, S.M., and Caron, M.G. (2017). New concepts in dopamine D2 receptor biased  
1473 signaling and implications for schizophrenia therapy. *Biological Psychiatry* 81, 78-85.  
1474
- 1475 Vang, S., Seitz, K., and Krysan, P. (2018). A simple microfluidic device for live cell imaging of  
1476 *Arabidopsis* cotyledons, leaves, and seedlings. *Biotechniques* 64, 255-261.  
1477

- 1478 Vishnivetskiy, S.A., Gimenez, L.E., Francis, D.J., Hanson, S.M., Hubbell, W.L., Klug, C.S., and  
1479 Gurevich, V.V. (2011). Few residues within an extensive binding interface drive receptor  
1480 interaction and determine the specificity of arrestin proteins. *Journal of Biological Chemistry* 286,  
1481 24288-24299.
- 1482
- 1483 Vishnivetskiy, S.A., Paz, C.L., Schubert, C., Hirsch, J.A., Sigler, P.B., and Gurevich, V.V. (1999).  
1484 How does arrestin respond to the phosphorylated state of rhodopsin? *Journal of Biological*  
1485 *Chemistry* 274, 11451-11454.
- 1486
- 1487 Wen, W., Meinkoth, J.L., Tsien, R.Y., and Taylor, S.S. (1995). Identification of a signal for rapid  
1488 export of proteins from the nucleus. *Cell* 82, 463-473.
- 1489
- 1490 White, K.L., Robinson, J.E., Zhu, H., DiBerto, J.F., Polepally, P.R., Zjawiony, J.K., Nichols, D.E.,  
1491 Malanga, C.J., and Roth, B.L. (2015). The G protein–biased opioid receptor agonist RB-64 is  
1492 analgesic with a unique spectrum of activities *in vivo*. *Journal of Pharmacology and Experimental*  
1493 *Therapeutics* 352, 98-109.
- 1494
- 1495 Williams, L.E., Lemoine, R., and Sauer, N. (2000). Sugar transporters in higher plants – a diversity  
1496 of roles and complex regulation. *Trends in Plant Science* 5, 283-290.
- 1497
- 1498 Wingler, L.M., Elgeti, M., Hilger, D., Latorraca, N.R., Lerch, M.T., Staus, D.P., Dror, R.O.,  
1499 Kobilka, B.K., Hubbell, W.L., and Lefkowitz, R.J. (2019). Angiotensin analogs with divergent  
1500 bias stabilize distinct receptor conformations. *Cell* 176, 468-478.e411.
- 1501
- 1502 Wu, L., and Birch, R. (2011). Isomaltulose is actively metabolized in plant cells. *Plant Physiol*  
1503 *157*, 2094-2101.
- 1504
- 1505 Yang, F., Yu, X., Liu, C., Qu, C.-X., Gong, Z., Liu, H.-D., Li, F.-H., Wang, H.-M., He, D.-F., Yi,  
1506 F., *et al.* (2015). Phospho-selective mechanisms of arrestin conformations and functions revealed  
1507 by unnatural amino acid incorporation and 19F-NMR. *Nature Communications* 6, 8202.
- 1508
- 1509 Yang, Z., Yang, F., Zhang, D., Liu, Z., Lin, A., Liu, C., Xiao, P., Yu, X., and Sun, J.-P. (2017).  
1510 Phosphorylation of G Protein-Coupled Receptors: From the Barcode Hypothesis to the Flute  
1511 Model. *Molecular pharmacology* 92, 201-210.
- 1512
- 1513 Zaman, N., Seitz, K., Kabir, M., George-Schreder, L.S., Shepstone, I., Liu, Y., Zhang, S., and  
1514 Krysan, P.J. (2019). A Förster resonance energy transfer sensor for live-cell imaging of mitogen-  
1515 activated protein kinase activity in Arabidopsis. *The Plant Journal* 97, 970-983.
- 1516
- 1517 Zelazny, E., Santambrogio, M., Pourcher, M., Chambrier, P., Berne-Dedieu, A., Fobis-Loisy, I.,  
1518 Miège, C., Jaillais, Y., and Gaude, T. (2013). Mechanisms governing the endosomal membrane  
1519 recruitment of the core retromer in Arabidopsis. *Journal of Biological Chemistry* 288, 8815-8825.
- 1520
- 1521 Zhan, X., Gimenez, L.E., Gurevich, V.V., and Spiller, B.W. (2011). Crystal structure of arrestin-  
1522 3 reveals the basis of the difference in receptor binding between two non-visual subtypes. *Journal*  
1523 *of Molecular Biology* 406, 467-478.

1524  
1525  
1526  
1527  
1528  
1529  
1530  
1531  
1532  
1533  
1534  
1535  
1536  
1537  
1538  
1539  
1540

Zhong, C.-L., Zhang, C., and Liu, J.-Z. (2018). Heterotrimeric G protein signaling in plant immunity. *Journal of Experimental Botany* 70, 1109-1118.

1541 Figure 1  
1542

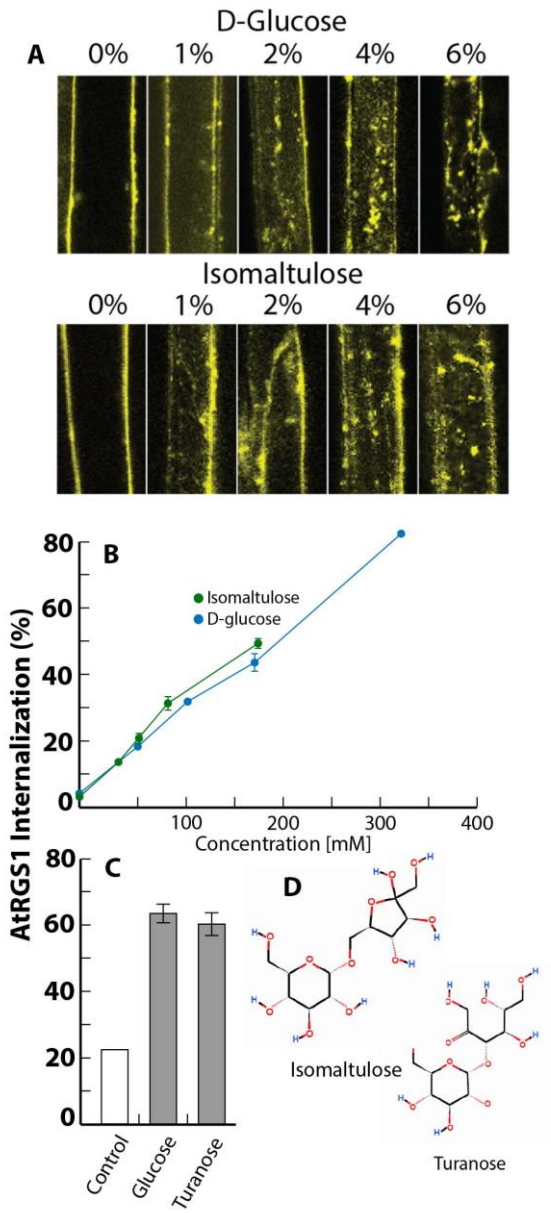

1543  
1544  
1545  
1546  
1547  
1548  
1549  
1550

1551 Figure 2  
1552

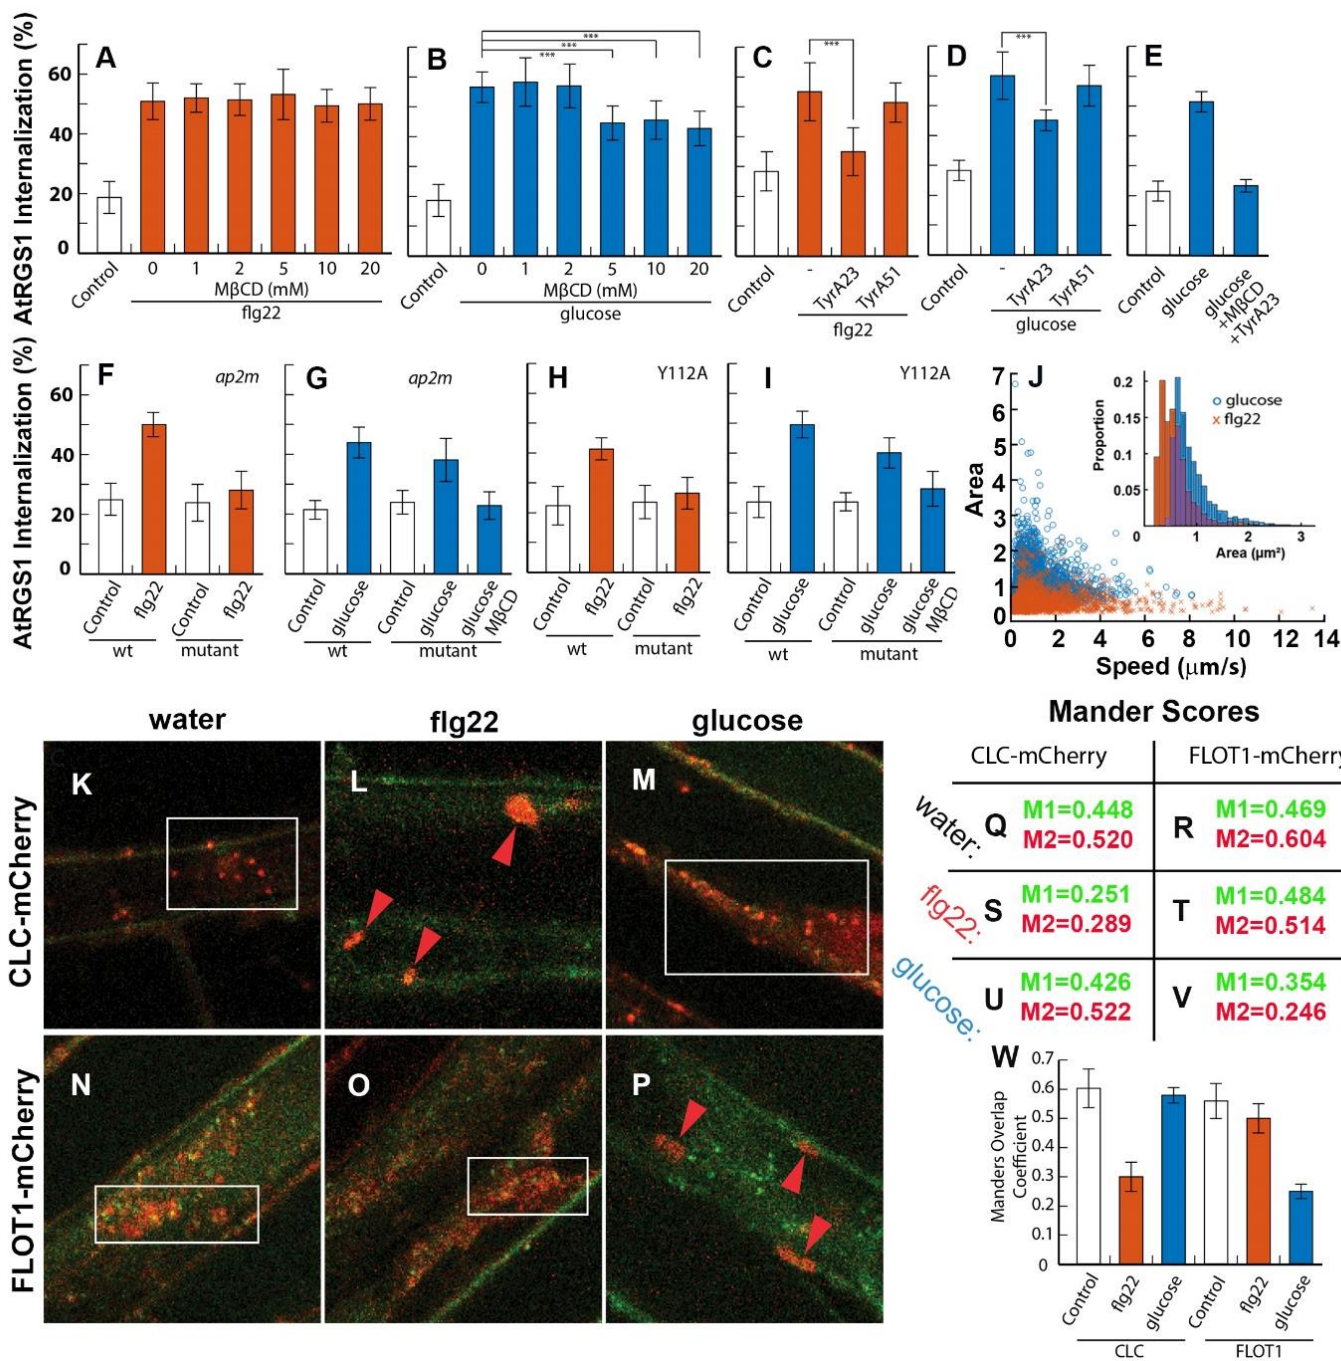

1553  
1554  
1555  
1556  
1557  
1558  
1559  
1560

1561 Figure 3  
1562

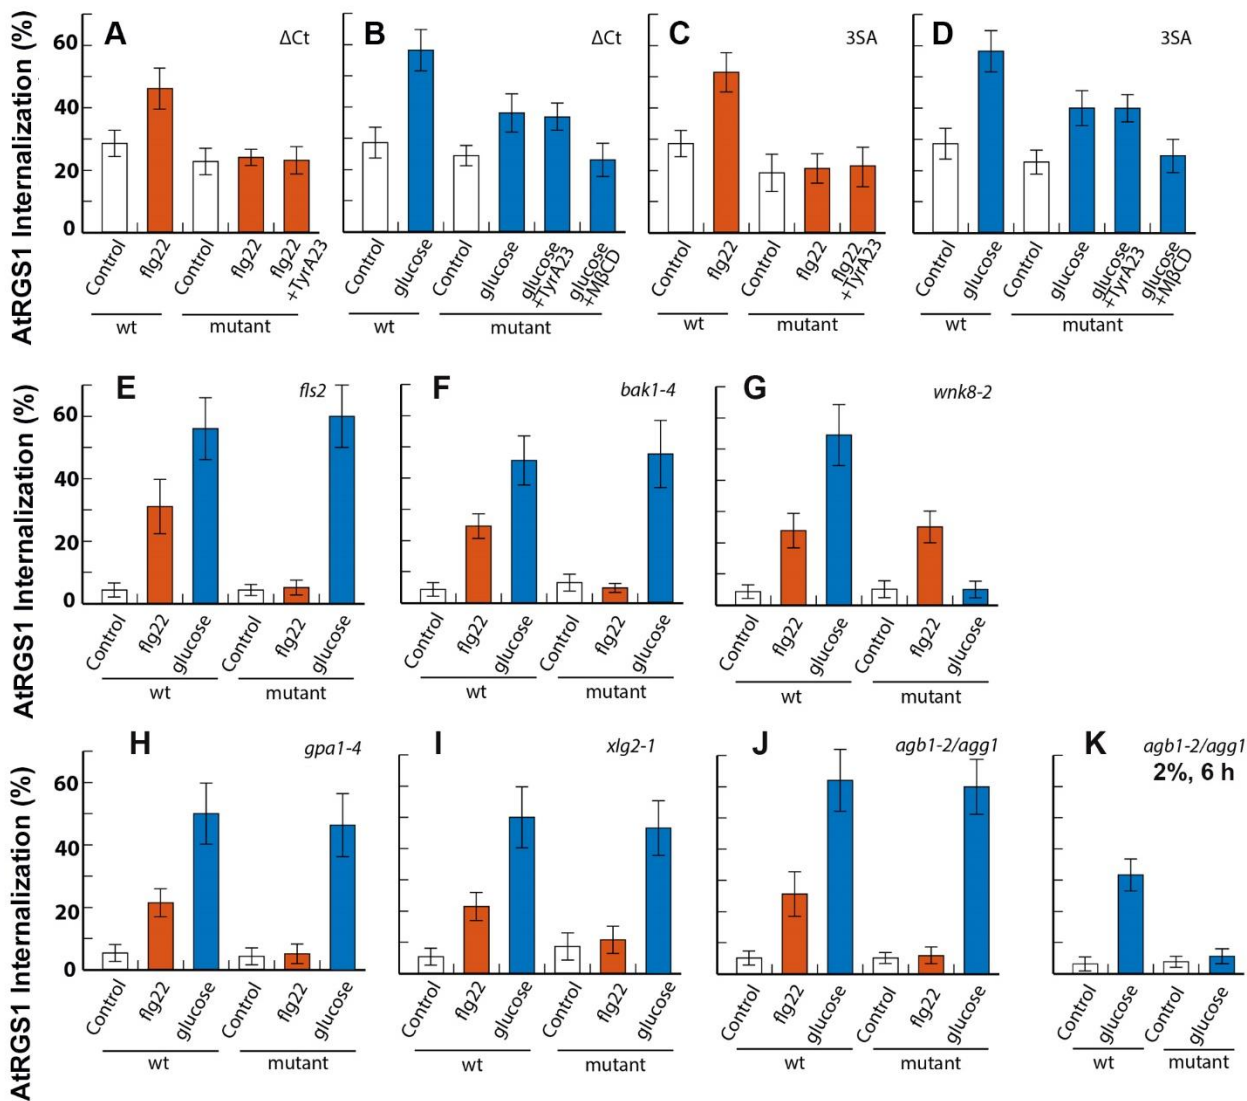

1563  
1564  
1565  
1566  
1567  
1568  
1569  
1570  
1571  
1572  
1573  
1574  
1575  
1576  
1577

1578 Figure 4  
1579

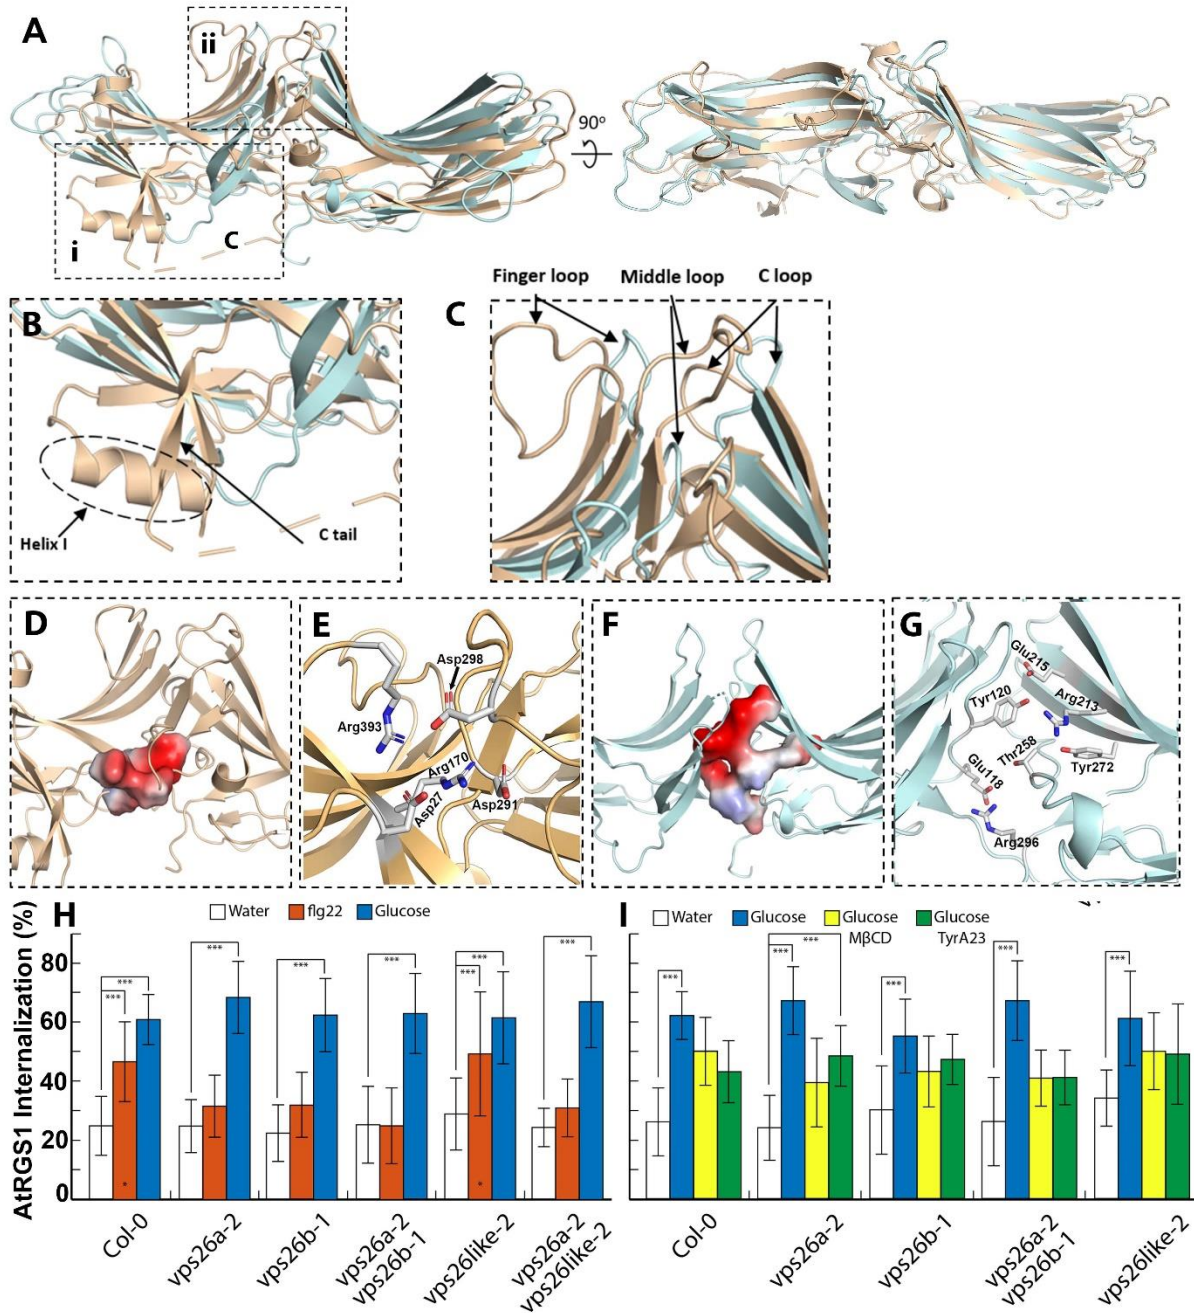

1580  
1581  
1582  
1583  
1584  
1585  
1586  
1587

1588 Figure 5  
1589

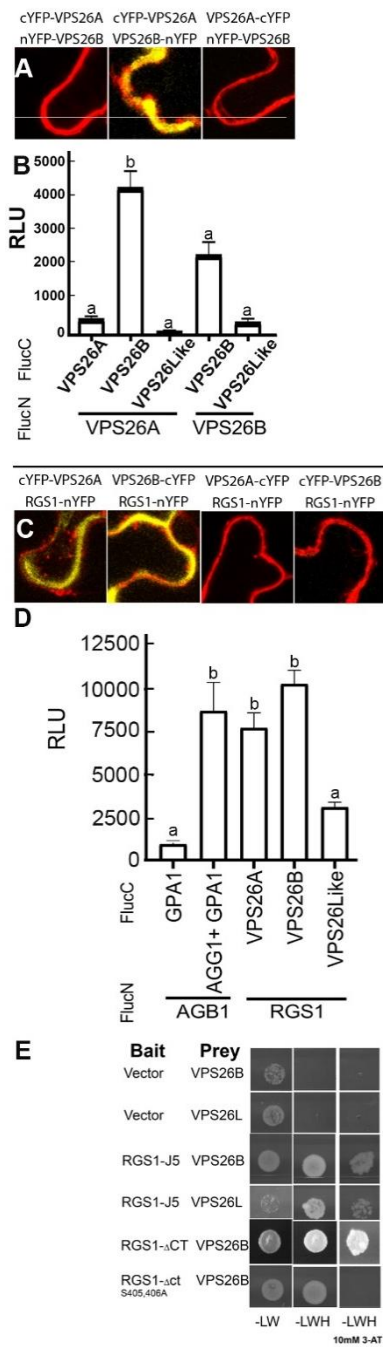

1590  
1591  
1592  
1593  
1594  
1595  
1596  
1597



1598 Figure 6  
1599

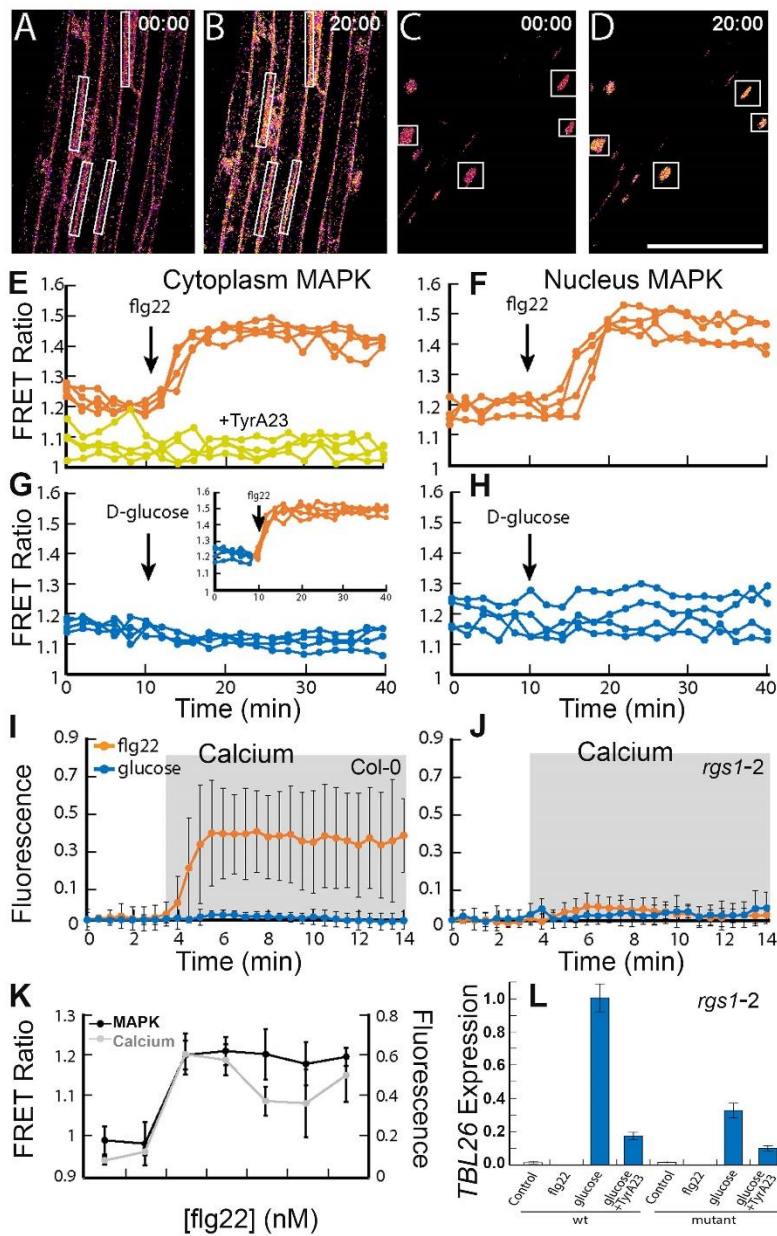

1600  
1601  
1602  
1603  
1604  
1605  
1606  
1607  
1608  
1609  
1610

1611 Figure 7  
1612

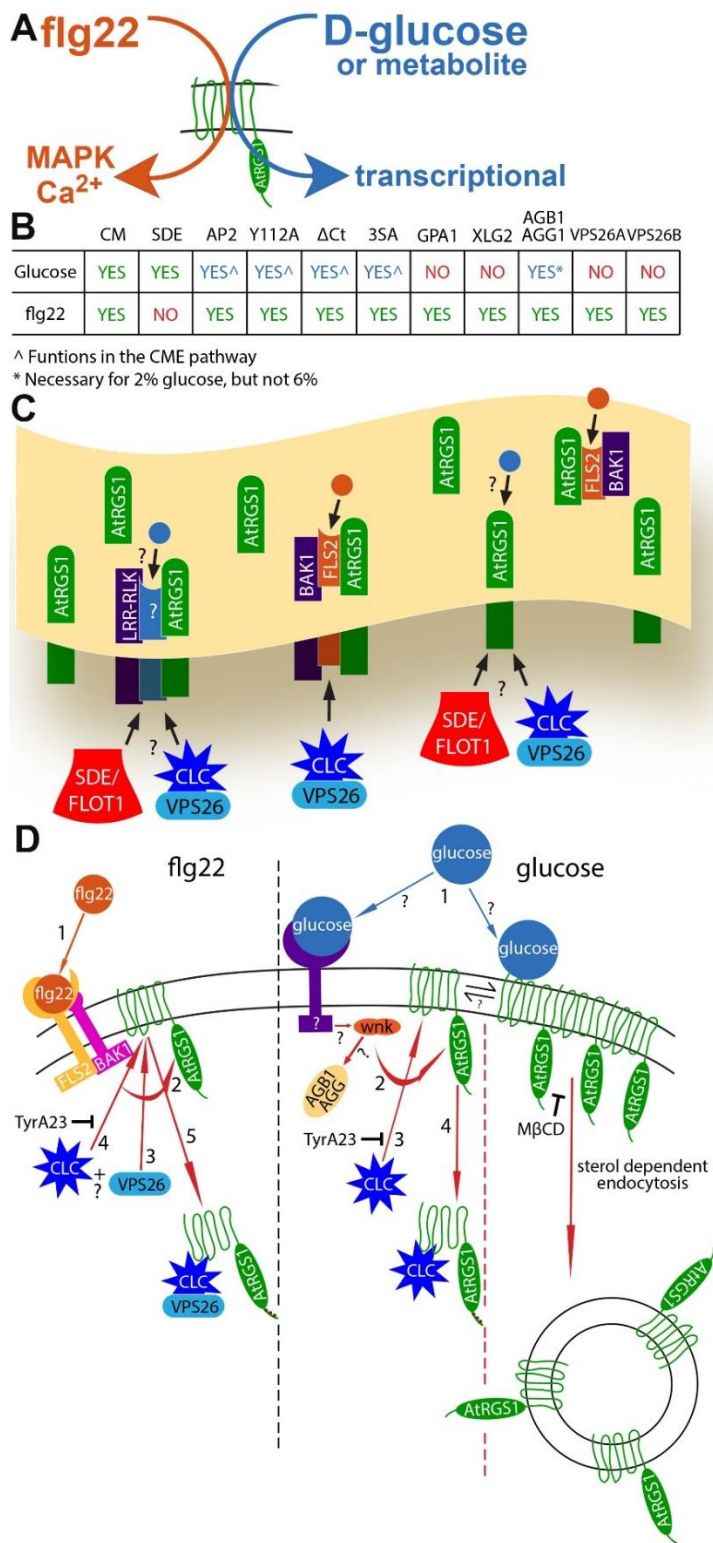

1613  
1614

1615 Figure S1  
1616

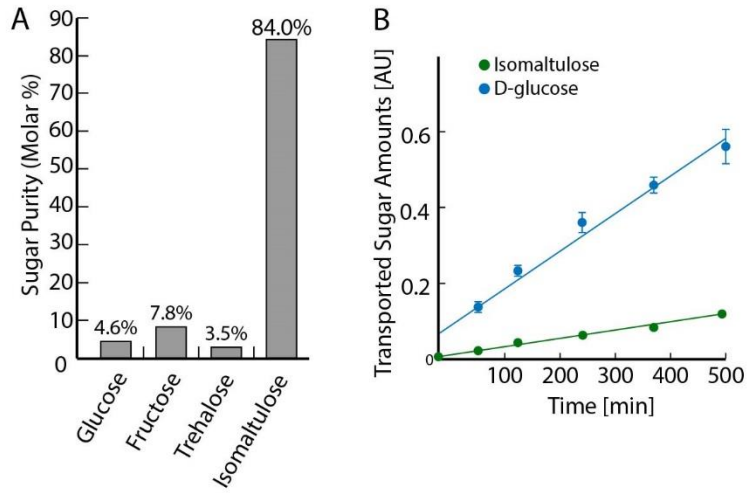

1617  
1618  
1619  
1620  
1621  
1622  
1623  
1624  
1625  
1626  
1627  
1628  
1629  
1630  
1631  
1632  
1633  
1634  
1635  
1636  
1637  
1638  
1639  
1640  
1641  
1642  
1643  
1644  
1645  
1646  
1647  
1648

1649 Figure S2

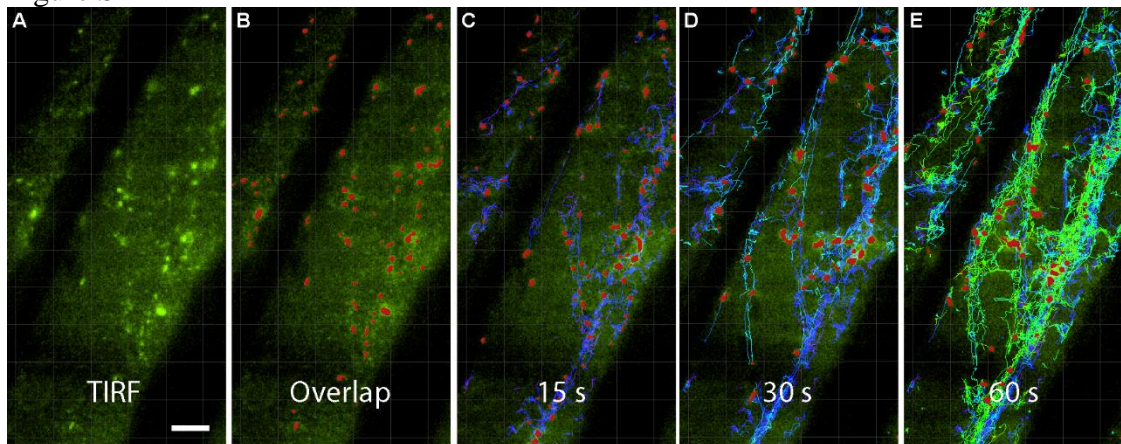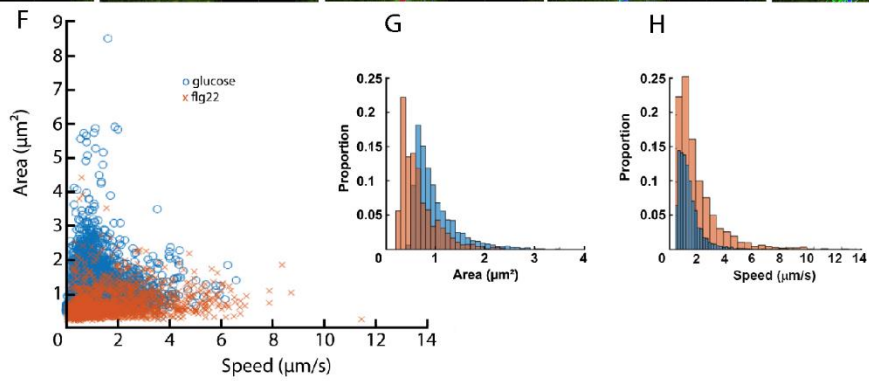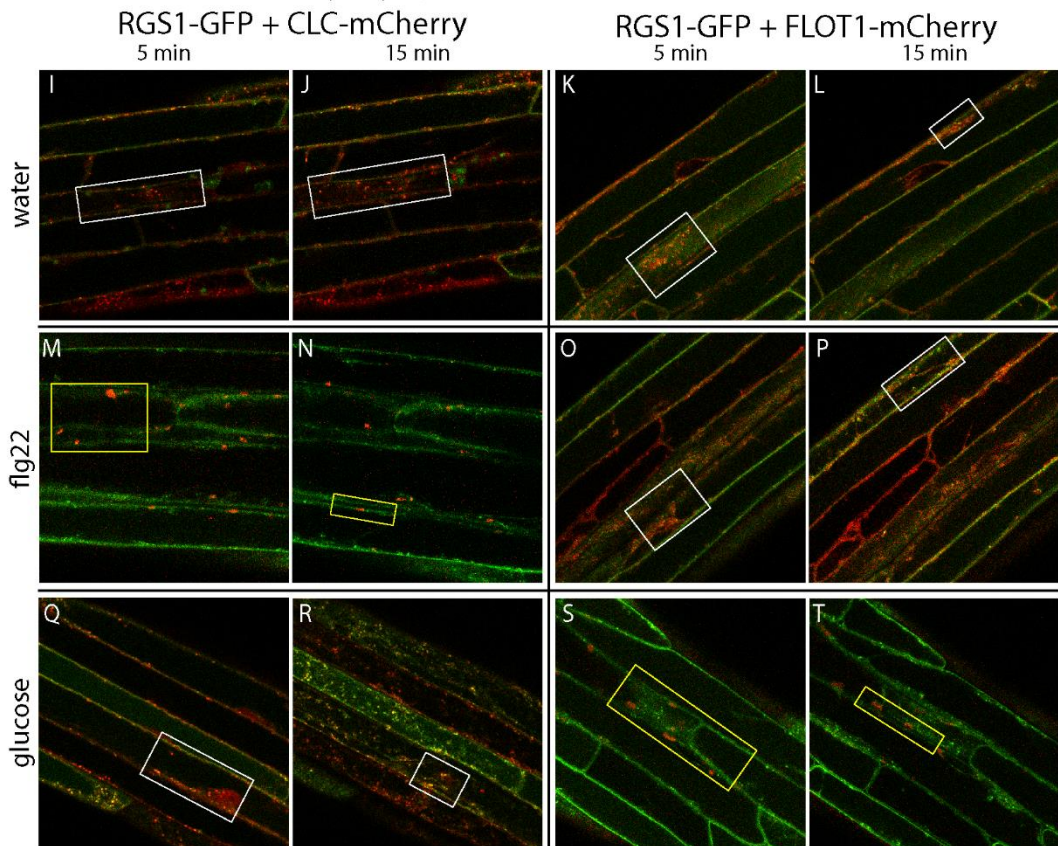

1650

1651 Figure S3  
1652

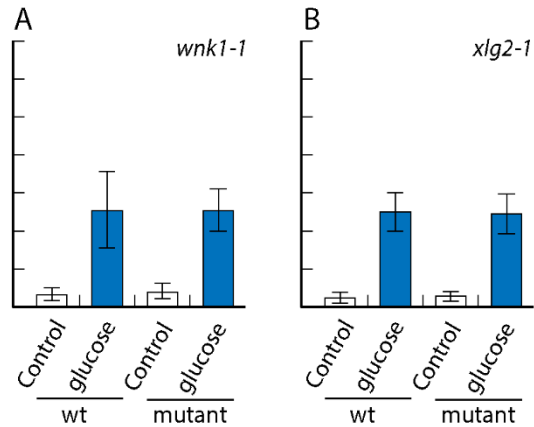

1653  
1654  
1655  
1656  
1657  
1658  
1659  
1660  
1661  
1662  
1663  
1664  
1665  
1666  
1667  
1668  
1669  
1670  
1671  
1672  
1673  
1674  
1675  
1676  
1677  
1678  
1679  
1680  
1681  
1682  
1683  
1684  
1685  
1686

1687 Figure S4  
1688

**A**

```
      1      10      20      30      40      50      60      70
DpArr1  . . . MGSWSHPQFEKGMV . . . TKKAKVYKKA SPNGKLTLYLAKRDYYDHKEWQDNIDGVCVVDPDYLNKRKVFGLTVAVFRYG
p44     . . . . . MKANKP . . . . . APNHVIFKKISRDKSVTIYLKGRDYIDHVERVEPVDGVVLDPELVKGRVVVSLTCAFRYG
BtArr3 . . . . . . . M . . . . . ANMSRVFKKTSN GKLSIYLGRDFVDHVMVEPIDGVVLDPEYLKGRKMFVMLTCAFRYG
PmArr1 . . . . . MEDNSK . . . . . RQGT RVFKKSPN GKITVYLGKRD FVDHITHVDPIDGVVLDPEYLKGRKVFVGLTCAFRYG
BtArr1 . . . . . . . . . . . DGKTRVFKKASPN GKLTVYLGKRD FVDHIDLVEPVDGVVLDPEYLKERVVVTLTCAFRYG
HsArr1 . . . . . . . MG . . . . . DKGTRVFKKASPN GKLTVYLGKRD FVDHIDLVEPVDGVVLDPEYLKERVVVTLTCAFRYG
BtArr2 . . . . . . . MGE . . . . . KPGRVFKKSPN CKLTVYLGKRD FVDHLDKVDVDGVVLDVDYLKDRKVFVTLTCAFRYG
HsArr2 . . . . . . . MGE . . . . . KPGRVFKKSPN CKLTVYLGKRD FVDHLDKVDVDGVVLDVDYLKDRKVFVTLTCAFRYG
AtVPS26like . . . . . . . . . . . MATATTVNVKLS . . . . . RSNRIYRSS EPVEGKIVIK . . . . . SATSISHQAIRLSVNG
AtVPS26A MNYLLGAFKPACNISITFTDGKNNRKQVPTKKNR GQ . I . . . . . VMNPLFQSQETIAGKINIEP . YQGK KVEHNGVKVEL . LG
AtVPS26B MNYLLGAFKPACNISITFTSDGKNNRKQVPMKKENGQ . T . . . . . ALVPLFHSQDTISGKVCIEP . YQGK KVEHNGVKVEL . LG
HsVPS26A MSFLGGFFGPIICEIDVLNDGETR KMAEMKTEDGK . V . . . . . EKHYLFYDGESVSGKVNLFKQPGKRLHEHQIRIEF . VG
BtVPS26A MSFLGGFFGPIICEIDVVLNDGETR KMAEMKTEDGK . V . . . . . EKHYLFYDGESVSGKVNLFKQPGKRLHEHQIRIEF . VG
HsVPS26B MSFFG . . FGQSVEVEILLNDAESRKRAEHKTEDGK . K . . . . . EKHYLFYDGETVSGKVSLALKNPNKRLEHQGIRIEF . VG
BtVPS26B MSFFG . . FGQSVDVDILLNDADSRRAEHKTEDGK . K . . . . . DKYFLFYDGETVSGKVSLALKNPNKRLEHQGITKVEF . IG

      80      90      100      110      120      130      140      150
DpArr1  REDMDVMGVSFR . . . KDF . . . VKQMQUIYPPEEN . QRPLTK LQAKLLNKLGENAVP . . . HYDLPTNTPD . TWCIQPSEYDGGAPCG
p44     QEDLDVMGLSFR . . . RDLY . . . FSQVQVFPVGA . . SGATRL QOESLIKKLGANTYP . . . LLTFDPYLPCSVMLQPAPQDVGKSCG
BtArr3  HDLDLIGLTFR . . . KDLY . . . VQVQVVAEASSPRGSLTV LQERLLHKLGDNAYP . . . TLQMVNLPCSVTLQPGPDDTKACG
PmArr1  REDLDVGLTFR . . . KDLY . . . LASEQIFFLDPNN . KRPLTR LQERLIKKLGPNAFP . . . FFELPPHCPASVTLQAPGDMKPCG
BtArr1  REDLDVGLTFR . . . KDLF . . . VANVQSFPPAPE . KKPLTR LQERLIKKLGEHAYP . . . TFEIIPNLPCSVTLQPGPEDTGKACG
HsArr1  REDLDVGLTFR . . . KDLF . . . VANVQSFPPAPE . KKPLTR LQERLIKKLGEHAYP . . . TFEIIPNLPCSVTLQPGPEDTGKACG
BtArr2  REDLDVGLSFR . . . KDLF . . . IANYQAFPTPNP . PRPPTL LQERLLRKLQGHAPH . . . FFTIPQNLPCSVTLQPGPEDTGKACG
HsArr2  REDLDVGLSFR . . . KDLF . . . IATYQAFPPVNP . PRPPTL LQDRLLRKLQGHAPH . . . FFTIPQNLPCSVTLQPGPEDTGKACG
AtVPS26like . . . . . SVNLQVRGGSAGVIESFYGV . IKPIQIVKKTIE . . . . . VKSSGKIPPGTIEIP . . . . . SLNLRPEGEGIV . EKFYETFHGTNIN
AtVPS26A QIEMFYDRGNFY . . . DFTSLVR . . . . . . . . . . . IDVPGEIYER . KTYPE . . . . . EFSTV . EMPYETYNQVNR
AtVPS26B QIEMFYDRGNFY . . . DFTSLVR . . . . . . . . . . . LDPVGEIYER . KTYPE . . . . . EFFT . EMPYETYNQVNR
HsVPS26A QIELFNDKSNTH . . . EFVNLVK . . . . . . . . . . . LALPGELTQS . RSYDF . . . . . EFMQV . EKPYESYI . GANVR
BtVPS26A QIELFNDKSNTH . . . EFVNLVK . . . . . . . . . . . LALPGELTQS . RSYDF . . . . . EFMQV . EKPYESYI . GANVR
HsVPS26B QIELYYDRGNHH . . . EFVSLVK . . . . . . . . . . . LARPGEITQS . QAFDF . . . . . EFTHW . EKPYESYT . GQNVK
BtVPS26B QIELYYDRGNHH . . . EFVSLVK . . . . . . . . . . . LARPGEVTQS . QAFDF . . . . . EFTHW . EKPYESYT . GQNVK

      160      170      180      190      200      210
DpArr1  VD YQVTTIYVSN . . . MDKTIH . . . . . KRNSVLSIR . . . . . KLSYF EFGSDEQPRGEISKE . . . . . FK . . . . . FSGAMKTEC
p44     VDFEIKAFATHSTVD EEDKIP . . . . . KKSVRLLIR . . . . . KVOHAFRDMGPPRAEASWQ . . . . . EF . . . . . MSDKPLRAV
BtArr3  VDVEVKSFAEN . . . LEKVS . . . . . KRDSVRLVIR . . . . . KIQFAPLEPGPGPWARLCRR . . . . . FL . . . . . LSAQPLLTQA
PmArr1  VDVELKAVVGD . . . VDDKPH . . . . . KRNSVRLAIR . . . . . KVMYAPIKQGEQPSVEVSK . . . . . EM . . . . . MSPNKLHEA
BtArr1  VDVEVKAFAEN . . . LEKIH . . . . . KRNSVRLVIR . . . . . KVQYAPERPGPQPTAETTRQ . . . . . FL . . . . . MSDKPLHEA
HsArr1  VDVEVKAFAEN . . . LEKIH . . . . . KRNSVRLVIR . . . . . KVQYAPERPGPQPTAETTRQ . . . . . FL . . . . . MSDKPLHEA
BtArr2  VDVEIRAFAKAS . . . LEKSH . . . . . KRNSVRLVIR . . . . . KVQFAPKPGPQPSAETTRH . . . . . FL . . . . . MSDRSLHEA
HsArr2  VDVEIRAFAKAS . . . LEKSH . . . . . KRNSVRLVIR . . . . . KVQFAPKPGPQPSAETTRH . . . . . FL . . . . . MSDRSLHEA
AtVPS26like IQVLLTADIPRG . . . YLHKLPSATMEFIE . SGV . . . . . LPERPPIPEIVIFYITQDTQRHLPLD . . . . . IKTGGFRVTGKLIATQCSTQD
AtVPS26A LRVVLKVTIVRR . . . YAGSI VEY . QDFVV . RNYVLP . . . . . LPPIN . NSIKME . V . . . . . GIEDCLHIEE . . . . . YNKSKEYHKD
AtVPS26B LRVVLKVTIVRR . . . YAGSI L EY . QELVV . RNYVLP . . . . . LPDIN . NSIKME . V . . . . . GIEDCLHIEE . . . . . YNKSKEYHKD
HsVPS26A LRVFLKVTIVRR . . . LTDLVKEY . . . . . DLIV . HQLATYPDVN . NSIKME . V . . . . . GIEDCLHIEE . . . . . YNKSKEYHKD
BtVPS26A LRVFLKVTIVRR . . . LTDLVKEY . . . . . DLIV . HQLATYPDVN . NSIKME . V . . . . . GIEDCLHIEE . . . . . YNKSKEYHKD
HsVPS26B LRVFLRATISRR . . . LNDVVKEM . . . . . DIVV . HTLS . . . . . TYPENL . NSIKME . V . . . . . GIEDCLHIEE . . . . . YNKSKEYHKD
BtVPS26B LRVFLRATISRR . . . LNDVVKEM . . . . . DIVV . HTLS . . . . . TYPENL . NSIKME . V . . . . . GIEDCLHIEE . . . . . YNKSKEYHKD

      220      230      240      250      260      270      280      290
DpArr1  TLDKARYYSGESMNT . . . SVCVDNPTSKKAKRIKIQT . . . IQLADICLYETVTVYKSVVTELETEEGFP . . . EPNTSGFCQVYKLRPVLEV
p44     SLSKEIYYHGEP . . . IPTVAVTNSTEKT . . . VKKIKV . . . . . LVEQVNTNVVLYSSDYIKTVAAEEAQE . . . . . KVPPN . SSLTKTLTLVPLLAN
BtArr3  WMDKREVNYHGQP . . . ISVNVSINNSTNKVKKIKISV . . . DQITDVVLYSLDKYTRTFVVFQEFTE . . . . . TIAAN . STFSKSAVTPPLAD
PmArr1  SLDKELYYHGETVA . . . NVNHVHIQNNNSKSVKKIKISV . . . IQRFADICLFSTAQYKCTVAETESEEKPGV . . . GPG . FSISKVFTLTPPLSN
BtArr1  SLDKELYYHGETVA . . . NVNHVTNNNTKT . . . VKKIKISV . . . RQYADICLFNTAQYKCPVAMEEADD . . . . . TVAPS . STFCVYTLTPFLAN
HsArr1  SLDKELYYHGETVA . . . NVNHVTNNNTKT . . . VKKIKISV . . . RQYADICLFNTAQYKCPVAMEEADD . . . . . TVAPS . STFCVYTLTPFLAN
BtArr2  SLDKELYYHGETVA . . . NVNHVTNNNTKT . . . VKKIKISV . . . RQYADICLFSTAQYKCPVAQVEQDD . . . . . QVSPS . STFCVYTITPPLSN
HsArr2  SLDKELYYHGETVA . . . NVNHVTNNNTKT . . . VKKIKISV . . . RQYADICLFSTAQYKCPVAQVEQDD . . . . . QVSPS . STFCVYTITPPLSN
AtVPS26like PLSGELTVEASSVP . . . . . TSIDLHLLRVE . . . . . . . . . . . . . . . . . . . . . . . . . . . . . . . . . . . . . .
AtVPS26A VILGKIYFLLVRIKI . . . . . . . . . . . . . . . . . . . . . . . . . . . . . . . . . . . . . . . . . . . . . . . .
AtVPS26B VILGKIYFLLVRIKI . . . . . . . . . . . . . . . . . . . . . . . . . . . . . . . . . . . . . . . . . . . . . . . .
HsVPS26A VIVGKIYFLLVRIKI . . . . . . . . . . . . . . . . . . . . . . . . . . . . . . . . . . . . . . . . . . . . . . . .
BtVPS26A VIVGKIYFLLVRIKI . . . . . . . . . . . . . . . . . . . . . . . . . . . . . . . . . . . . . . . . . . . . . . . .
HsVPS26B VIVGKIYFLLVRIKI . . . . . . . . . . . . . . . . . . . . . . . . . . . . . . . . . . . . . . . . . . . . . . . .
BtVPS26B VIVGKIYFLLVRIKI . . . . . . . . . . . . . . . . . . . . . . . . . . . . . . . . . . . . . . . . . . . . . . . .
```

1689  
1690  
1691  
1692

1693

```

290      300      310      320      330      340
DpArr1  KLRPVLEVTKRRAGLALNCKVKYE D T M L A A S T E D A G N V D K E N L G V V . . . . . V S Y K V R I K M T L G F G
p44     TLVP LLANNRERRGIALD G K I K H E D T N L A S S T I I K E G I D K T V M G I L . . . . . V S Y Q I K V K L T V . . S
BtArr3  AVTP LLADNCHKQGLALD G K L K Q G D T N L A S S T I I R P G V D K E L L G I L . . . . . V S Y K V R V N L M V S C E
PmArr1  TLTP LLSSNRDKWGLALD G K L K D E D T N L A S S T V I T D S S Q K E N L G I I . . . . . V Q Y K V K V K L N L . . G
BtArr1  TLTP FLANNREKRGLALD G K L K H E D T N L A S S T L L R E G A N R E I L G I I . . . . . V S Y K V K V K L V V S R G
HsArr1  TLTP FLANNREKRGLALD G K L K H E D T N L A S S T L L R E G A N R E I L G I I . . . . . V S Y K V K V K L V V S R G
BtArr2  TITP LLSSNRKRGLALD G K L K H E D T N L A S S T I V K E G A N K E V L G I L . . . . . V S Y R V K V K L V V S R G
HsArr2  TITP LLSDNREKRGLALD G K L K H E D T N L A S S T I V K E G A N K E V L G I L . . . . . V S Y R V K V K L V V S R G
AtVPS26like . . . . . S I I V G E R I V T E T S L I Q S T Q I A D G D V C R N M T L P I Y V L L P R L L M C P S V F . . A G P F S V E F K V C I T I S F K
AtVPS26A . . . . . S T G A G A N T H V E T E T L A K F E L M D G A P V R G E S I P V R V F L T P Y D L T P T H K N I N N K F S V K Y Y L N L V L V D E
AtVPS26B . . . . . S T G A G A N T H V E T E T L A K F E L M D G A P V R G E S I P V R L F L A P Y D L T P T H R N I N N K F S V K Y Y L N L V L V D E
HsVPS26A . . . . . I T G I G P S T T T E T E T I A K Y E I M D G A P V K G E S I P I R L F L A G Y D P T P T M R D V N K K F S V R Y F L N L V L V D E
BtVPS26A . . . . . I T G I G P S T T T E T E T I A K Y E I M D G A P V K G E S I P I R L F L A G Y D P T P T M R D V N K K F S V R Y F L N L V L V D E
HsVPS26B . . . . . T T G T G P N V Y H E N D T I A K Y E I M D G A P V R G E S I P I R L F L A G Y E L T P T M R D I N K K F S V R Y Y L N L V L I D E
BtVPS26B . . . . . T T G T G P N V Y H E N D T I A K Y E I M D G A P V R G E S I P I R L F L A G Y E L T P T M R D I N K K F S V R Y Y L N L V L I D D

```

```

350      360      370      380
DpArr1  . . . . . S G D M L L E V F F K L C P A R L K G R L A Q P E A R E . G D D A E . . . . .
p44     G L I G E L T S S E V A T E V F F R L M H F Q P E D P D T A K E S A . . . . .
BtArr3  G I L G D L T A S E V G V E L P L I L M H F K P S N E A A S . . . . . S E D I V I
PmArr1  P L V G . . . . D L V A E L P F T L M H F K P E E E P E V N N . . . . K P A V P P A S S P T Q D P N S A P A V D T N L I E L D T D G T C Y A D Q D D D I I F
BtArr1  G L L G D L A S S D V A V E L P F T L M H F K P K E E P P . . . . . H R E V P E H E T P V D T N L I E L D T N . . . . . D D D I V F
HsArr1  G L L G D L A S S D V A V E L P F T L M H F K P K E E P P . . . . . H R E V P E N E T P V D T N L I E L D T N . . . . . D D D I V F
BtArr2  G . . . . . D V S V E L P F V L M H F K P H D H I A L P R P Q S . A P T H P P T L L P S A V P E T D A P V D T N L I E F E T N Y . . . . A T D D D I V F
HsArr2  G . . . . . D V S V E L P F V L M H F K P H D H I L P R P Q S . A . . . . . A P E T D V P V D T N L I E F D T N Y . . . . A T D D D I V F
AtVPS26like SK L A . . . . . K A Q P K S D P T A P R L W M A L E R L P L E L V . . . . . R T K R D Q F S
AtVPS26A . . . . . R R Y F K Q Q E I T L Y R L K E E T S . . . . .
AtVPS26B . . . . . E D . . . . . R R Y F K Q Q E I T L Y R L K E D A S S . . . . .
HsVPS26A . . . . . E D . . . . . R R Y F K Q Q E I I L W R K A P E K L R . . . . . K Q R T N F H
BtVPS26A . . . . . E D . . . . . R R Y F K Q Q E I I L W R K A P E K L R . . . . . K Q R T N F H
HsVPS26B . . . . . E E . . . . . R R Y F K Q Q E V V L W R K G D I V R K S M . . . . . S H Q A I A S
BtVPS26B . . . . . E E . . . . . R R Y F K Q Q E V V L W R K G D I V R K S M . . . . . S H Q A I A S

```

```

DpArr1  . . . . .
p44     . . . . .
BtArr3  E E F A Q Q E P S G E S Q . . E A L A A E G N E G S . . . . .
PmArr1  E D F A R L R L K G E T E . . A . . . . .
BtArr1  E D F A R Q R L K G M K D . . D K E E E D G T G S P R L N D R
HsArr1  E D F A R Q R L K G M K D . . D K E E E D G T G S P Q L N N R
BtArr2  E D F A R L R L K G L K D . . E D Y D D Q F C . . . . .
HsArr2  E D F A R L R L K G M K D . . D D Y D D Q L C . . . . .
AtVPS26like C . . . . .
AtVPS26A . . . . .
AtVPS26B . . . . .
HsVPS26A . . . . . Q R F E S P E S Q A S A E Q P E M . . . . .
BtVPS26A . . . . . Q R F E S P E S Q A S A E Q P E M . . . . .
HsVPS26B . . . . . Q R F E G T T S L G E V R T P S Q L S D N N C R Q . . . . .
BtVPS26B . . . . . Q R F E G T T P L G E A R T P G P L S D S G N R Q . . . . .

```

1694

1695 **B.**

1696

|                |        |        |        |        |        |        |        |        |        |        |        |        |        |        |        |
|----------------|--------|--------|--------|--------|--------|--------|--------|--------|--------|--------|--------|--------|--------|--------|--------|
| 1: DpArr1      | 100.00 | 37.22  | 38.42  | 46.98  | 46.61  | 46.89  | 43.13  | 42.03  | 19.03  | 18.22  | 19.77  | 15.44  | 15.44  | 16.73  | 16.73  |
| 2: p44         |        | 100.00 | 52.79  | 49.72  | 59.50  | 59.22  | 56.46  | 56.01  | 18.56  | 15.16  | 15.16  | 12.65  | 12.65  | 12.24  | 12.65  |
| 3: BtArr3      |        |        | 100.00 | 50.00  | 60.77  | 60.51  | 56.58  | 54.79  | 17.10  | 16.03  | 16.03  | 13.51  | 13.51  | 14.61  | 16.10  |
| 4: PmArr1      |        |        |        | 100.00 | 66.33  | 66.58  | 63.48  | 63.09  | 17.86  | 17.41  | 18.55  | 12.96  | 12.96  | 14.65  | 15.02  |
| 5: BtArr1      |        |        |        |        | 100.00 | 99.04  | 77.81  | 78.33  | 17.54  | 19.83  | 19.83  | 14.67  | 14.67  | 15.36  | 16.10  |
| 6: HsArr1      |        |        |        |        |        | 100.00 | 78.05  | 78.59  | 17.16  | 19.41  | 20.25  | 14.29  | 14.29  | 14.98  | 15.73  |
| 7: BtArr2      |        |        |        |        |        |        | 100.00 | 96.95  | 17.02  | 14.11  | 14.86  | 12.50  | 12.50  | 13.88  | 14.23  |
| 8: HsArr2      |        |        |        |        |        |        |        | 100.00 | 16.79  | 13.91  | 14.35  | 11.51  | 11.51  | 13.90  | 14.29  |
| 9: AtVPS26like |        |        |        |        |        |        |        |        | 100.00 | 21.61  | 19.71  | 21.35  | 21.35  | 20.42  | 20.07  |
| 10: AtVPS26A   |        |        |        |        |        |        |        |        |        | 100.00 | 91.06  | 56.48  | 56.15  | 54.18  | 53.51  |
| 11: AtVPS26B   |        |        |        |        |        |        |        |        |        |        | 100.00 | 57.95  | 57.62  | 55.00  | 54.33  |
| 12: HsVPS26A   |        |        |        |        |        |        |        |        |        |        |        | 100.00 | 99.69  | 70.46  | 68.92  |
| 13: BtVPS26A   |        |        |        |        |        |        |        |        |        |        |        |        | 100.00 | 70.15  | 68.62  |
| 14: HsVPS26B   |        |        |        |        |        |        |        |        |        |        |        |        |        | 100.00 | 95.54  |
| 15: BtVPS26B   |        |        |        |        |        |        |        |        |        |        |        |        |        |        | 100.00 |

1697

1698

1699 C.  
1700

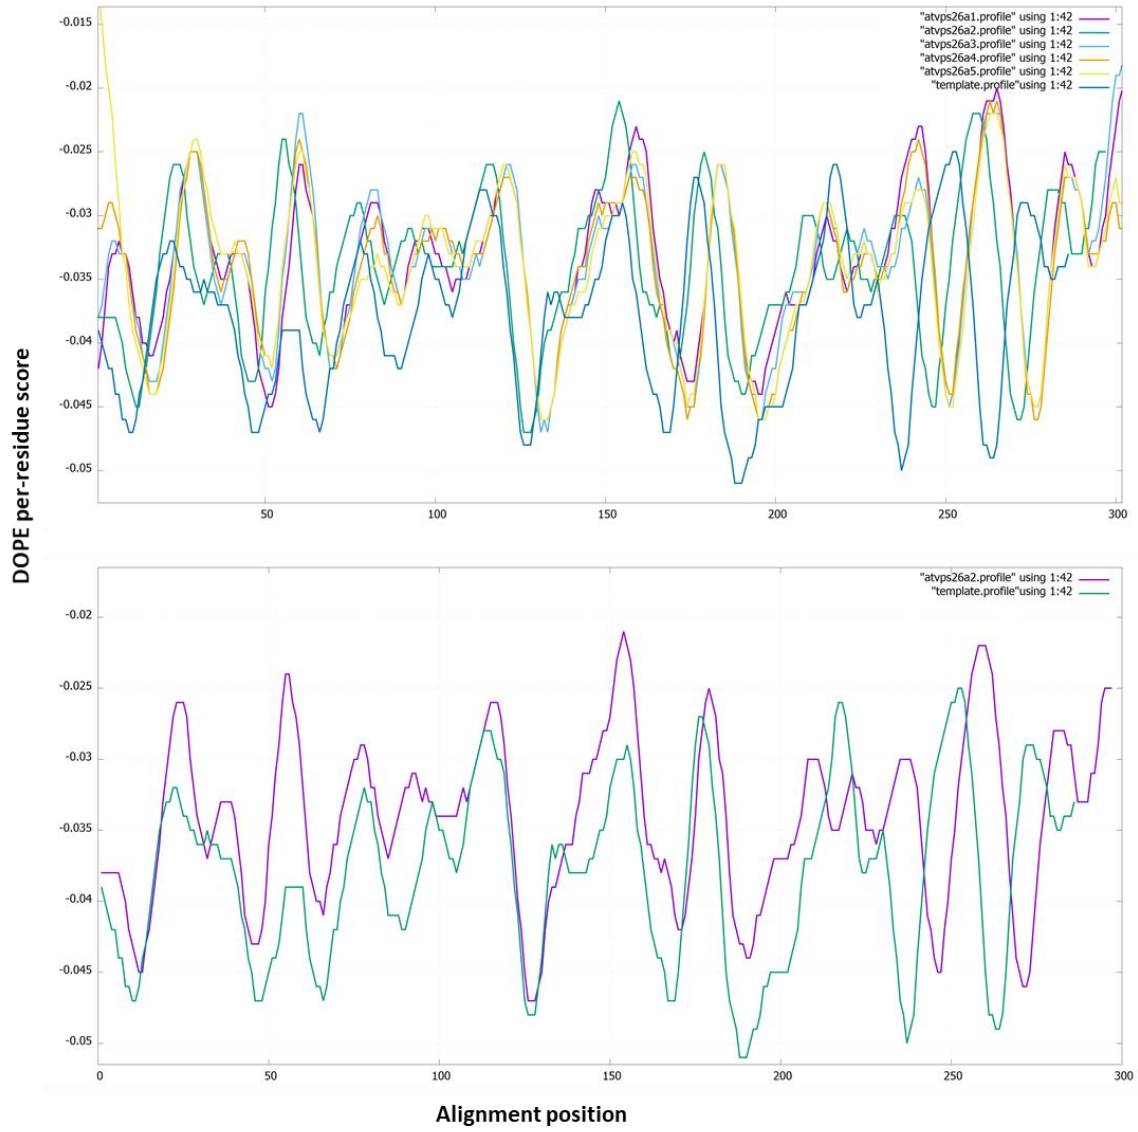

1701  
1702



1703 **D.**

| Filename      | molpdf     | DOPE score   | GA341 score | RMSD  |
|---------------|------------|--------------|-------------|-------|
| atvps26a1.pdb | 2292.41699 | -30278.39648 | 1.00000     | 0.309 |
| atvps26a2.pdb | 2233.81055 | -30840.71289 | 1.00000     | 0.17  |
| atvps26a3.pdb | 2258.48999 | -30400.76953 | 1.00000     | 0.277 |
| atvps26a4.pdb | 2212.42798 | -30568.29883 | 1.00000     | 0.244 |
| atvps26a5.pdb | 2188.86987 | -30466.78711 | 1.00000     | 0.217 |

1704

1705 **E.**

1706

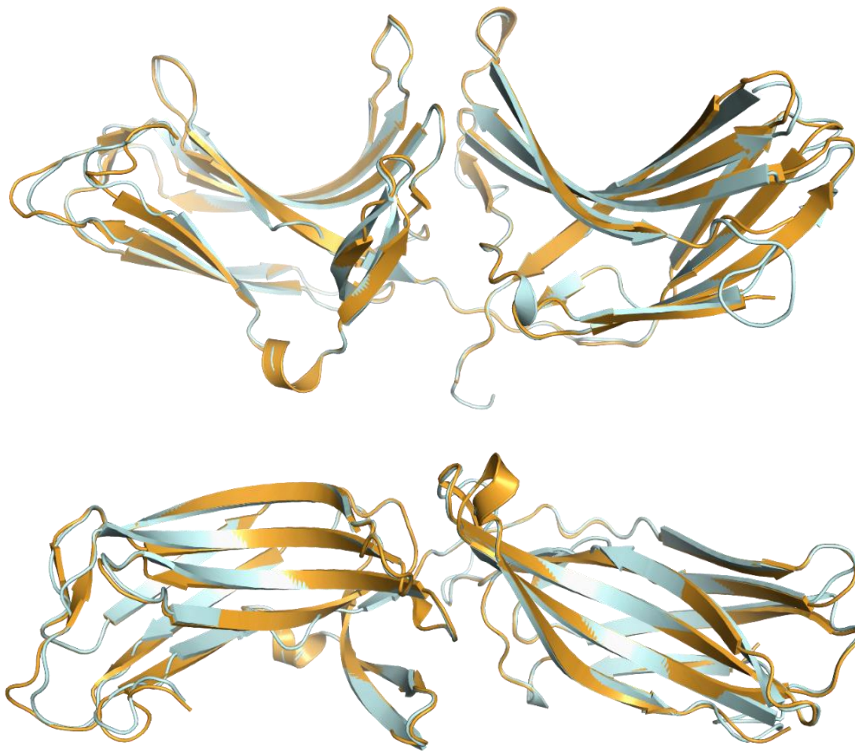

1707

1708

1709 **F.**

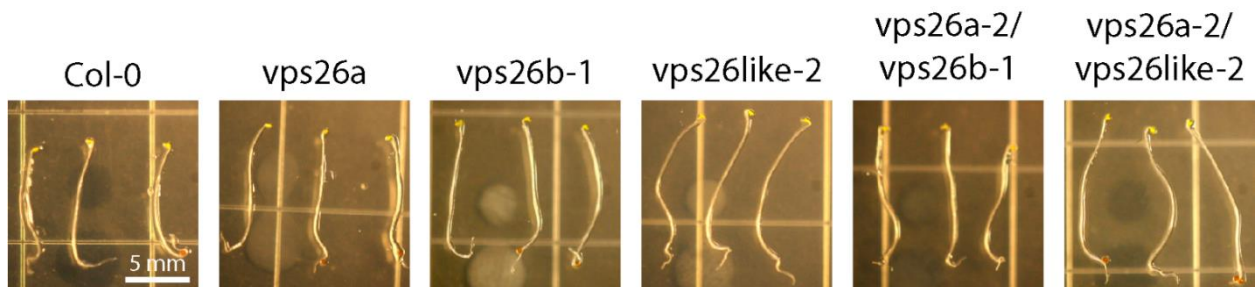

1710

1711  
1712 Figure S5  
1713

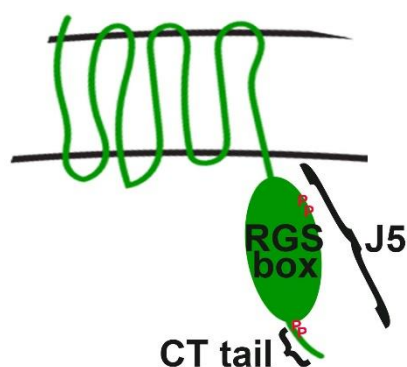

1714  
1715  
1716 Figure S6  
1717

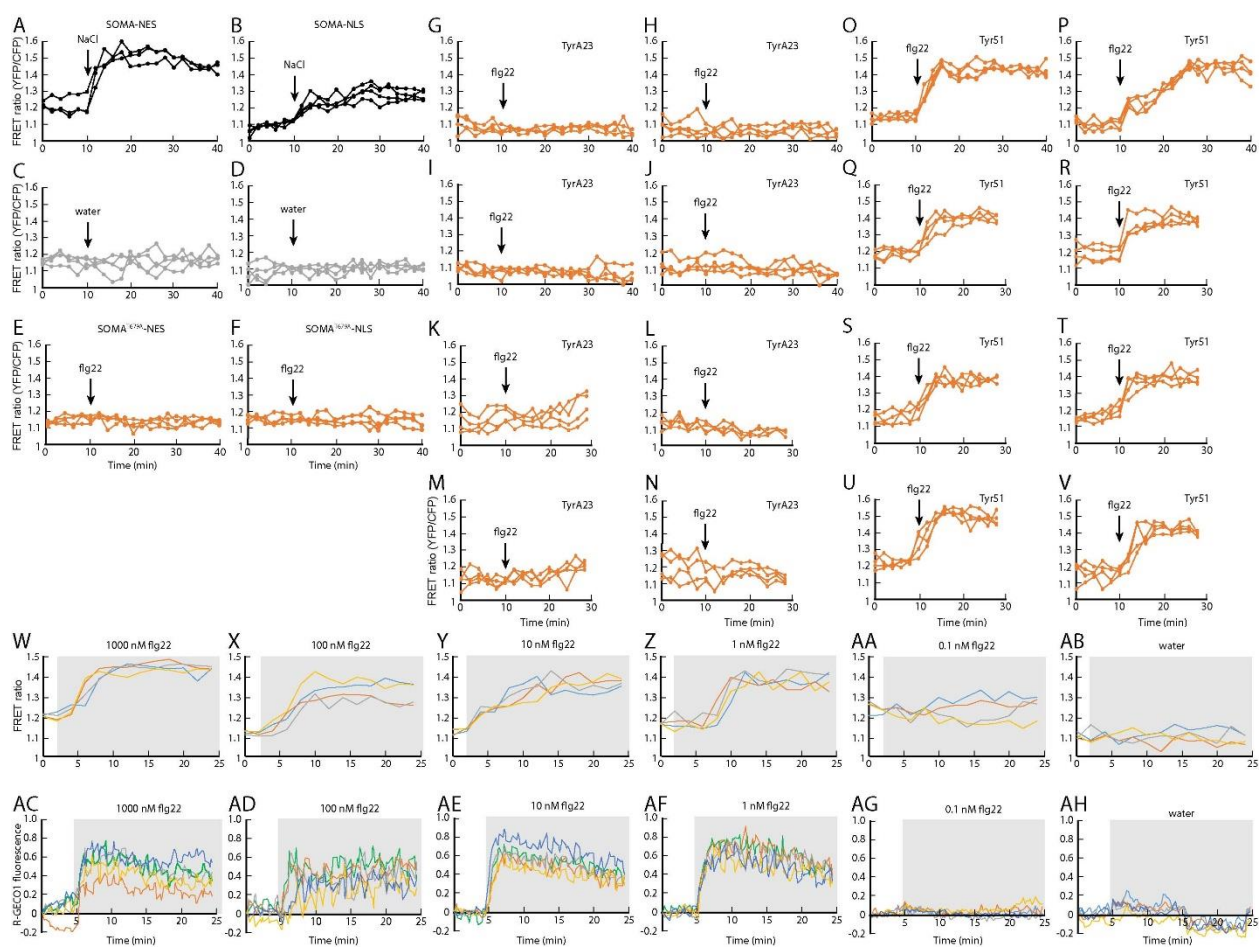

1718  
1719  
1720  
1721  
1722  
1723

1724 **Supplemental code.**

```
1725
1726 Data = xlsread('IMARIS statistics output')
1727 % first step: sort the data based on the track ID, and
1728 % subsort it on time points.
1729 sortedData=sortrows(Data,[3,4]);
1730 trackIDs=sortedData(:,3);
1731 %trackIDs is only the ith column from the original sorted data, separate
1732 %array
1733 uniquetrackIDs=unique(trackIDs);
1734 %uniquetrackIDs is a separate array with only unique track IDs
1735
1736 %StartEnd=zeros(length(uniquetrackIDs),2);
1737 meanSpeedArea=zeros(length(uniquetrackIDs),2);
1738
1739 % Make a matrix with all its elements zeros. One dimension of the matrix
1740 % is length of unique track IDs, i.e., the number of unique track IDs.
1741 % Another dimension is 2 because we want to store the start and end
1742 % locations of each of the unique track IDs.
1743 for i = 1:length(uniquetrackIDs)
1744     ItrackID=uniquetrackIDs(i);
1745     locations=find(trackIDs==ItrackID);
1746     startLoc=locations(1);
1747     endLoc=locations(end);
1748     SpeedColumn=sortedData(:,1);
1749     meanSpeedArea(i,1)=mean(SpeedColumn(startLoc:endLoc));
1750     AreaColumn=sortedData(:,2);
1751     meanSpeedArea(i,2)=mean(AreaColumn(startLoc:endLoc));
1752     %StartEnd(i,1)=startLoc;
1753     %StartEnd(i,2)=endLoc;
1754
1755 end
1756
```
